# Supplementary material for: Boolean regulatory network reconstruction using literature based knowledge with a genetic algorithm optimization method
Source: Springer Nature journal article supplement (doi:10.1186/s12859-016-1287-z), 2016-10-06

# Cell-fate decision model: training set 1 (Large)

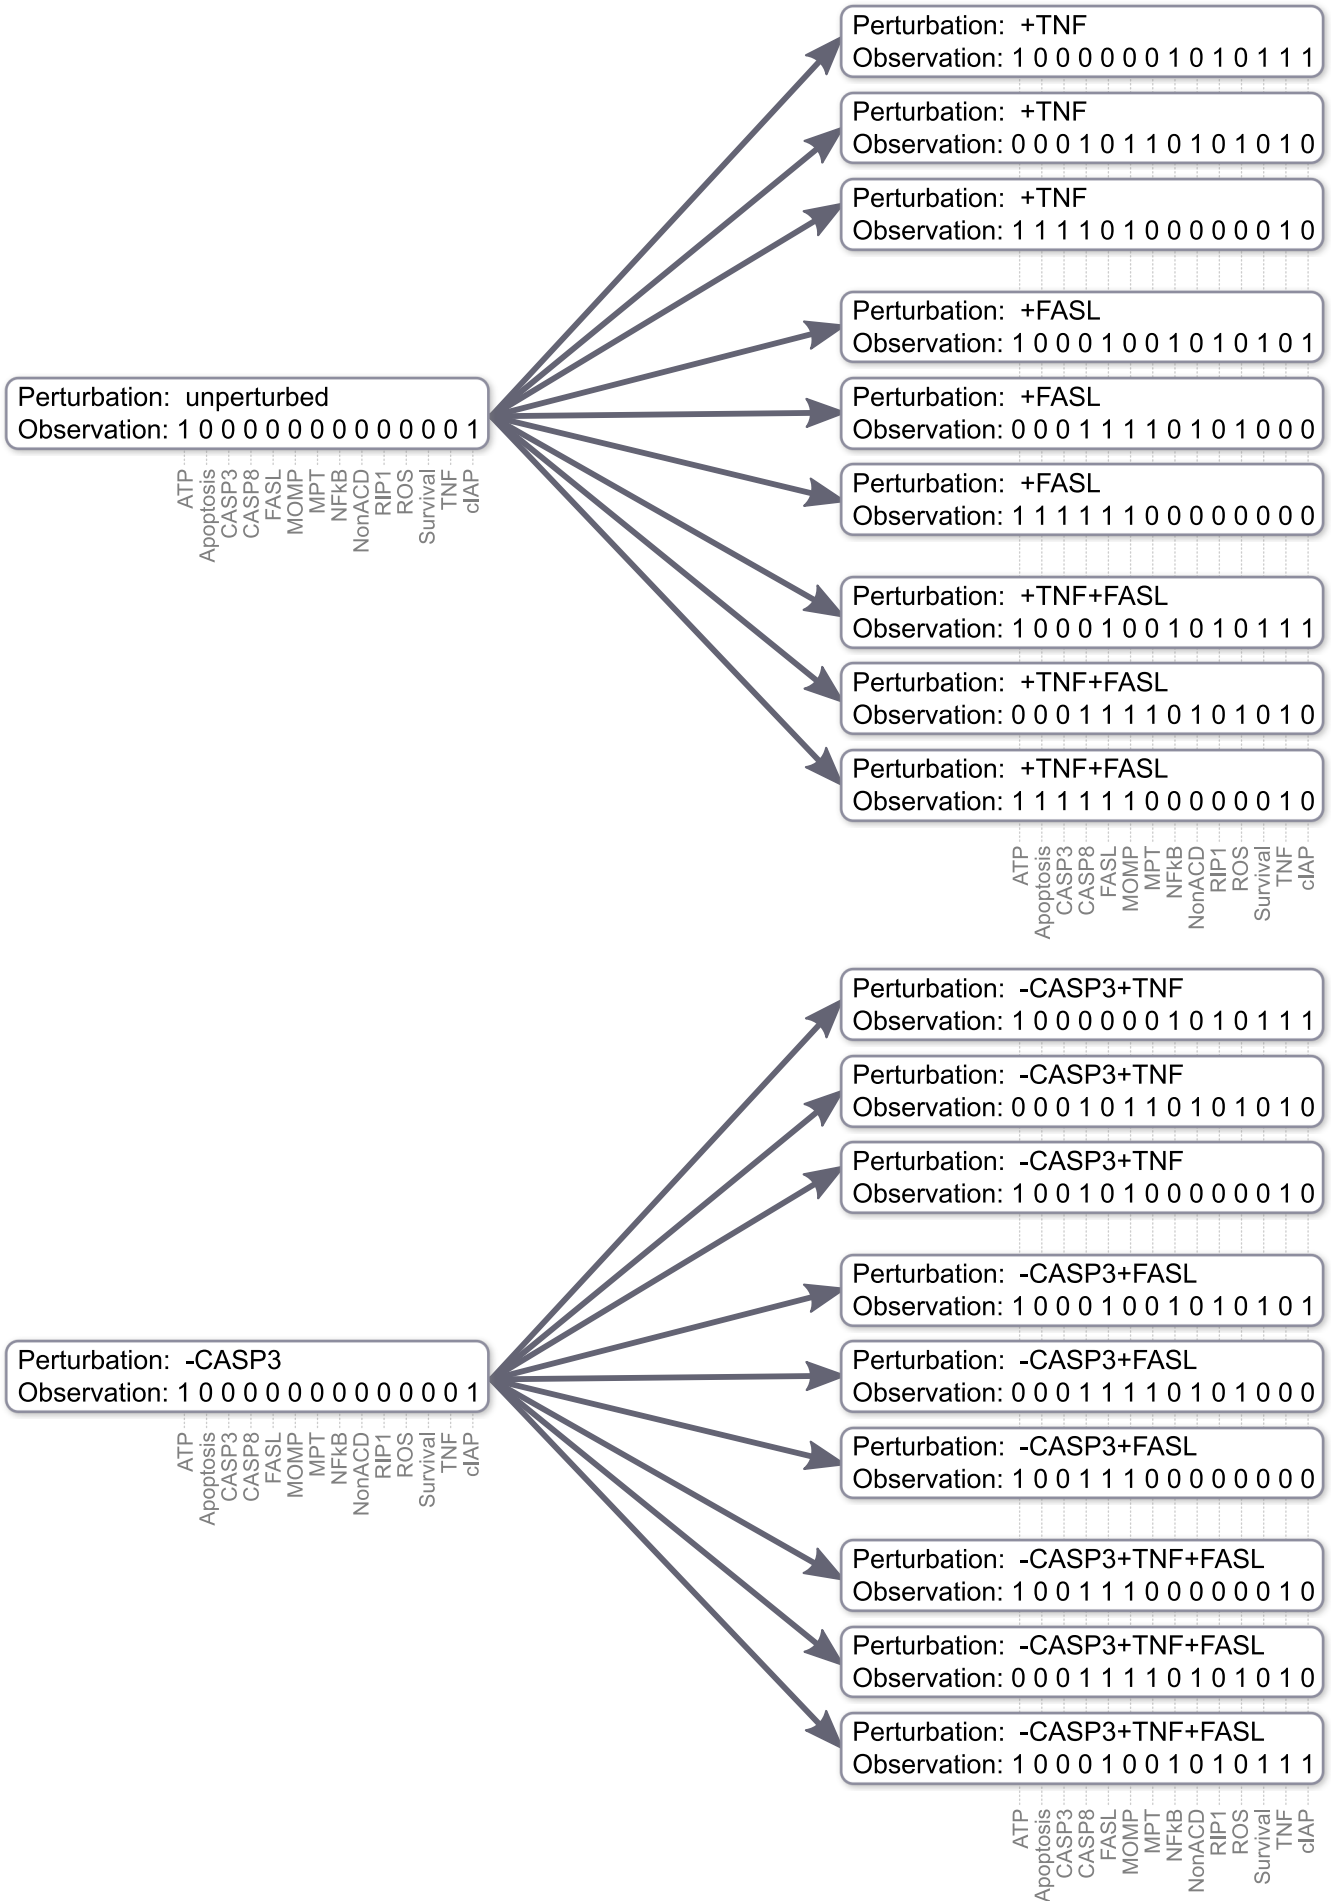

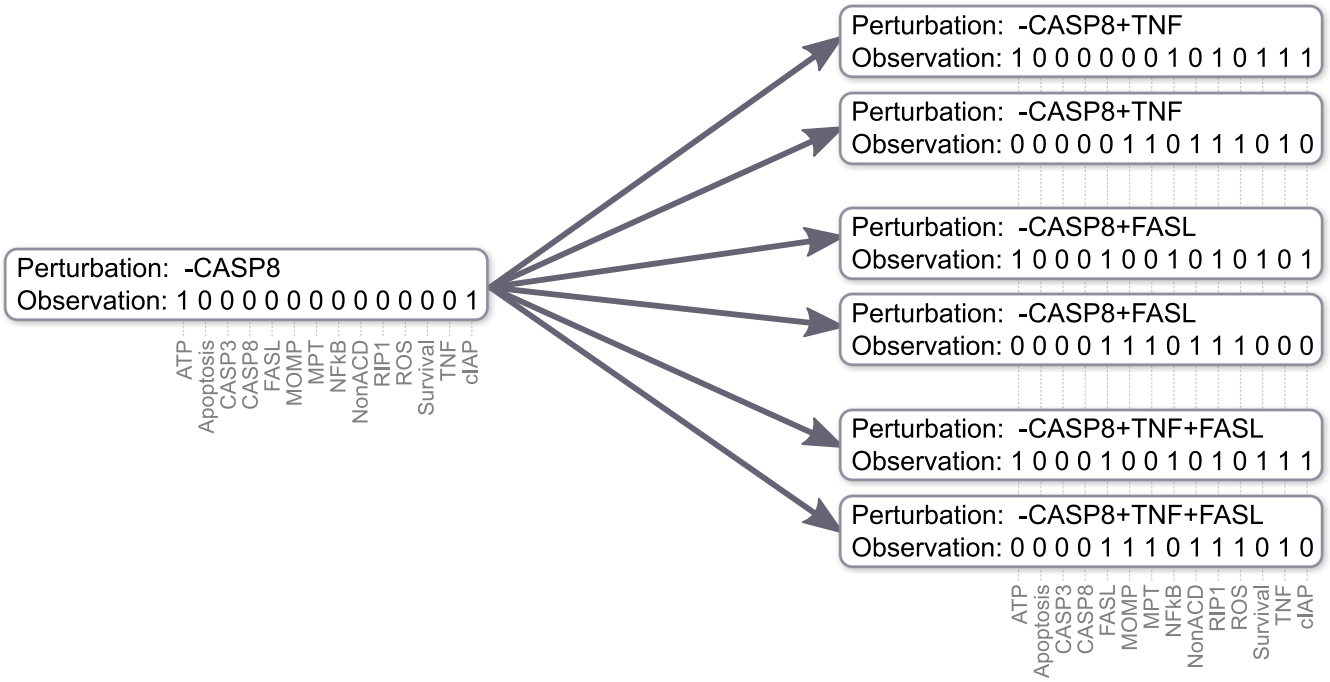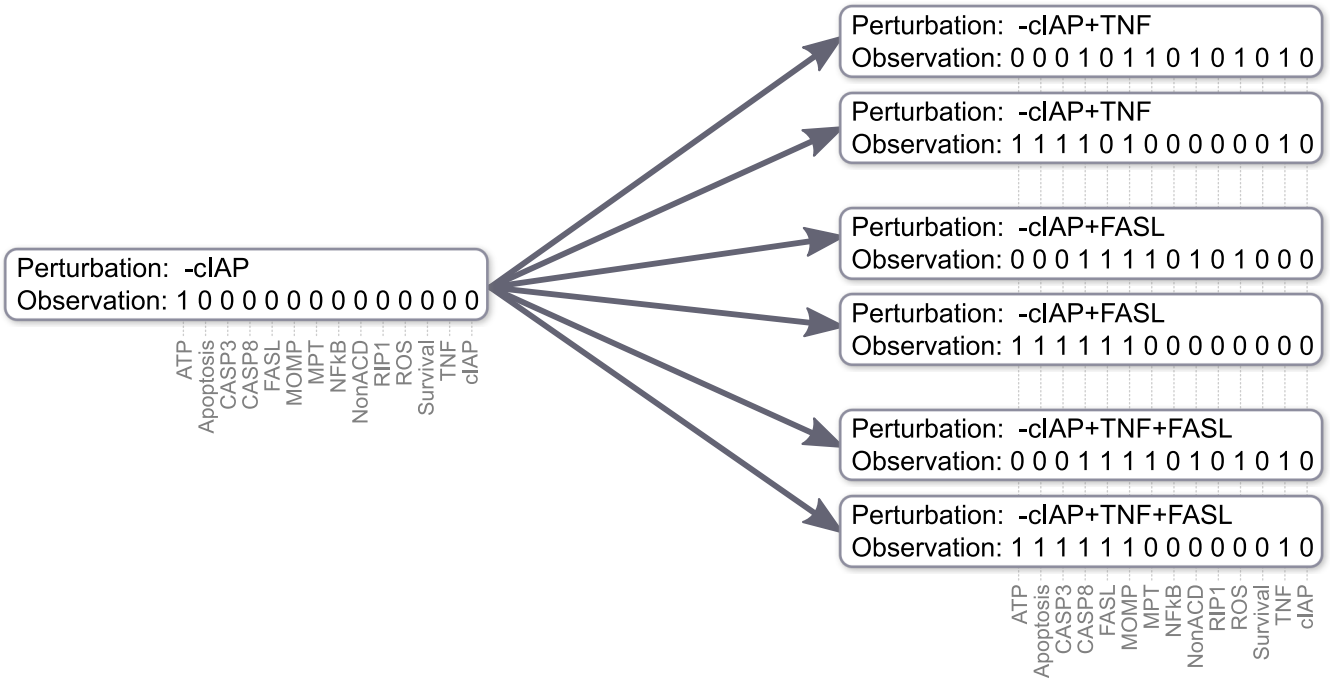

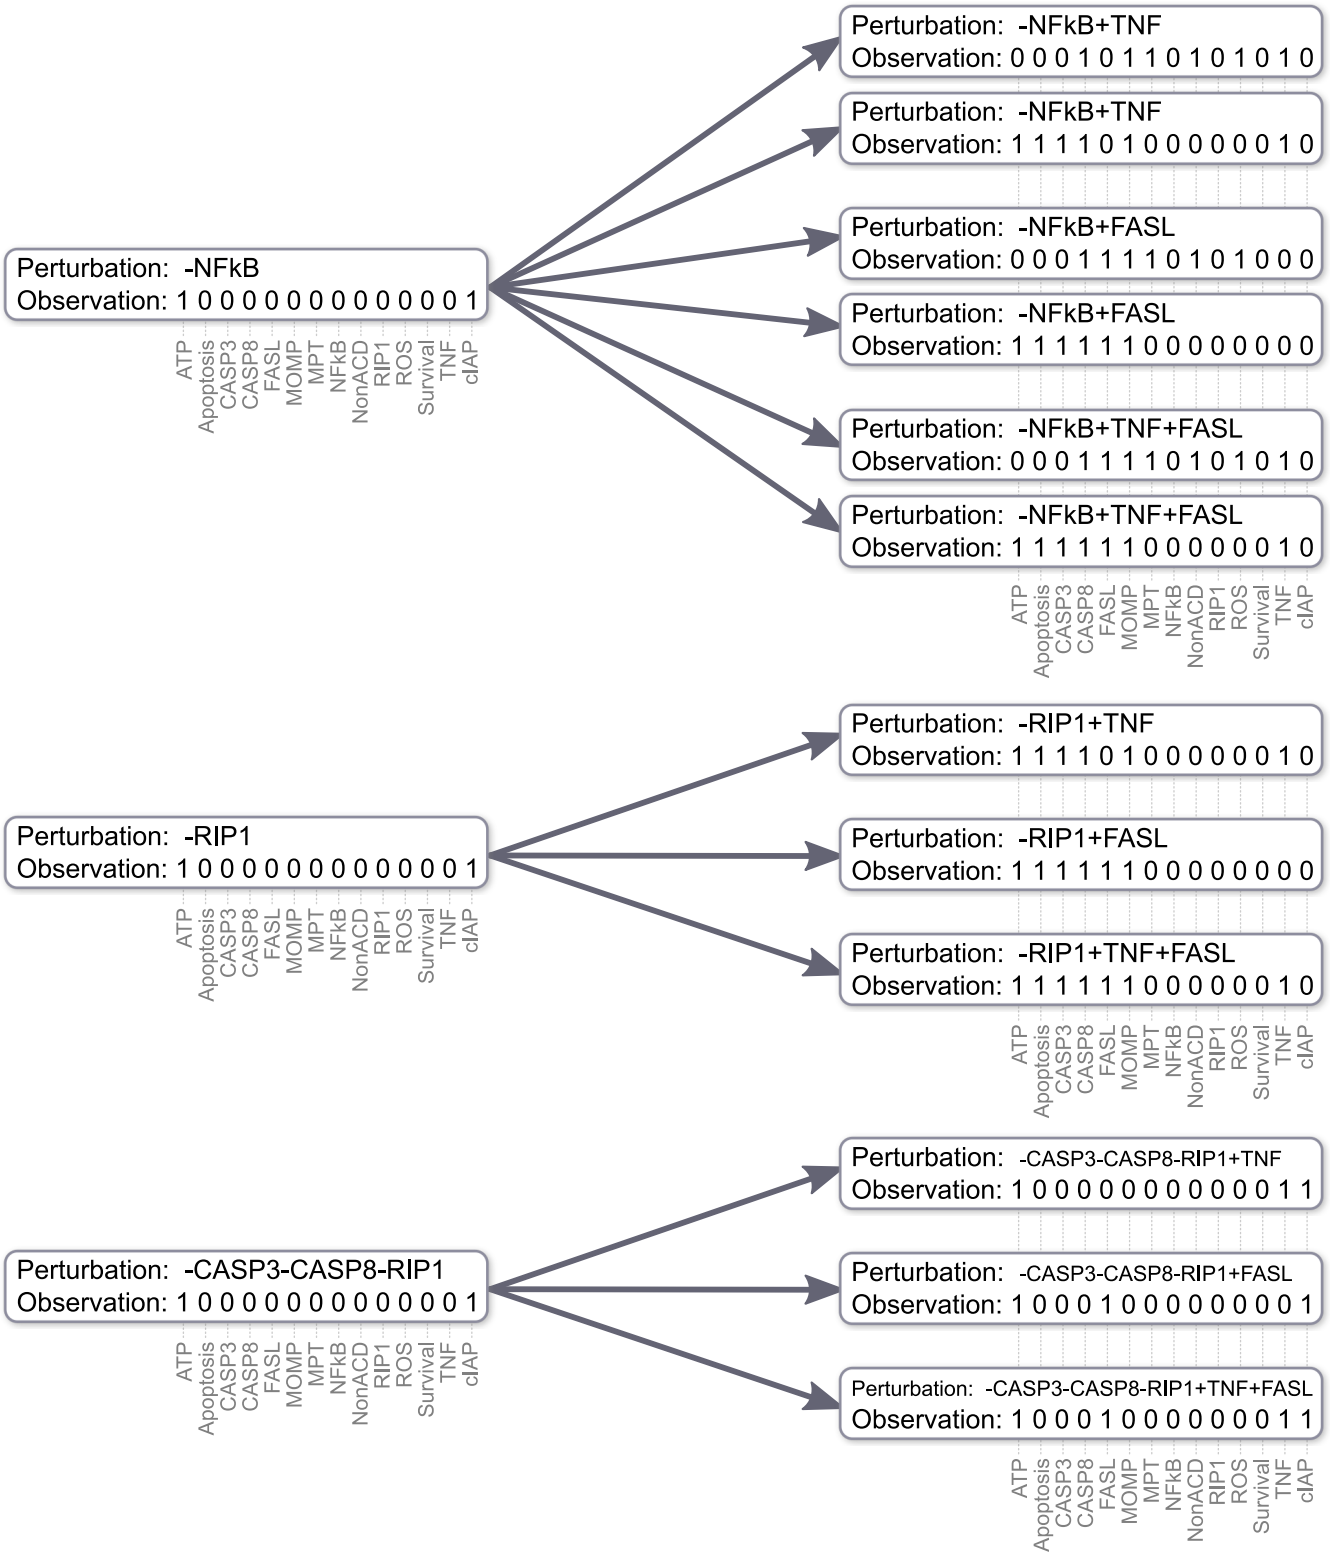

## Cell-fate decision model: training set 2 (Medium)

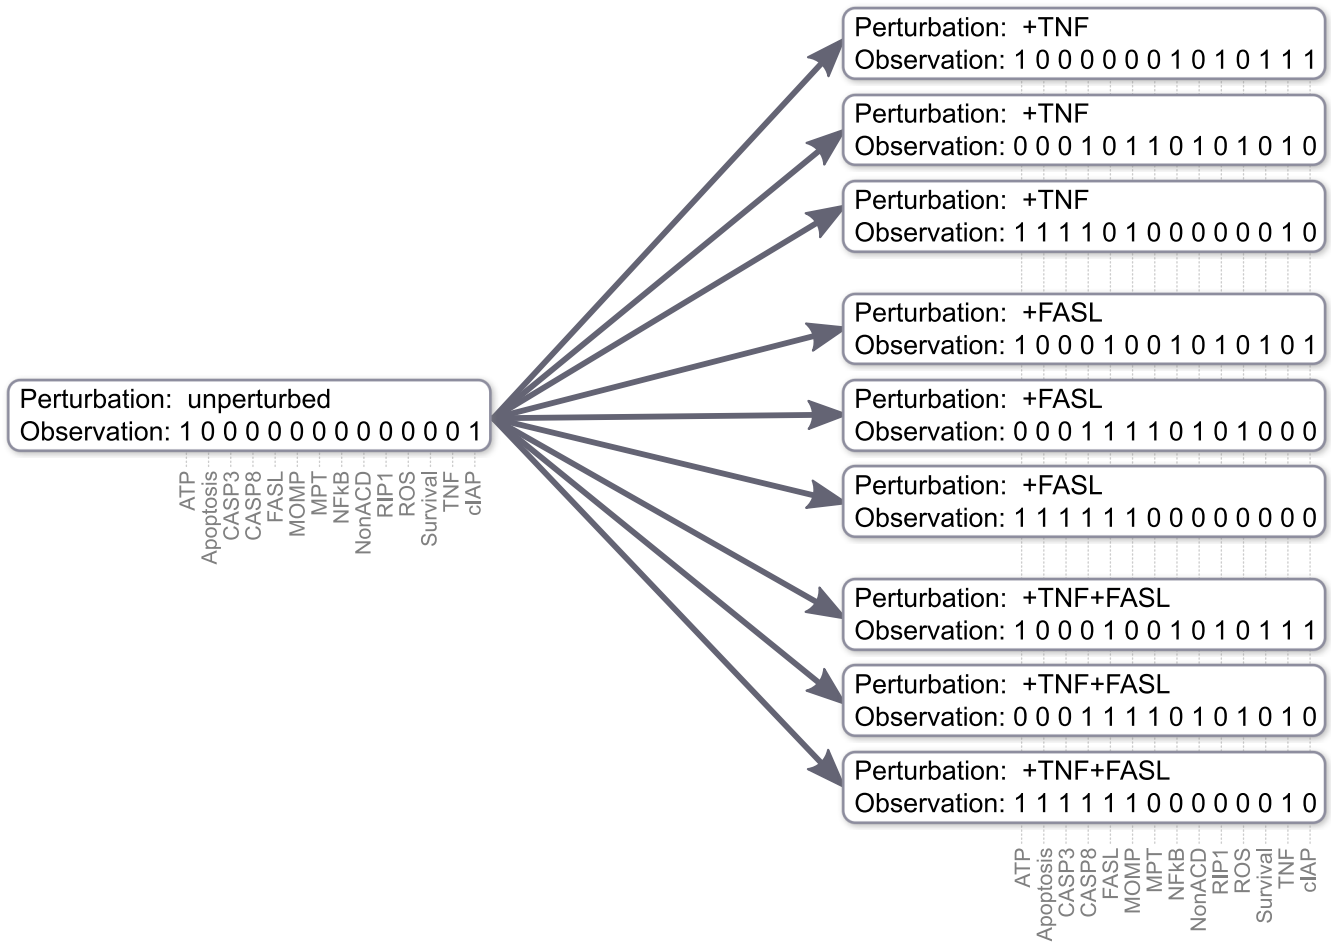

## Cell-fate decision model: training set 3 (Small)

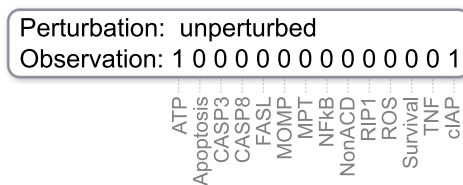

# Cell-fate decision model: training set 1 (Large) with 10% error

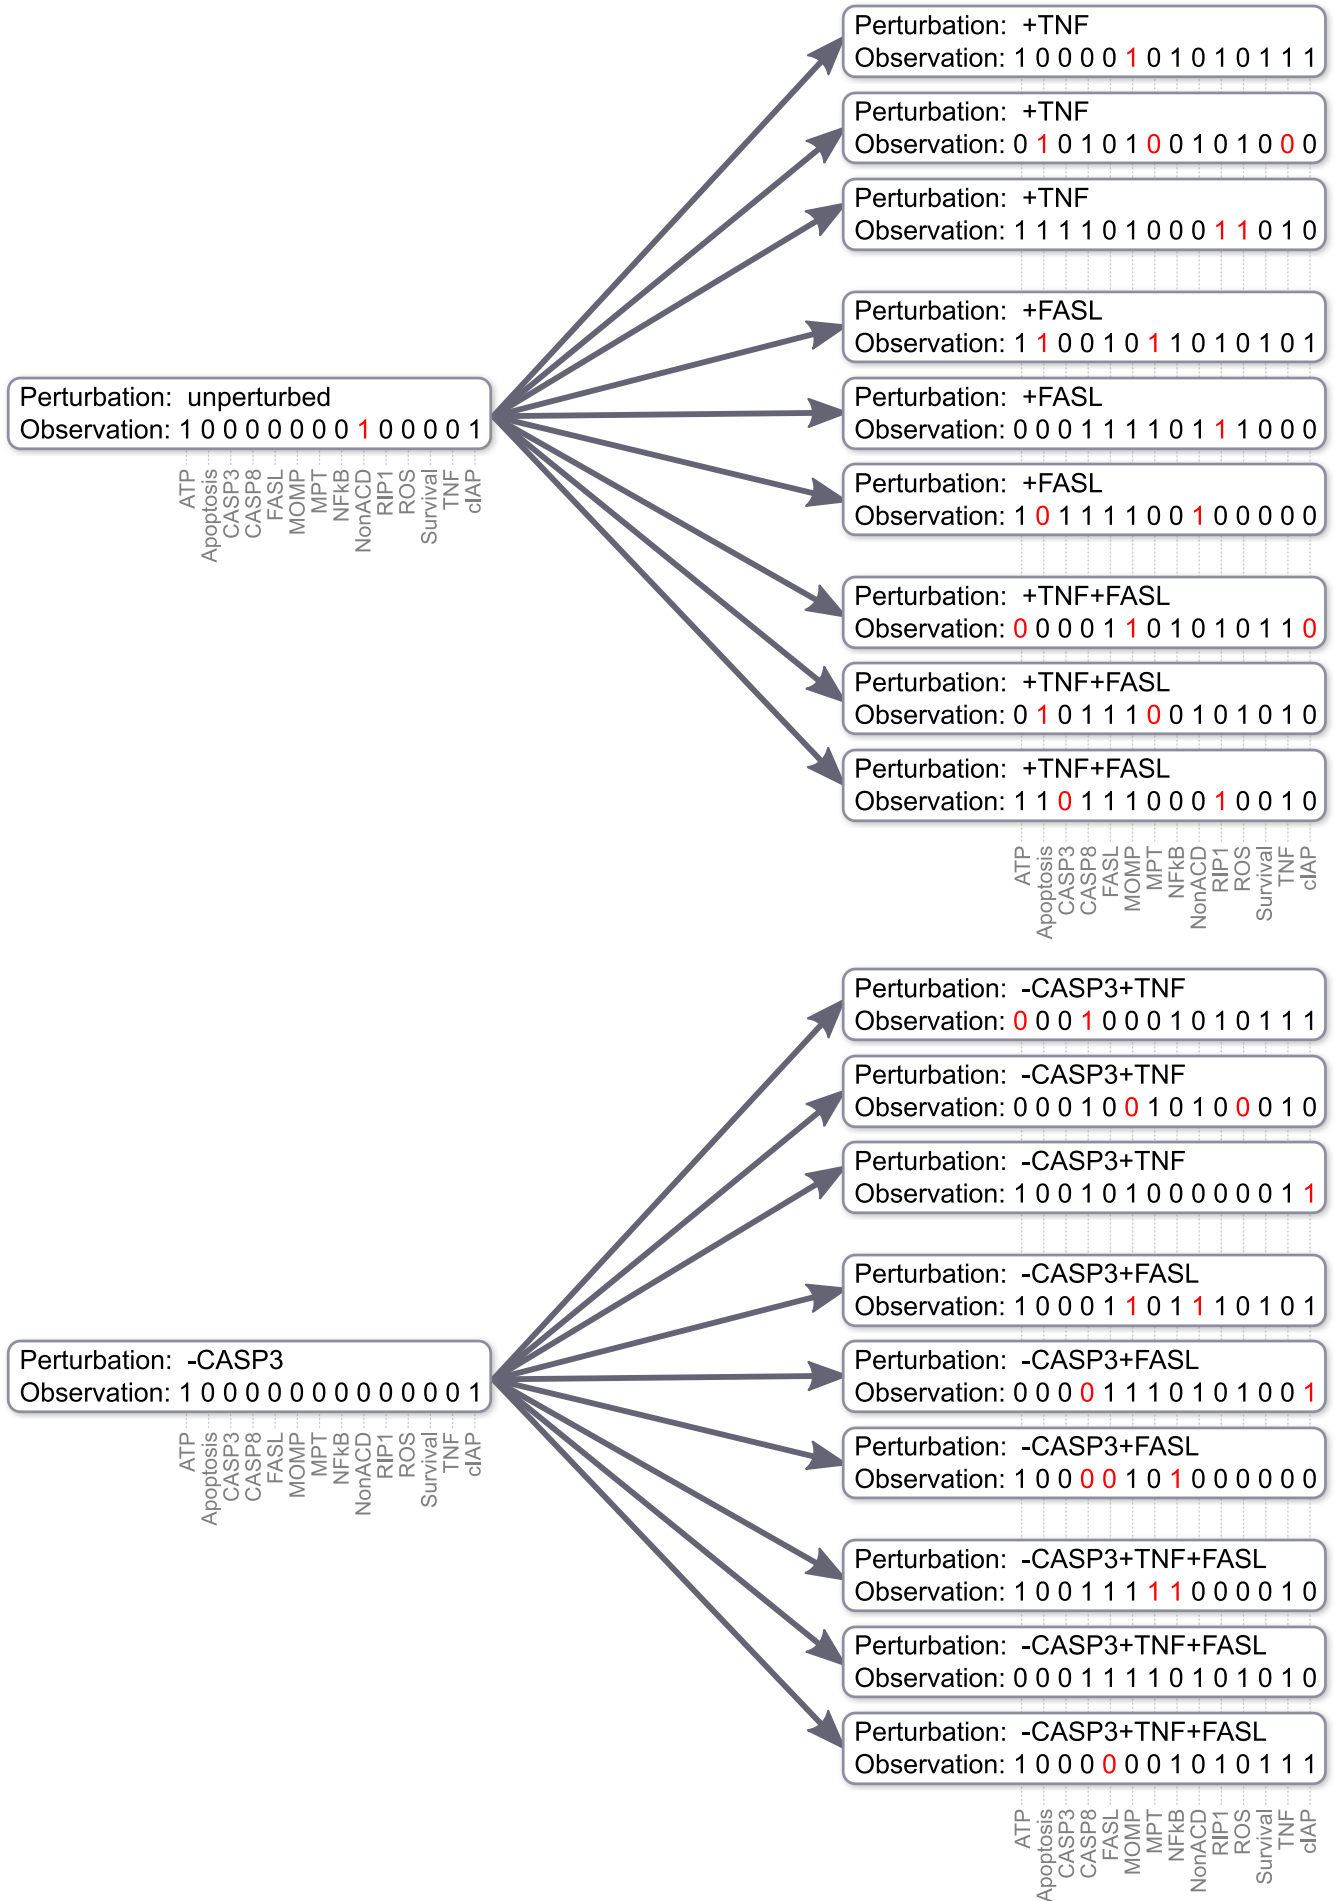

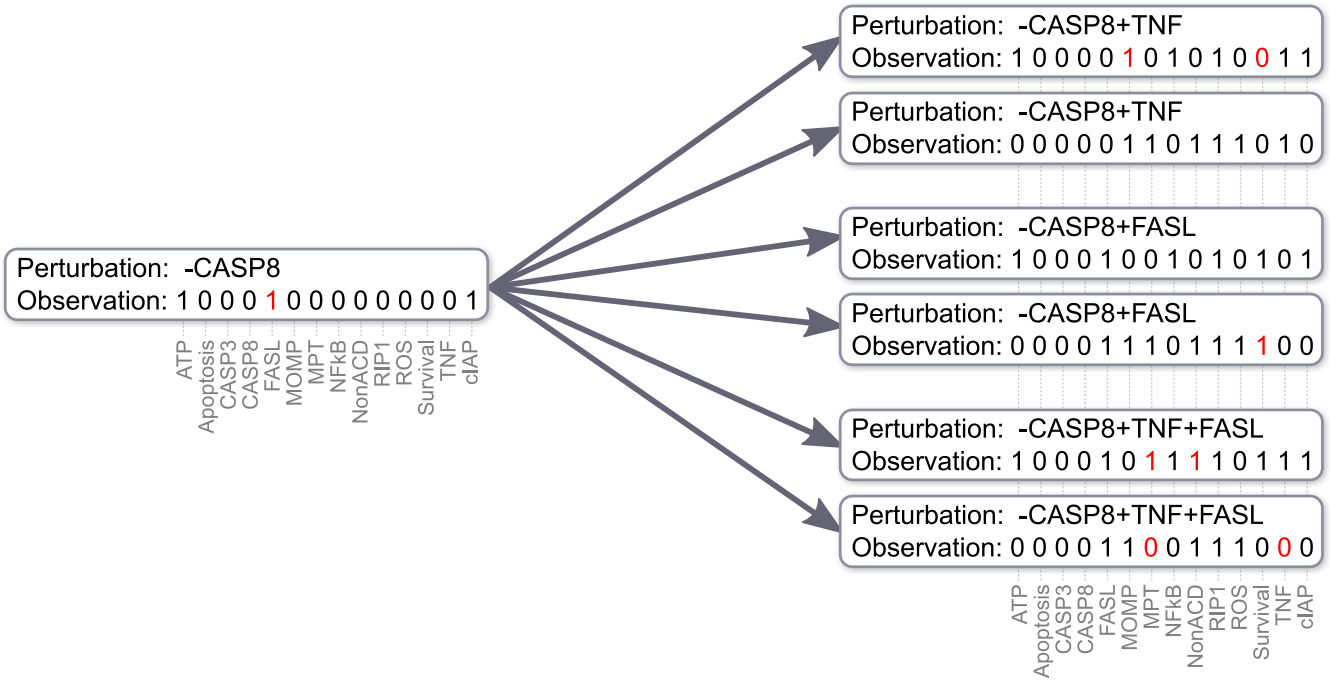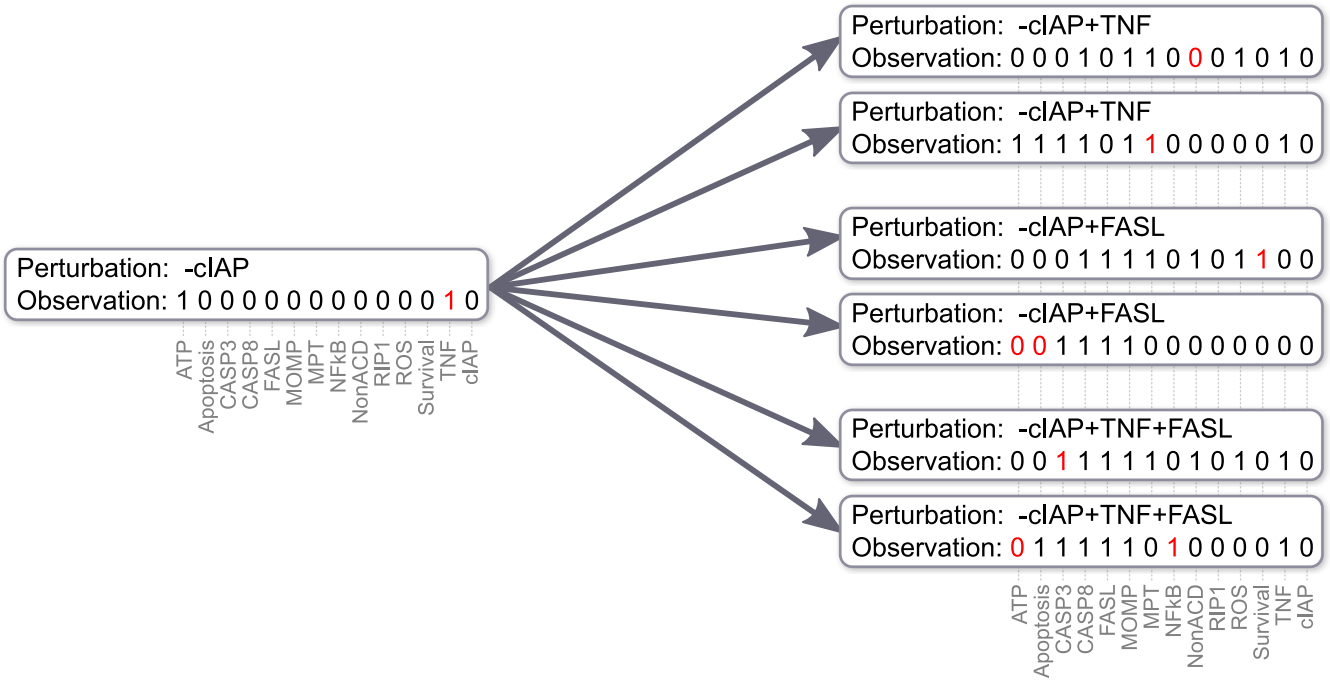

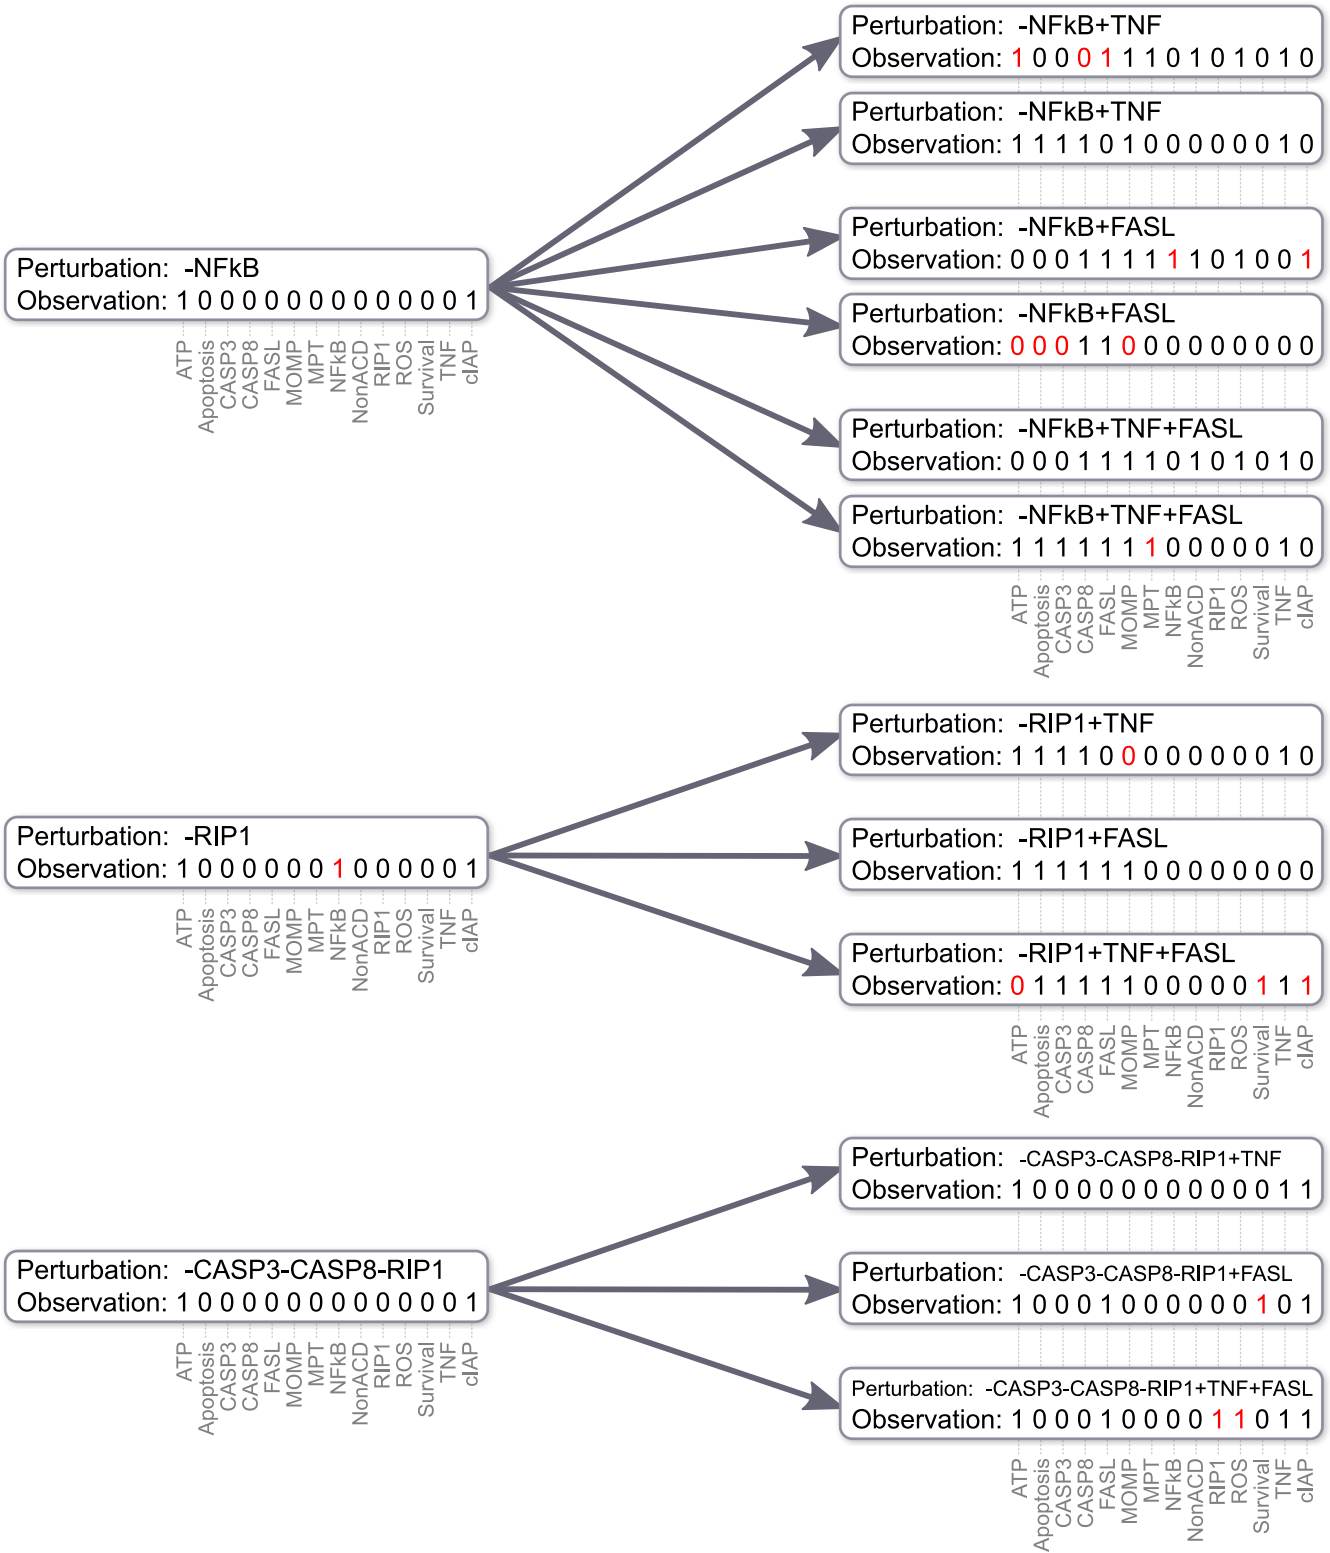

# Cell-fate decision model: training set 1 (Large) with 20% error

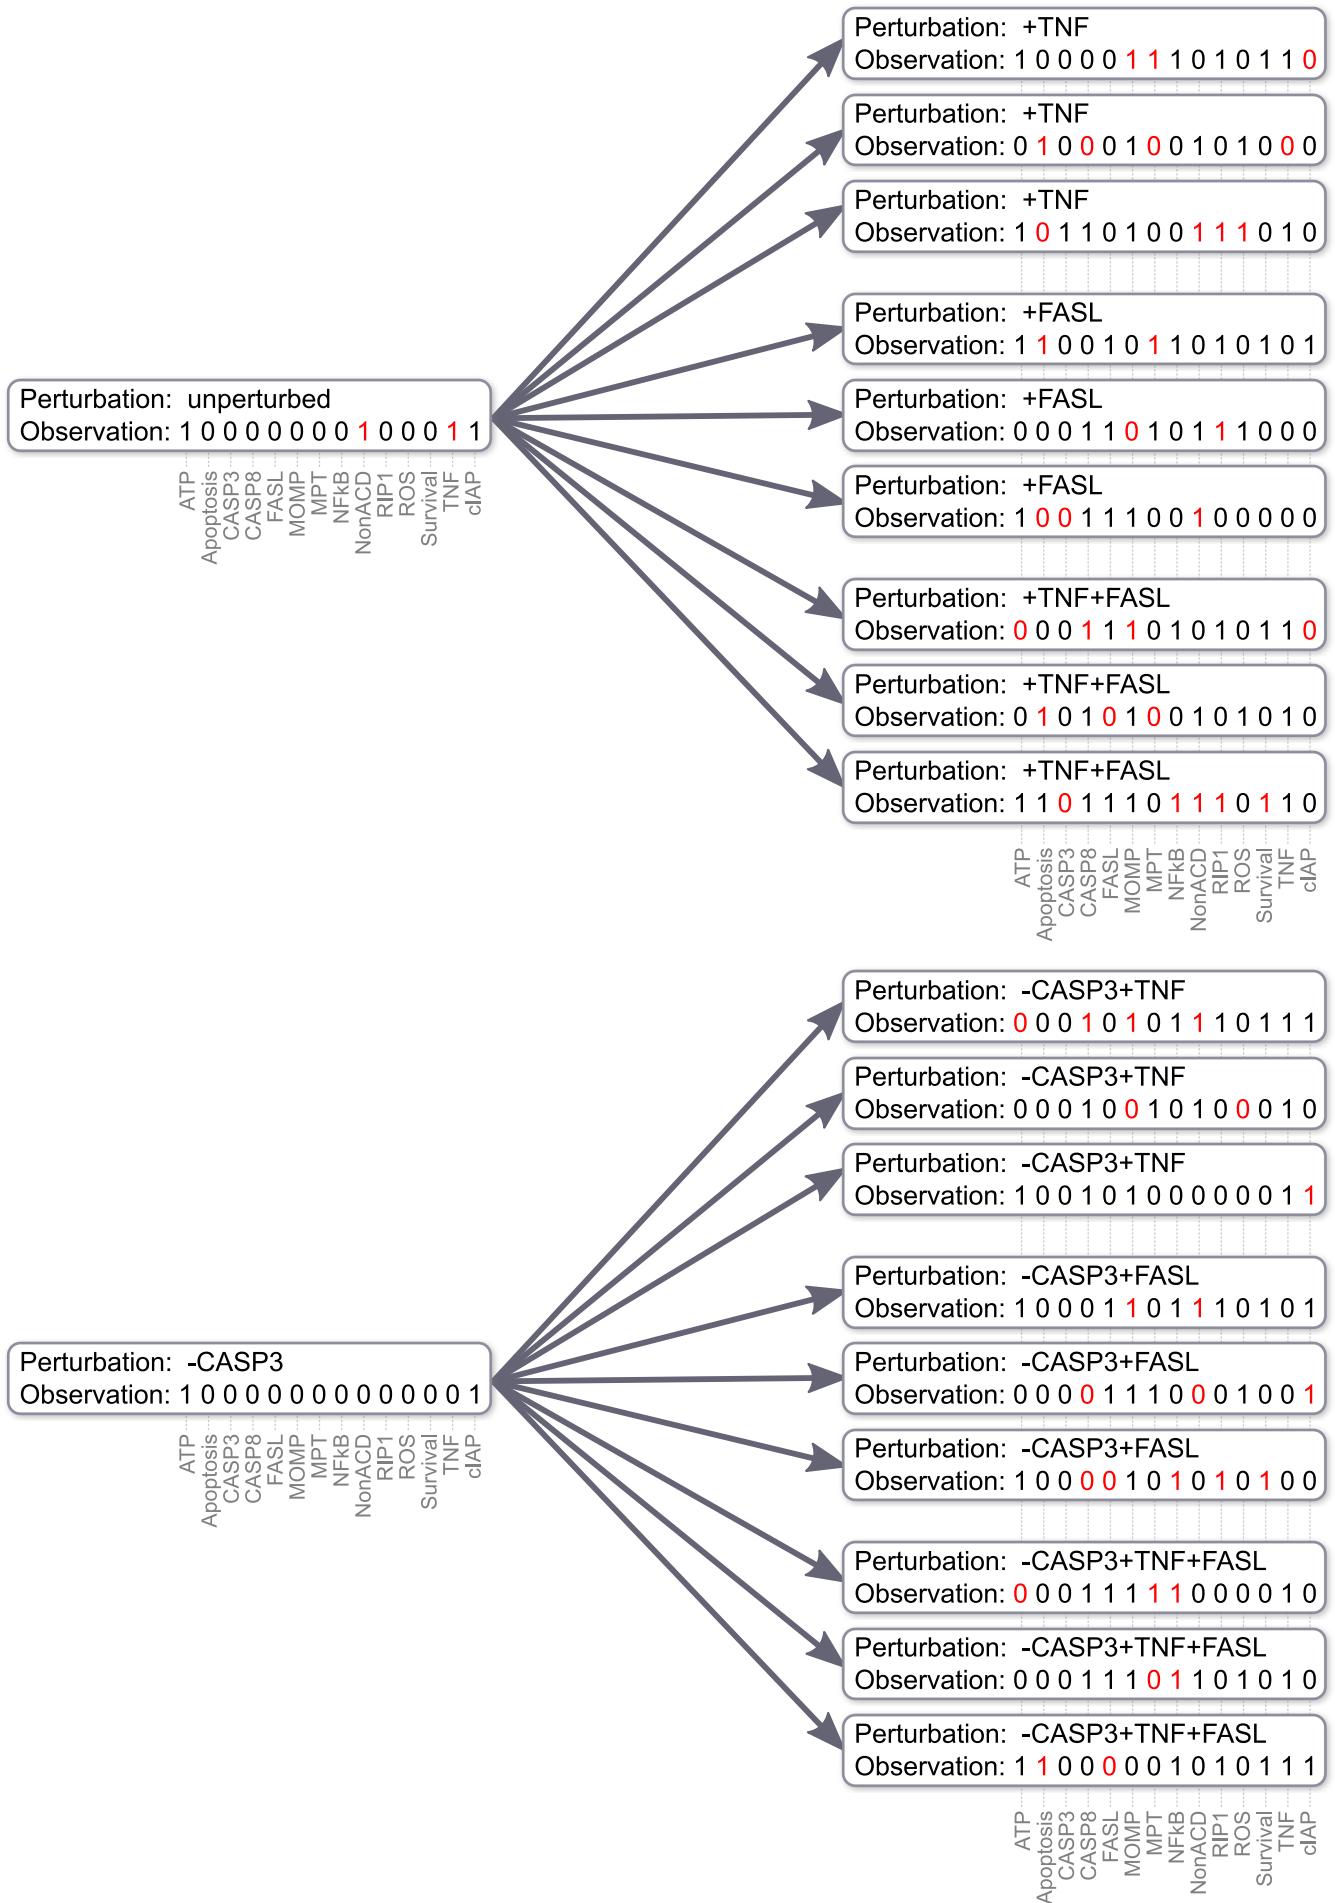



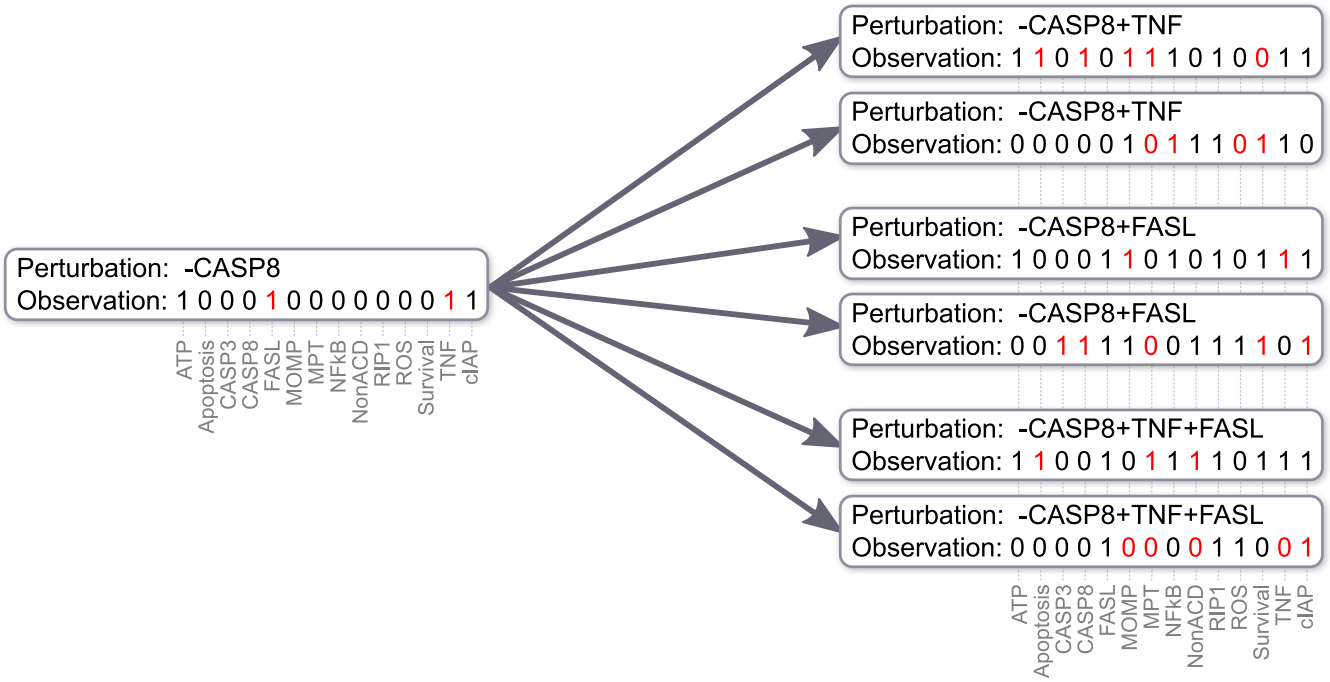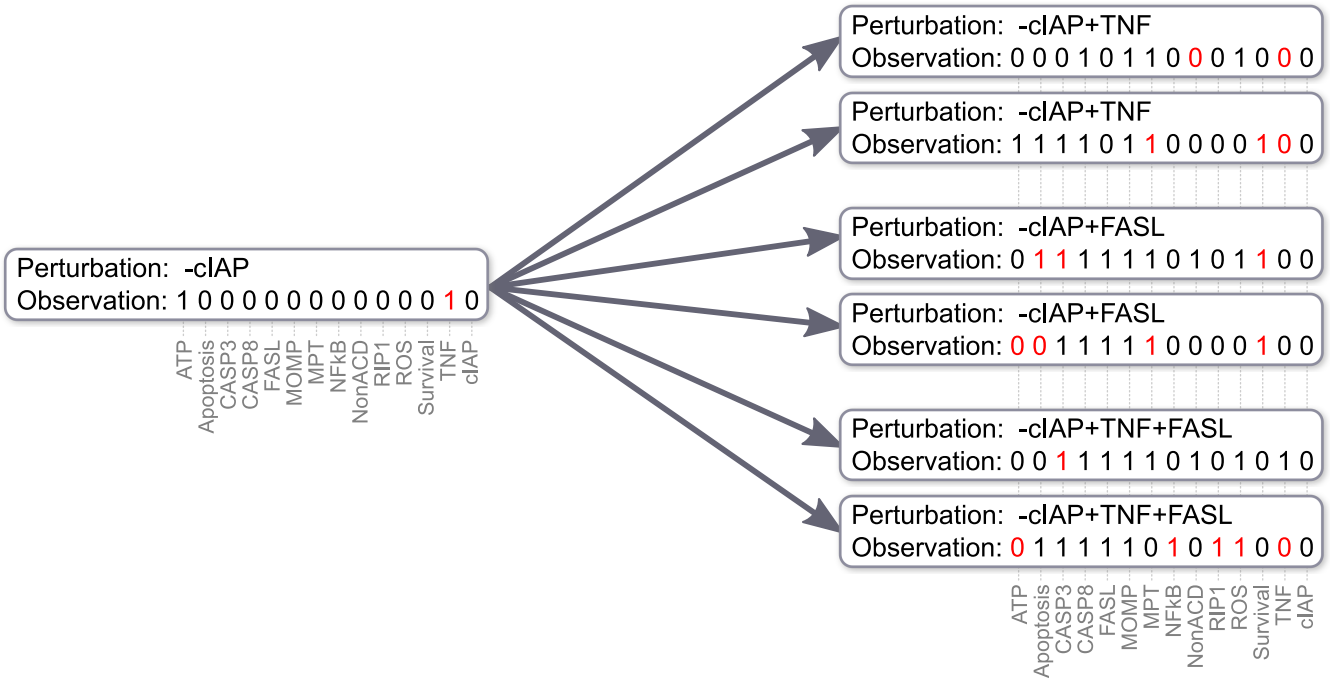

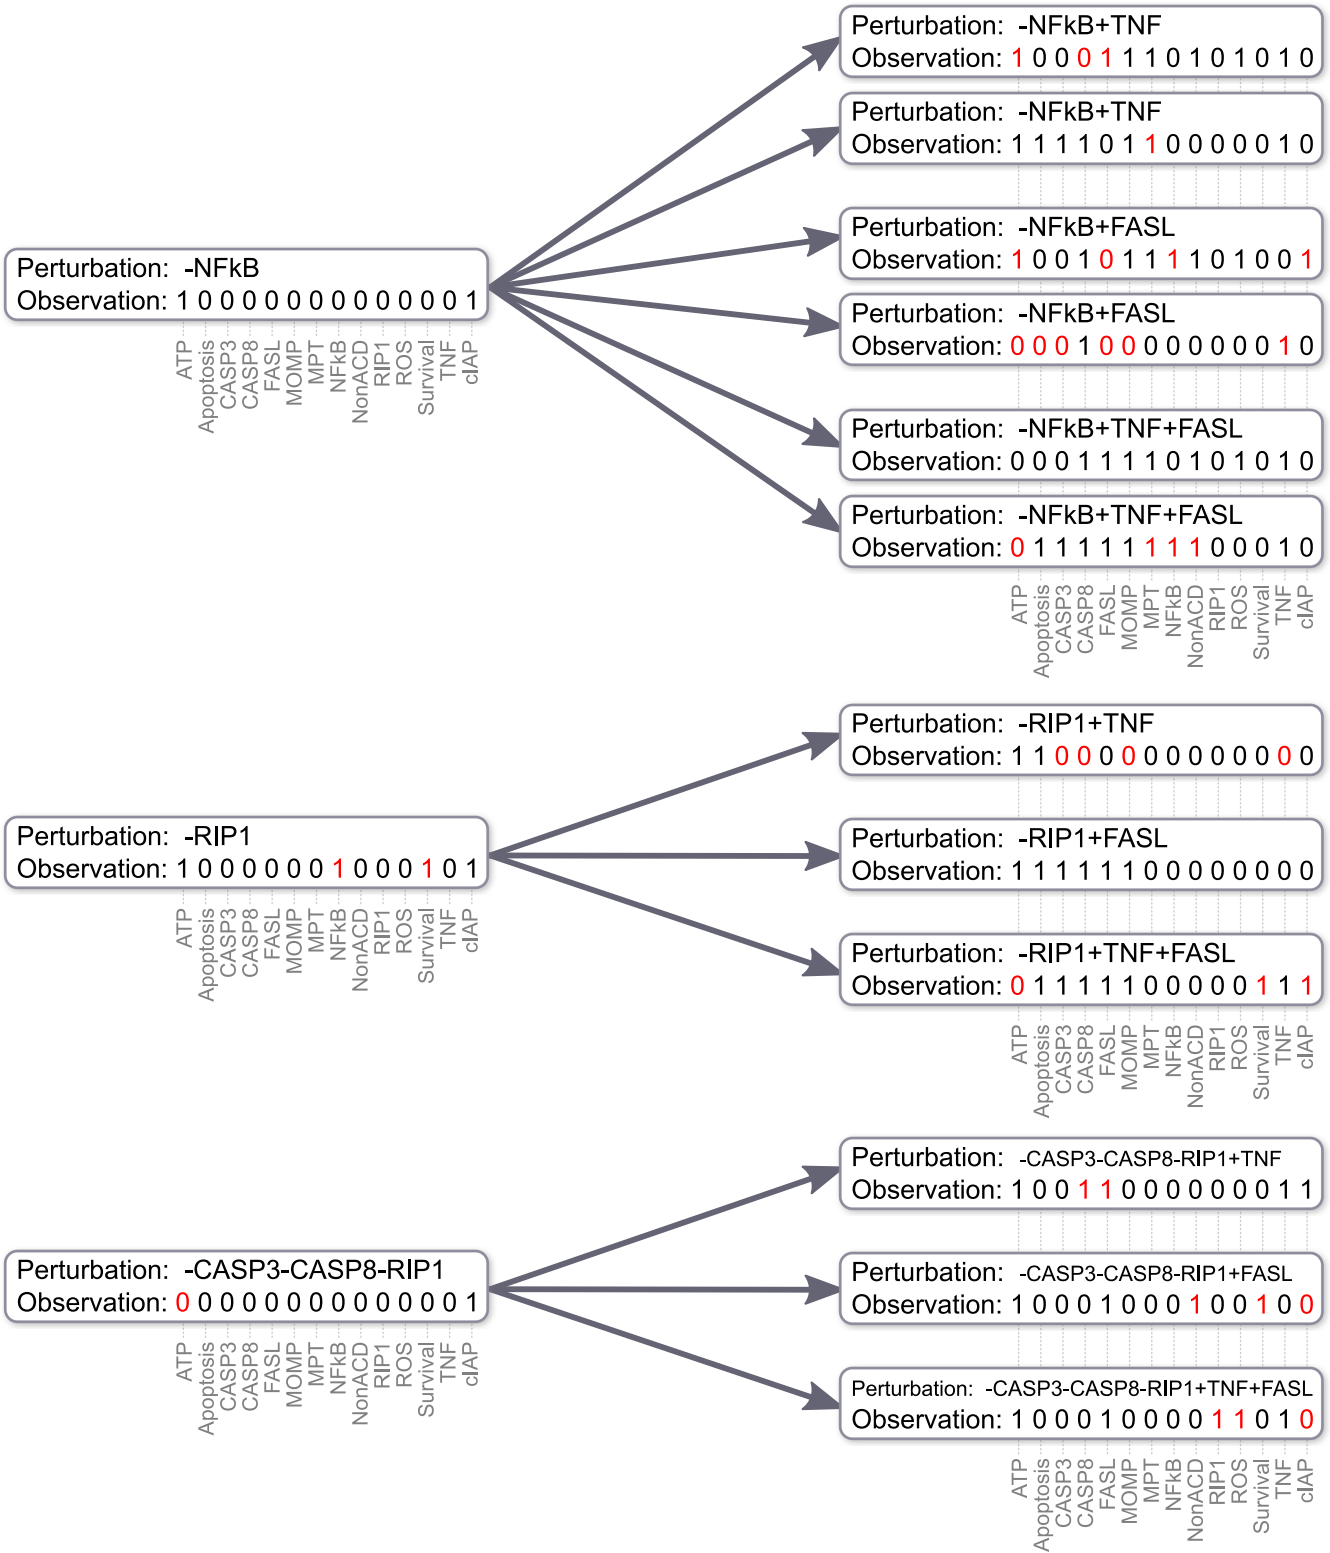

# Cell-fate decision model: training set 1 (Large) with 30% error

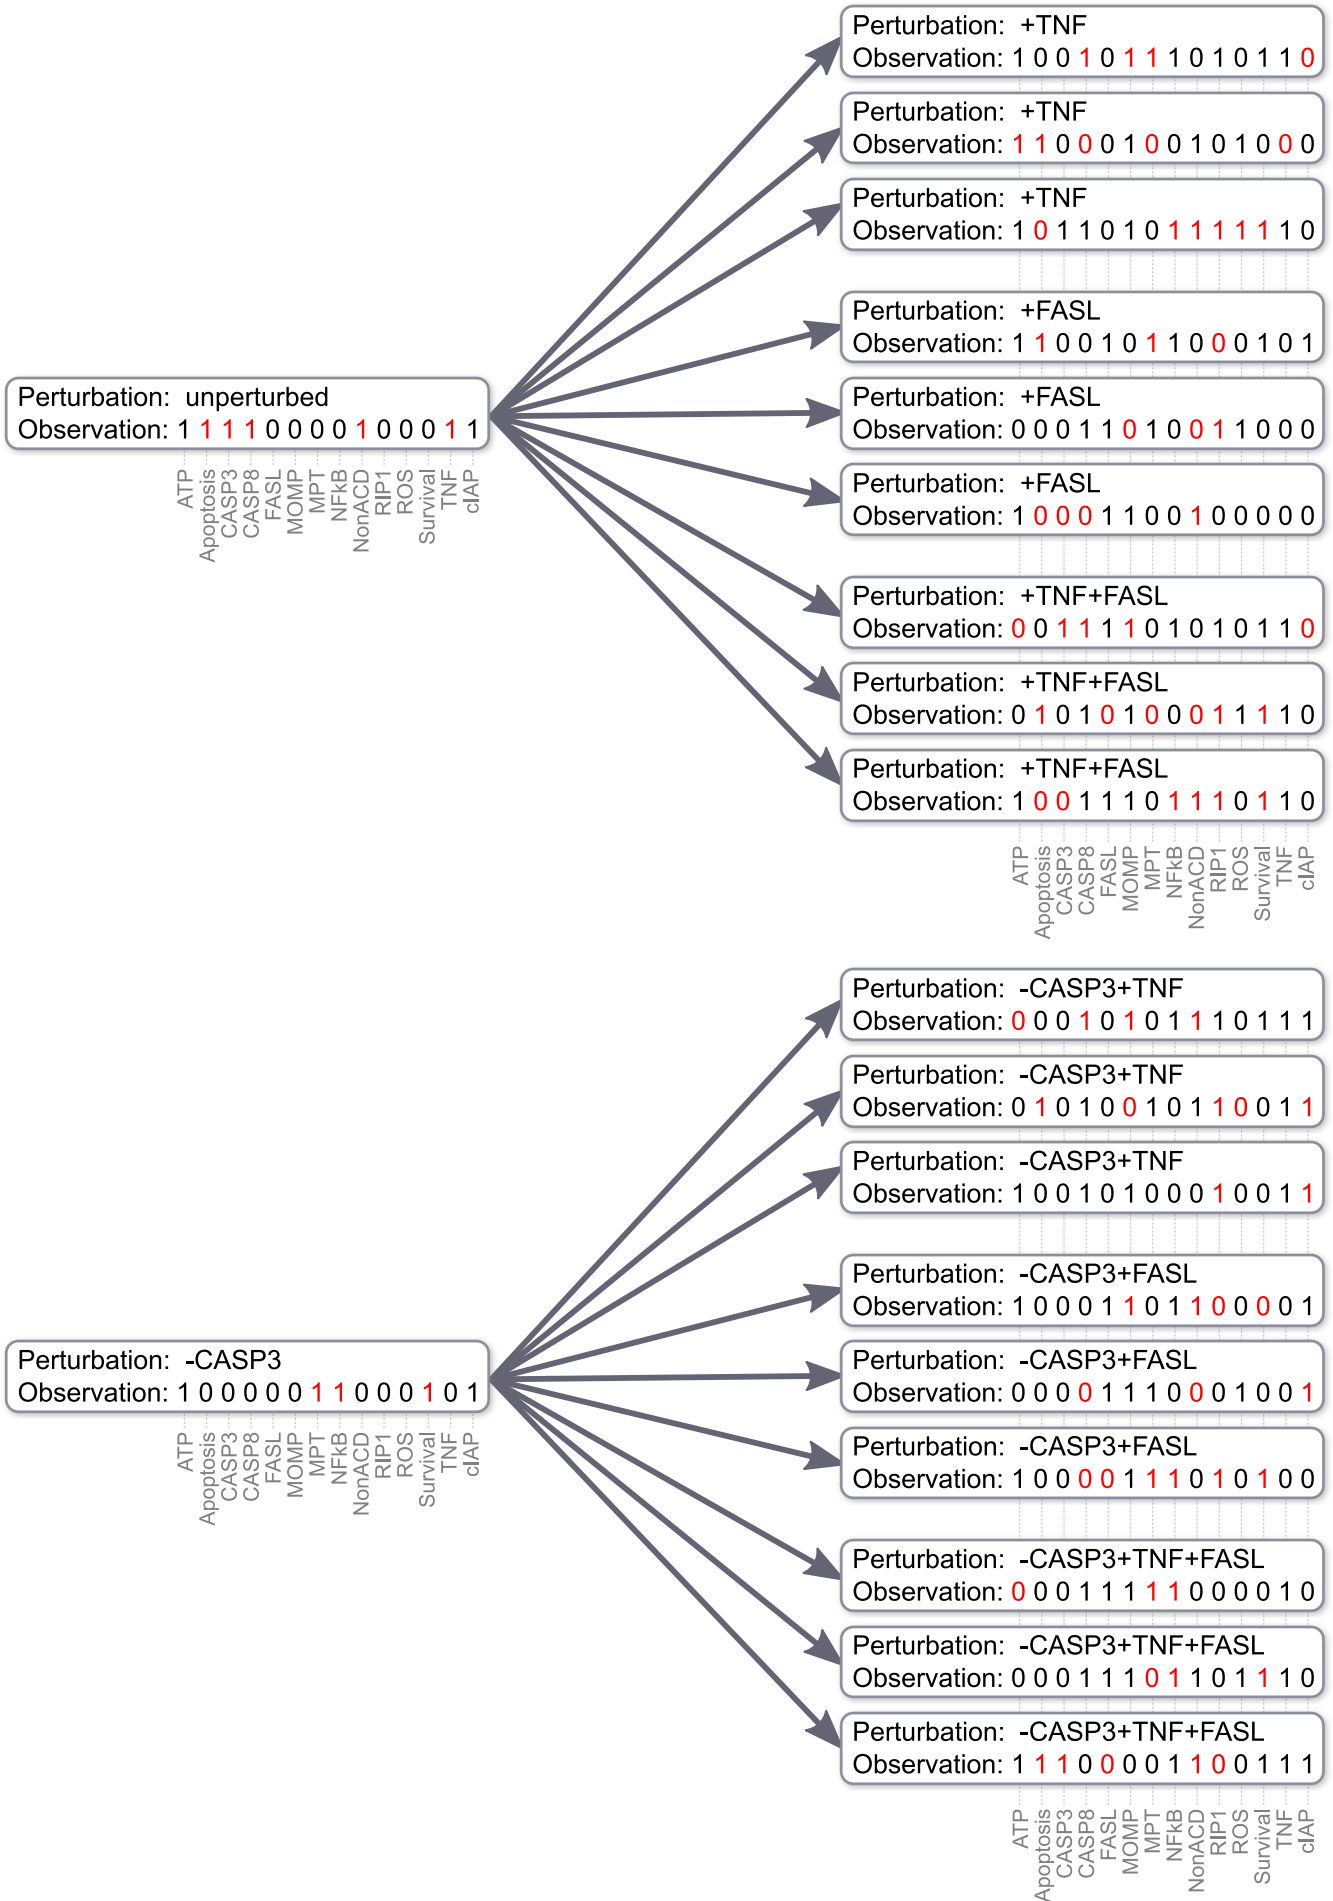

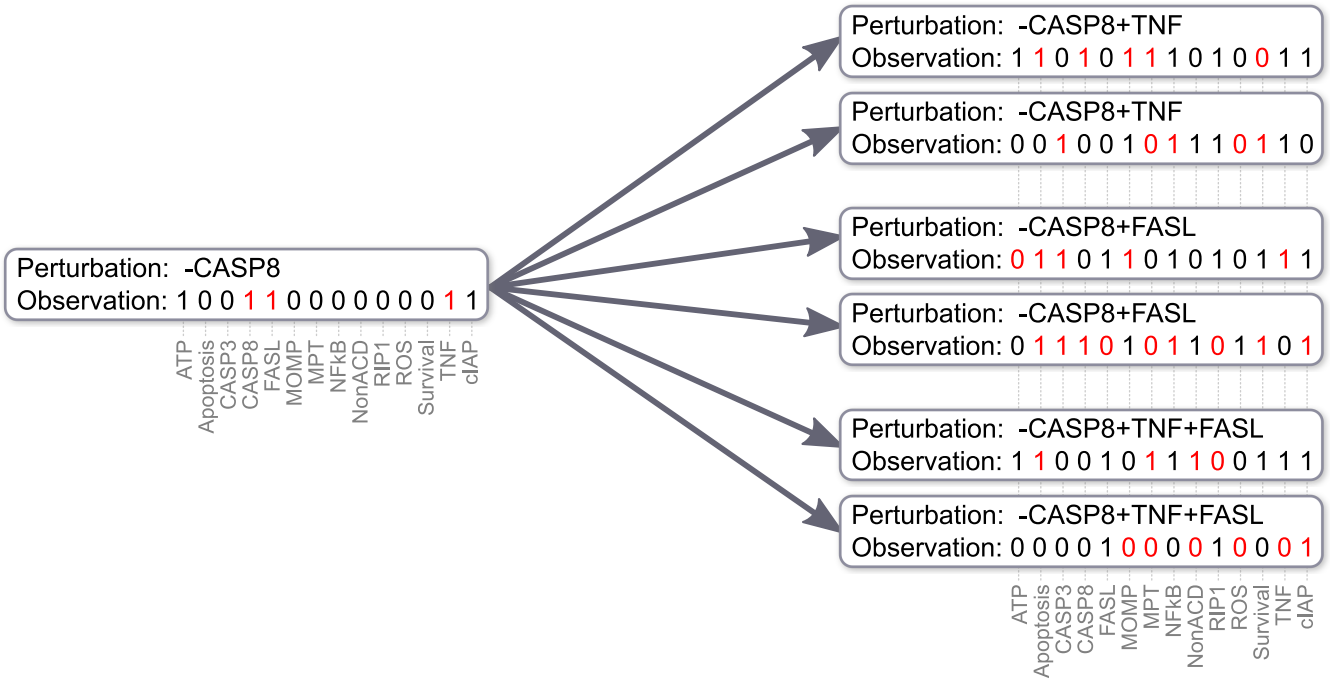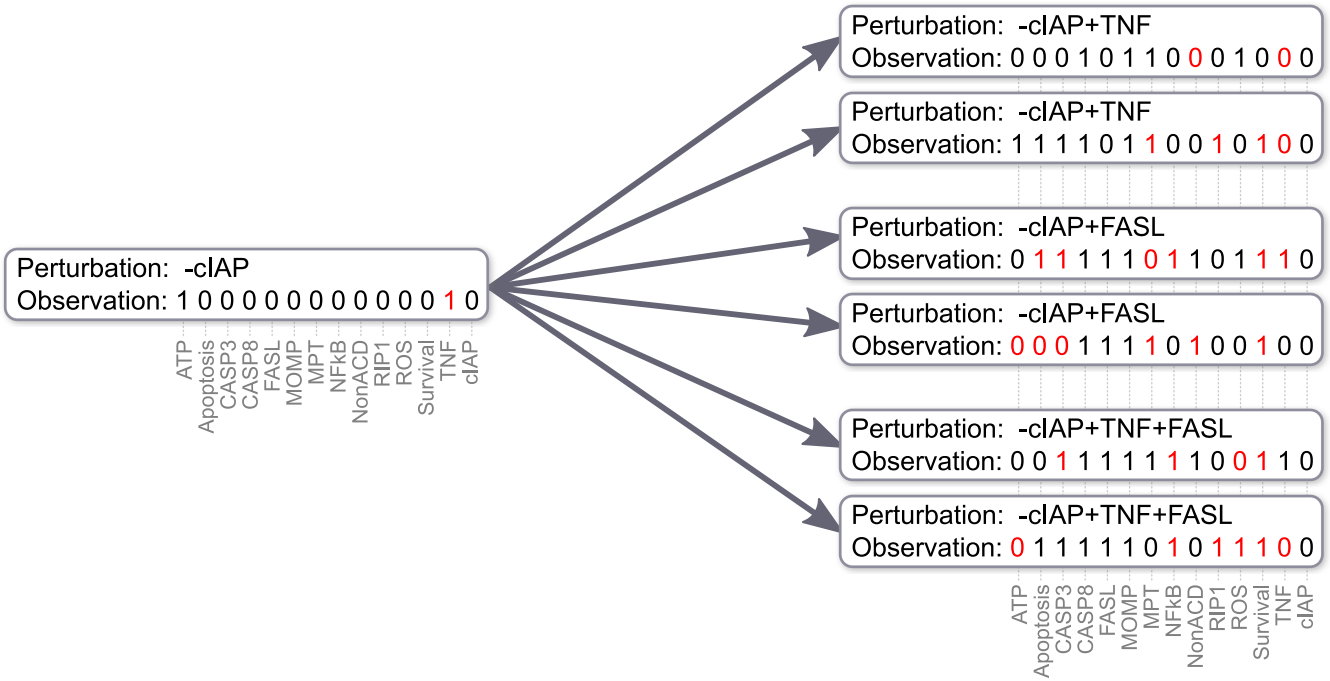

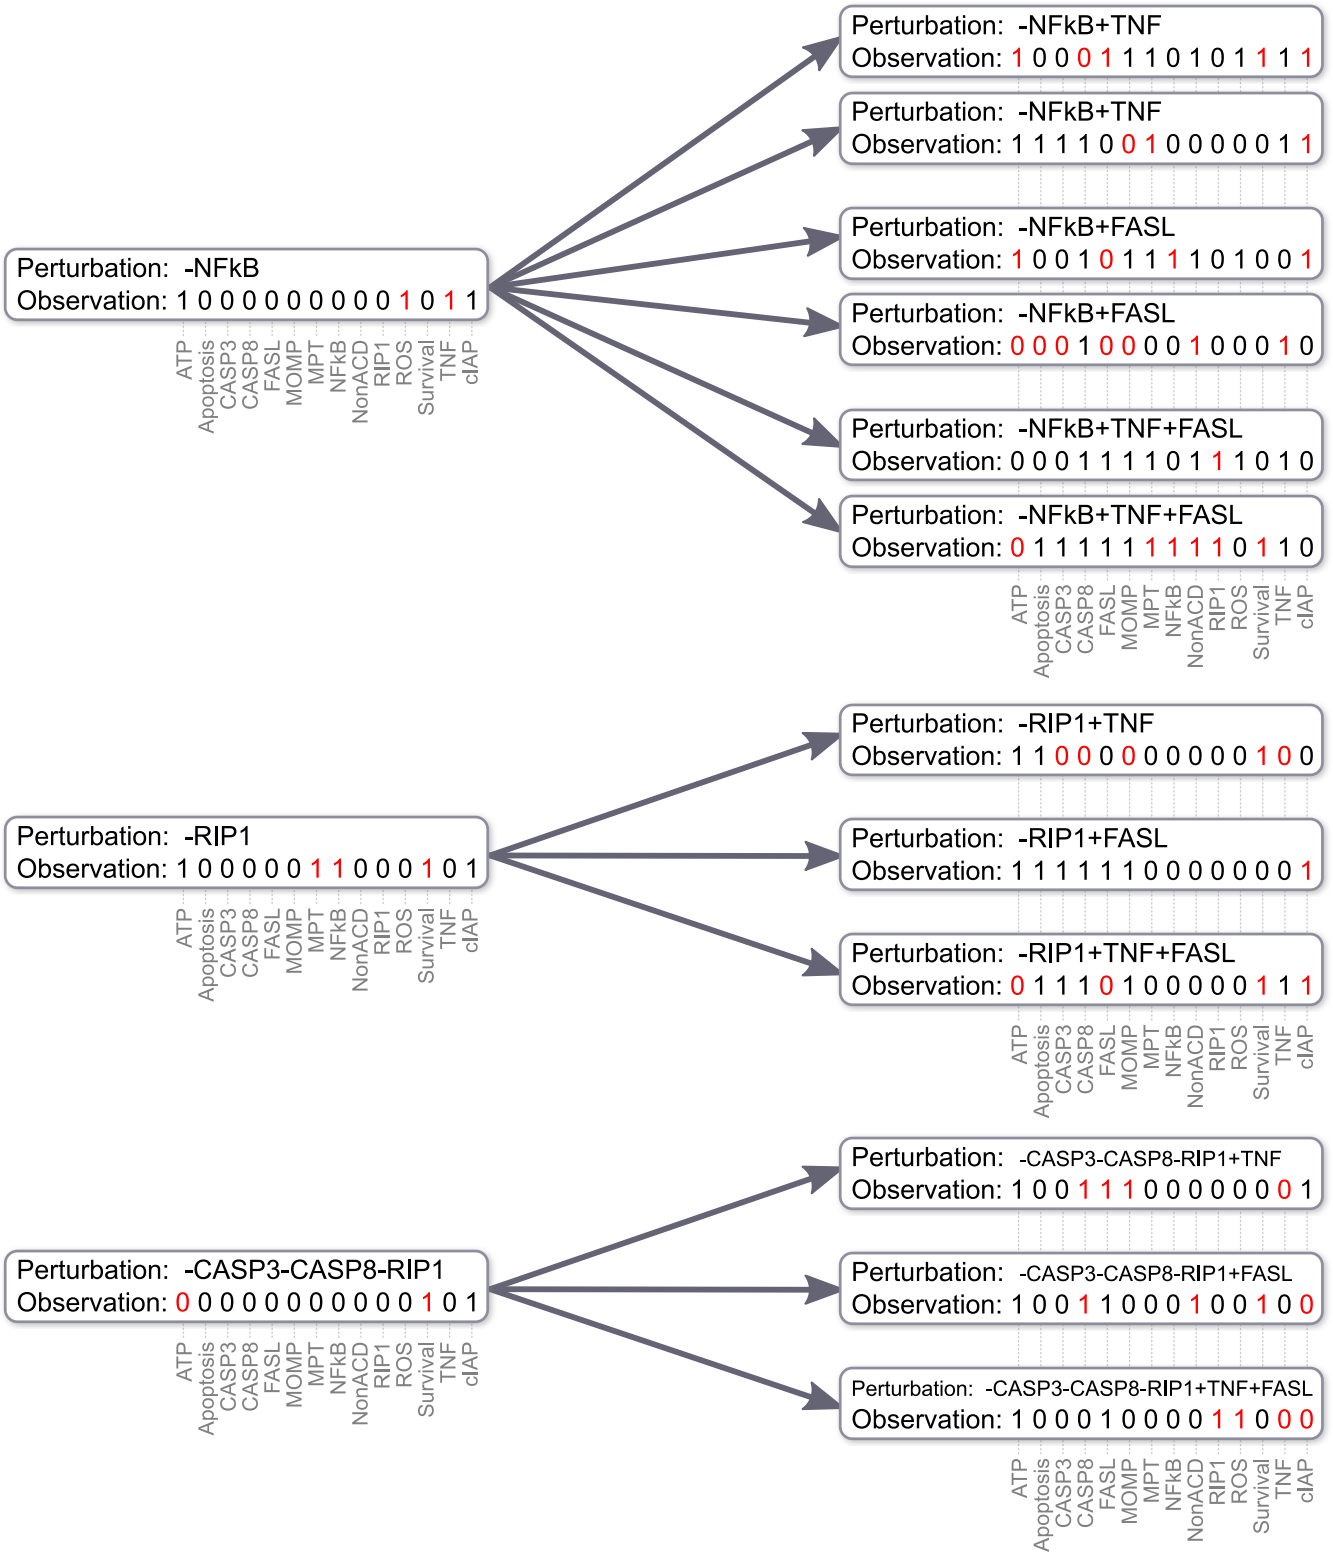

# Cell-fate decision model: training set 1 (Large) with 40% error

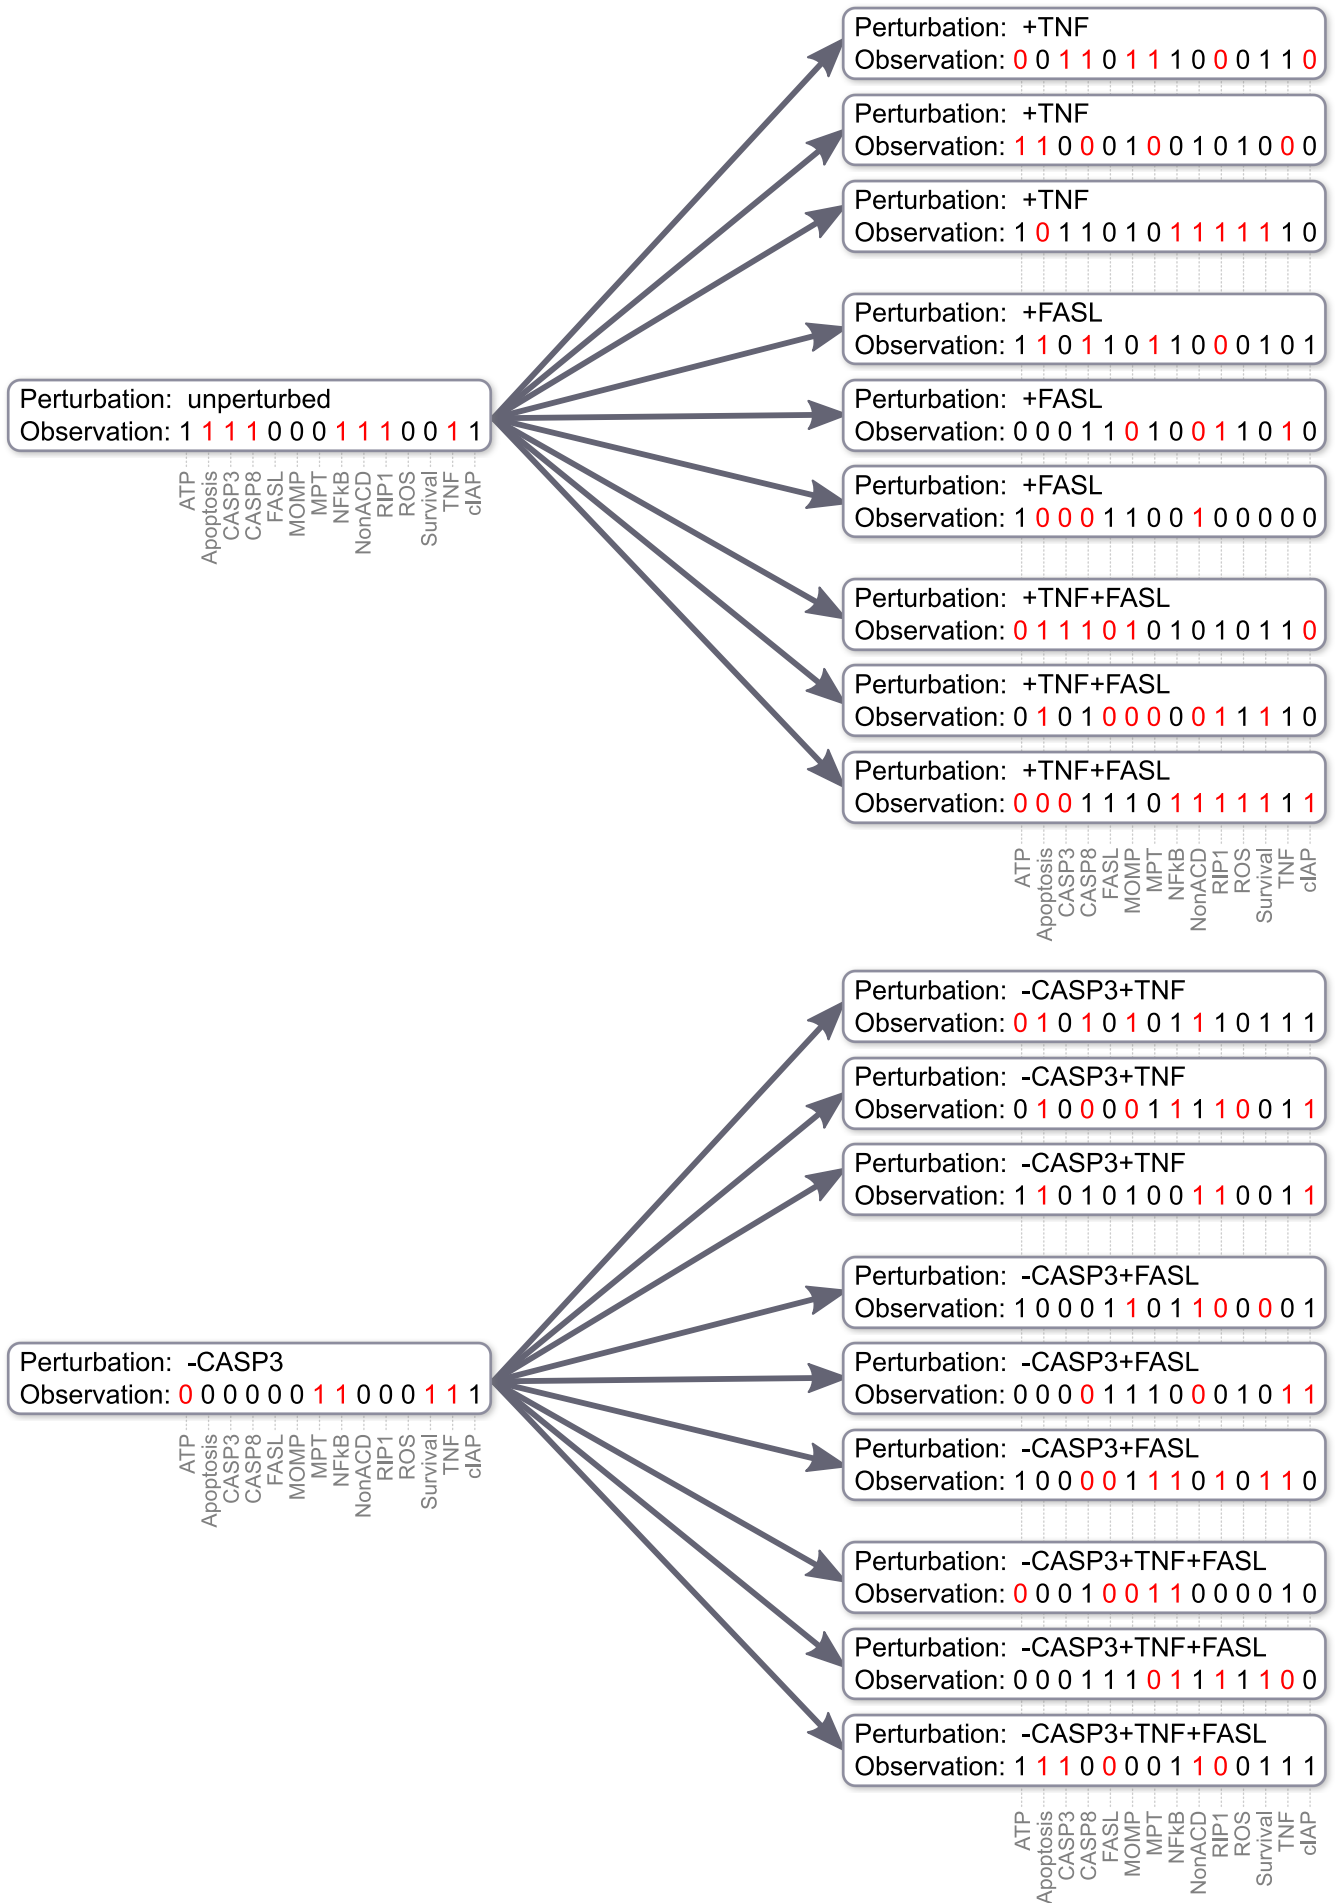

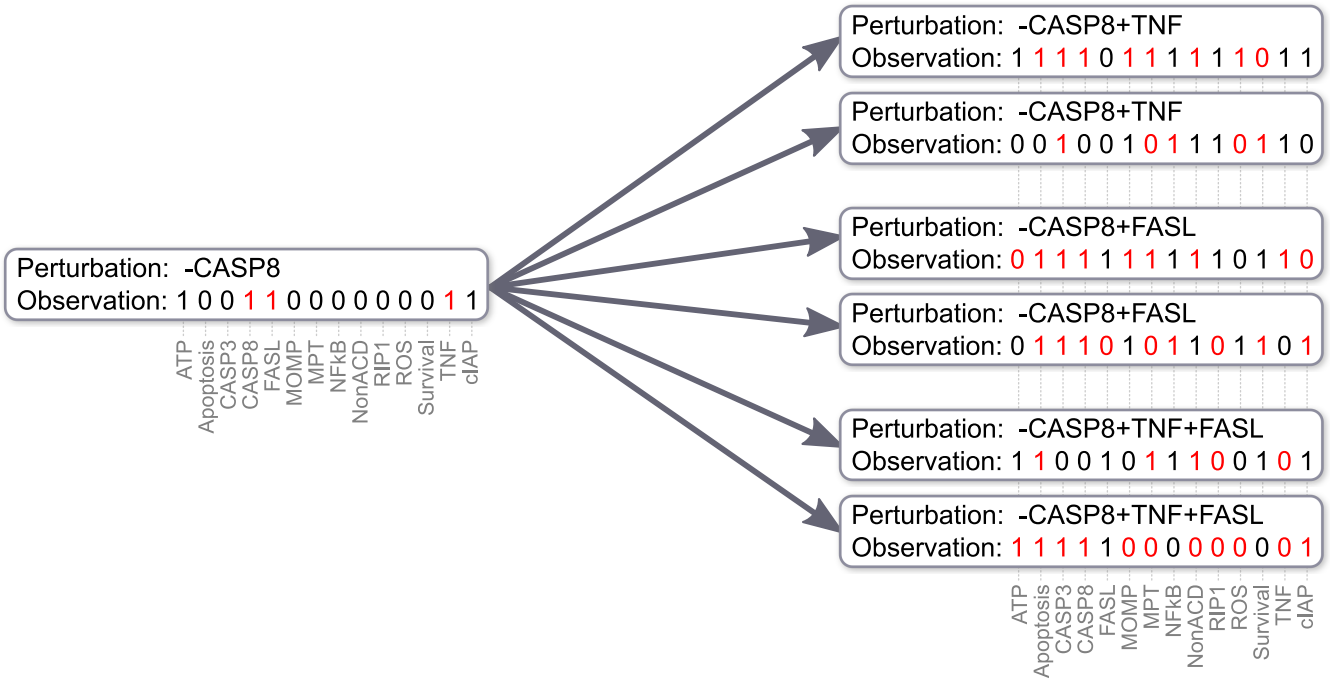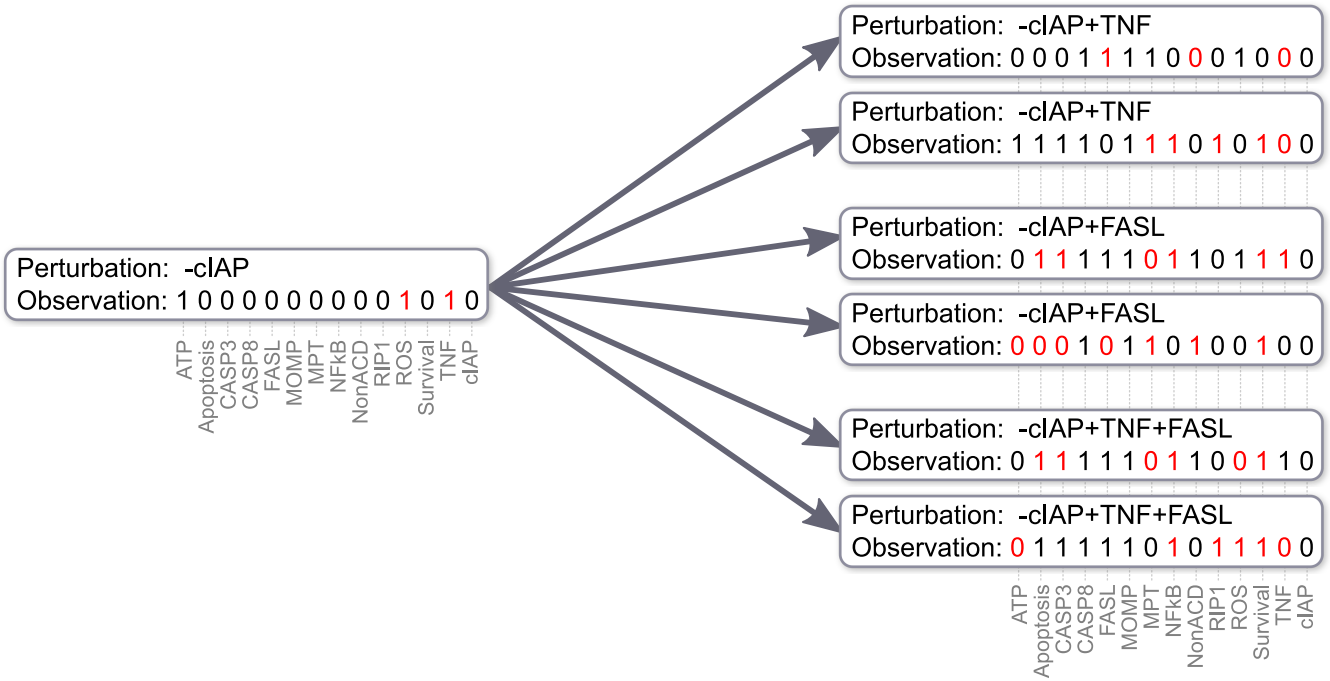

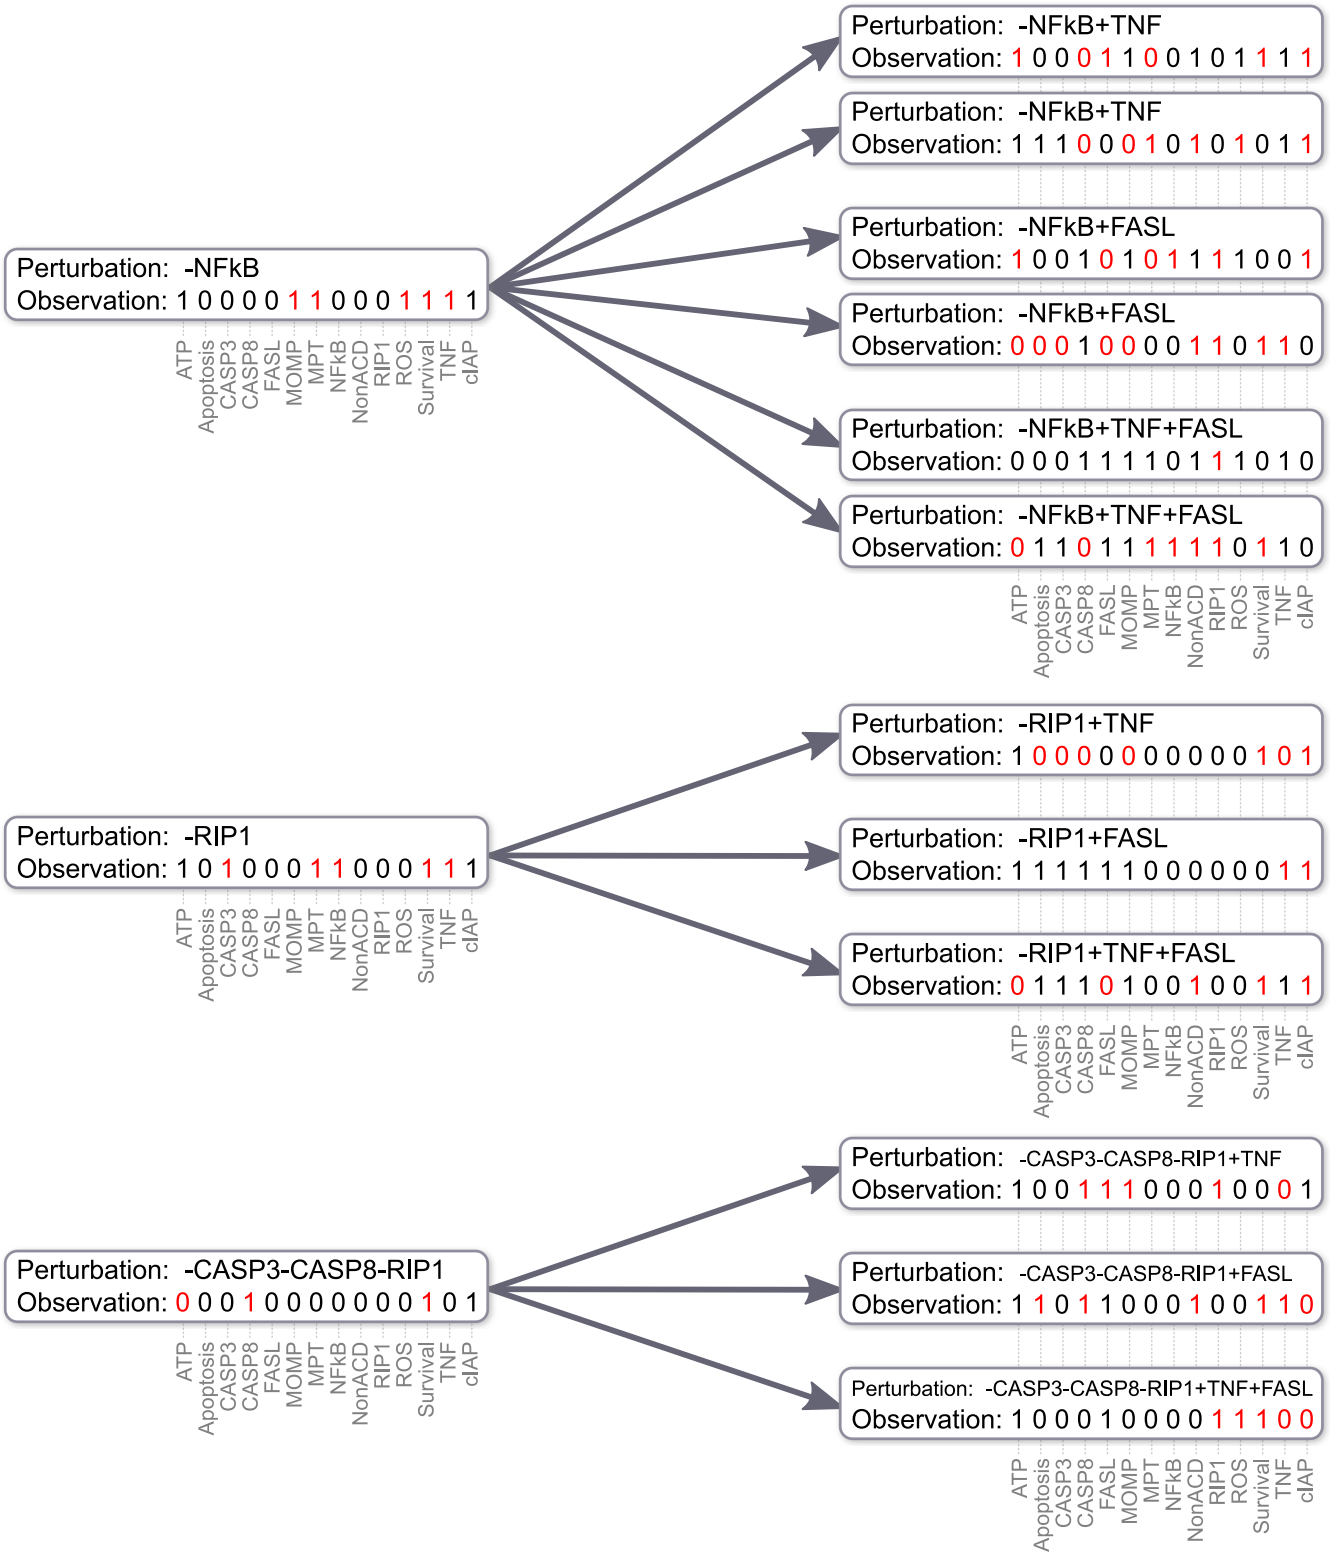



# Cell-fate decision model: training set 1 (Large) with 50% error

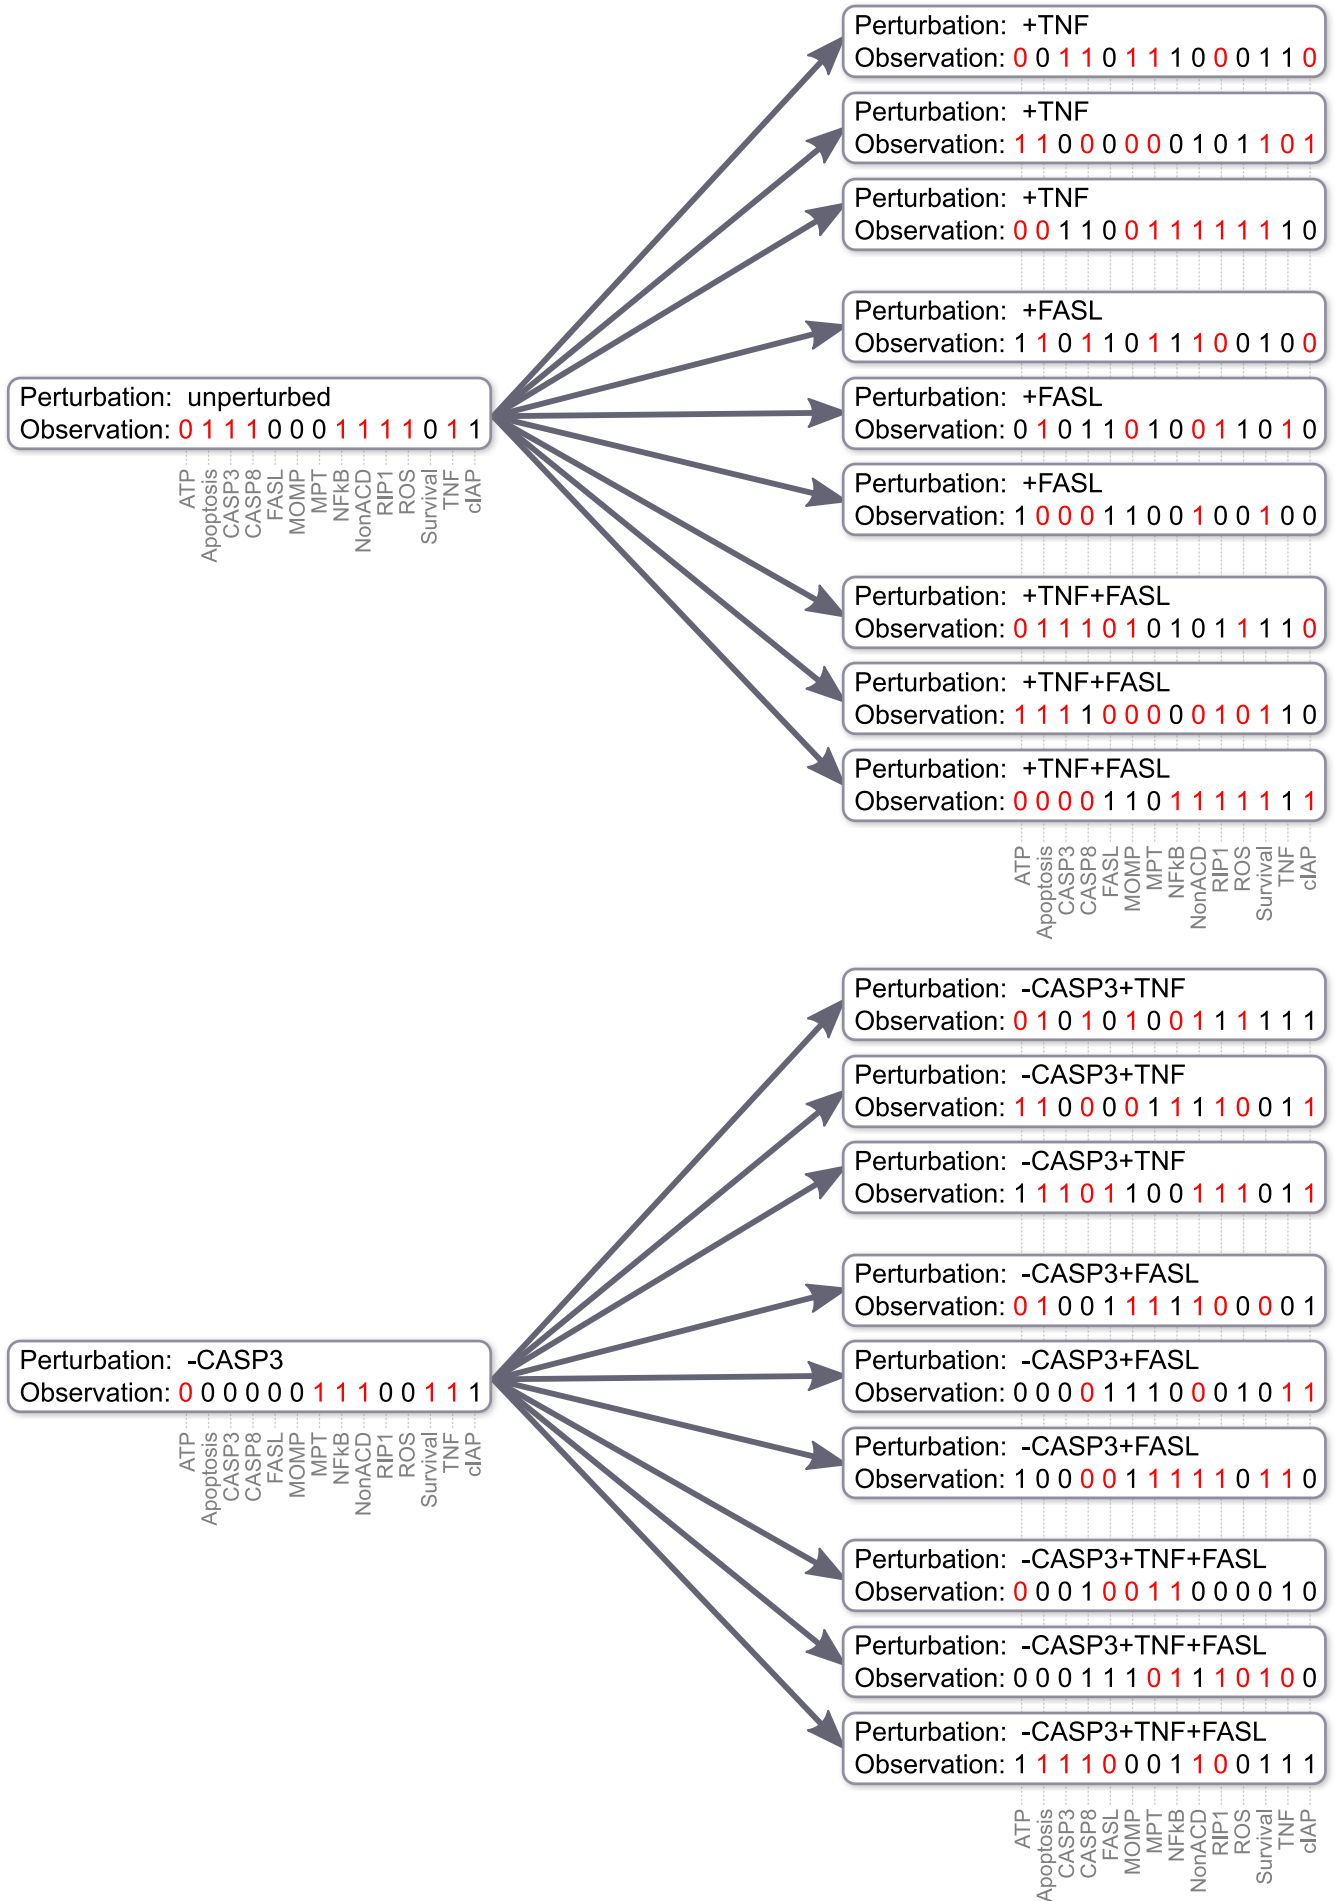

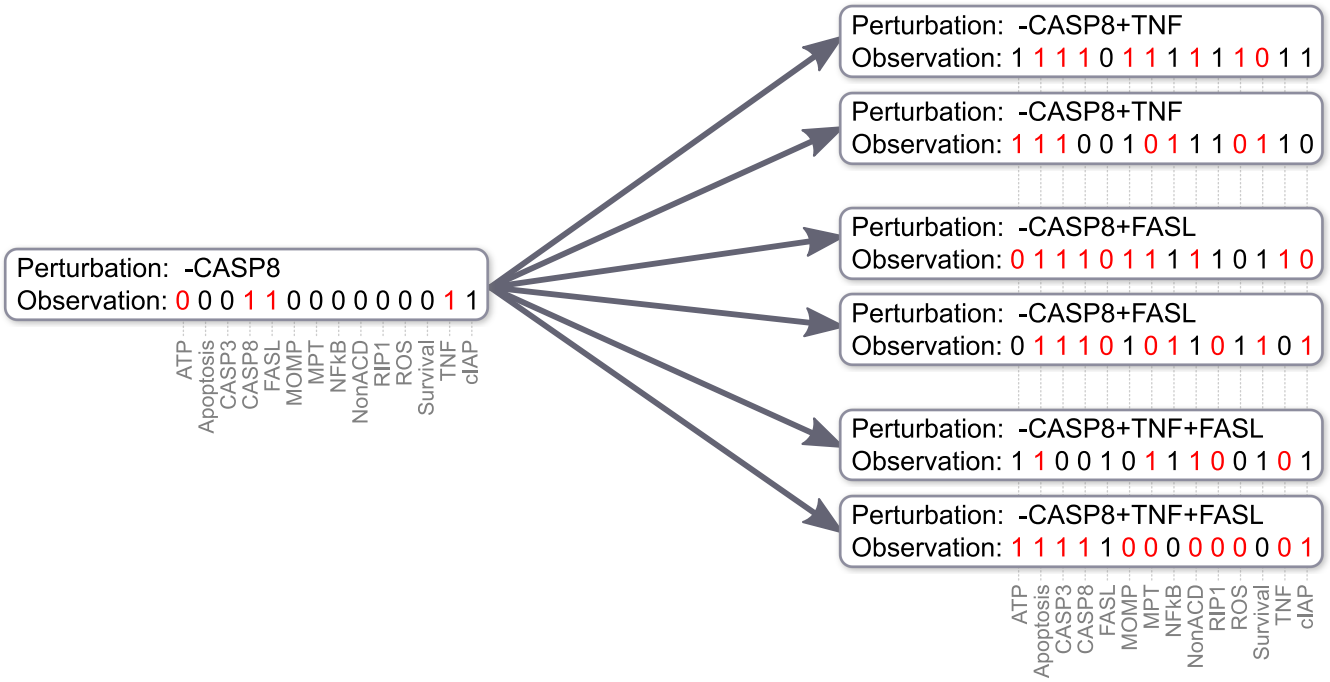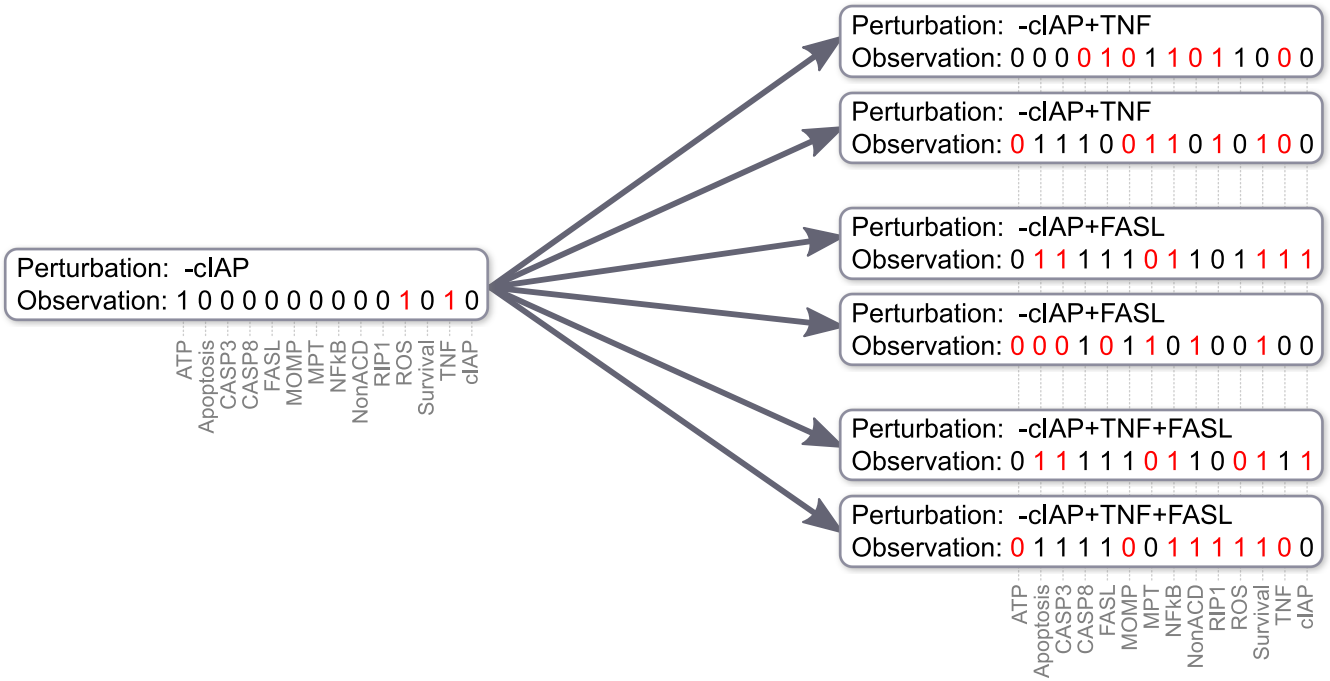

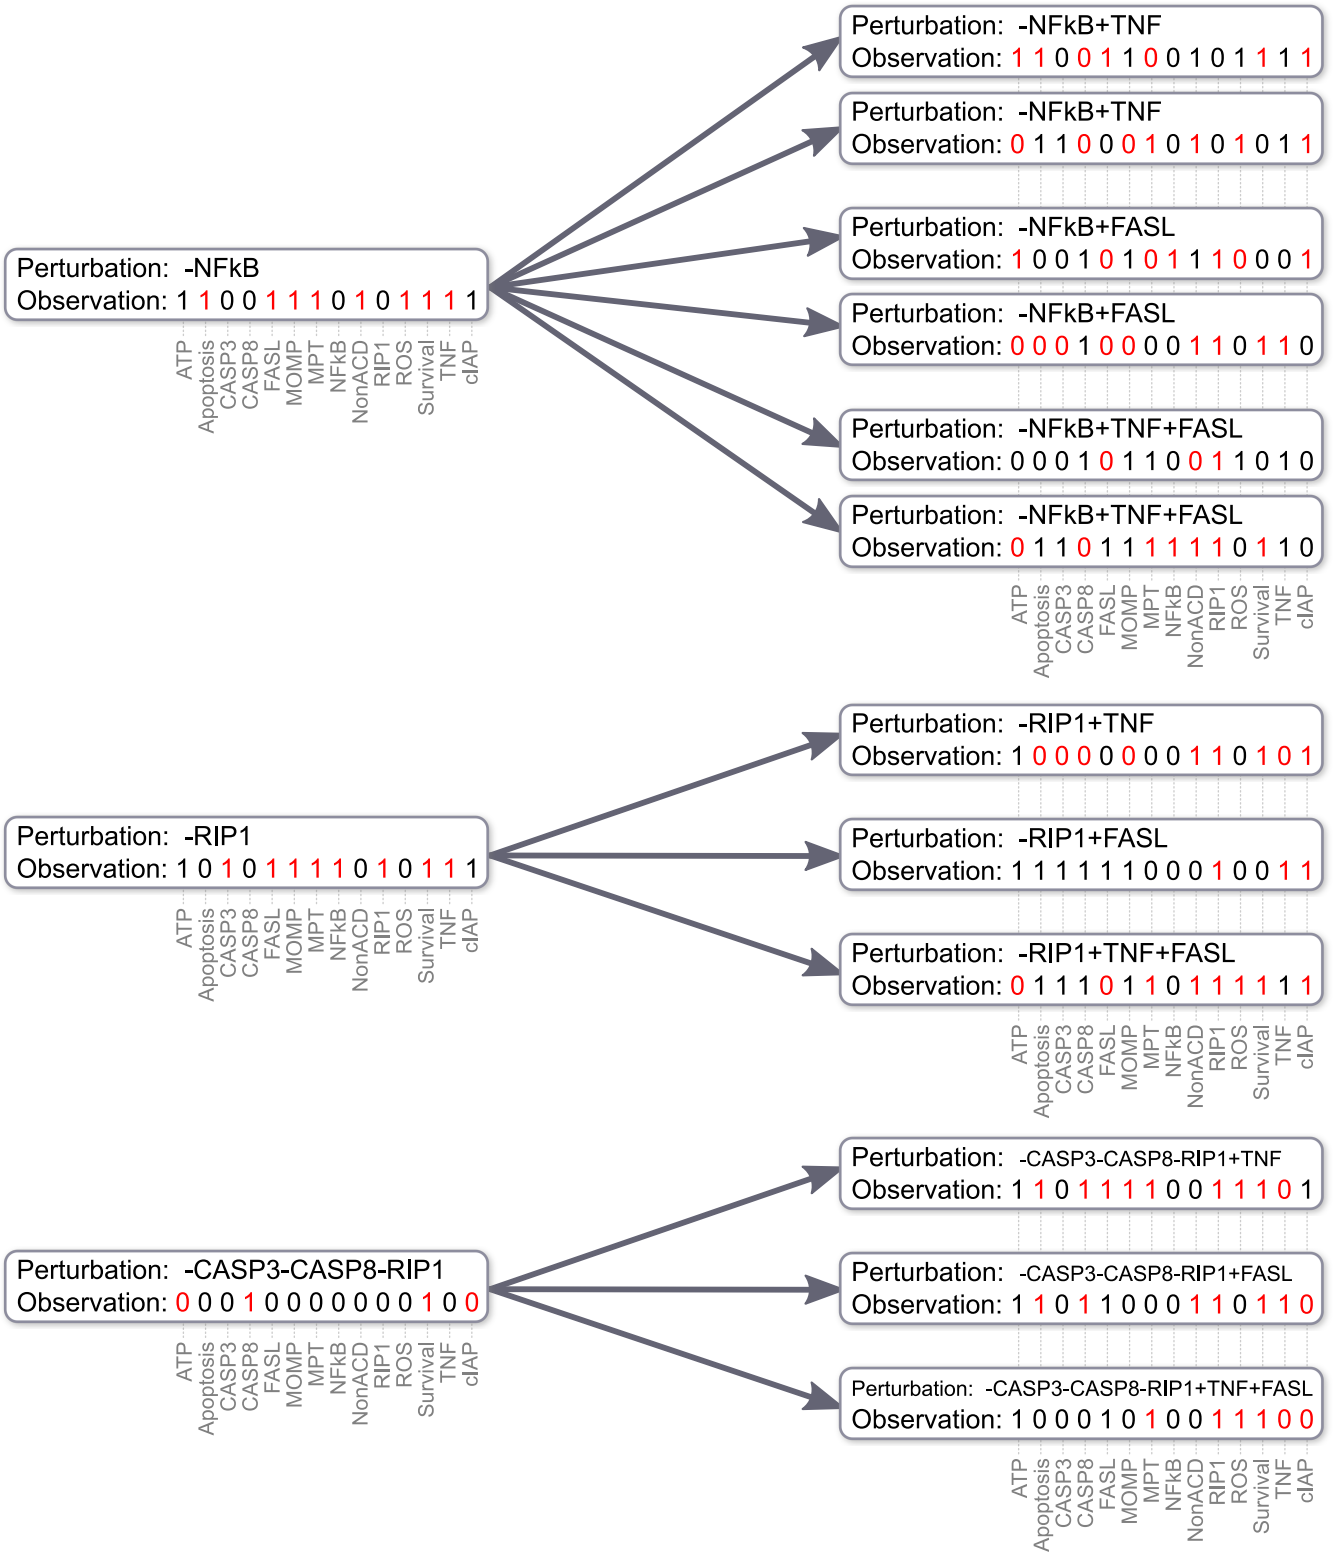

Supplement: 12859_2016_1287_MOESM2_ESM.pdf [file 12859_2016_1287_MOESM2_ESM.pdf]
