# Supplementary material for: Boolean regulatory network reconstruction using literature based knowledge with a genetic algorithm optimization method
Source: Springer Nature journal article supplement (doi:10.1186/s12859-016-1287-z), 2016-10-06
Supplement: 12859_2016_1287_MOESM4_ESM.pdf [file 12859_2016_1287_MOESM4_ESM.pdf]

# Cell-fate decision model: in-silico PKN 1

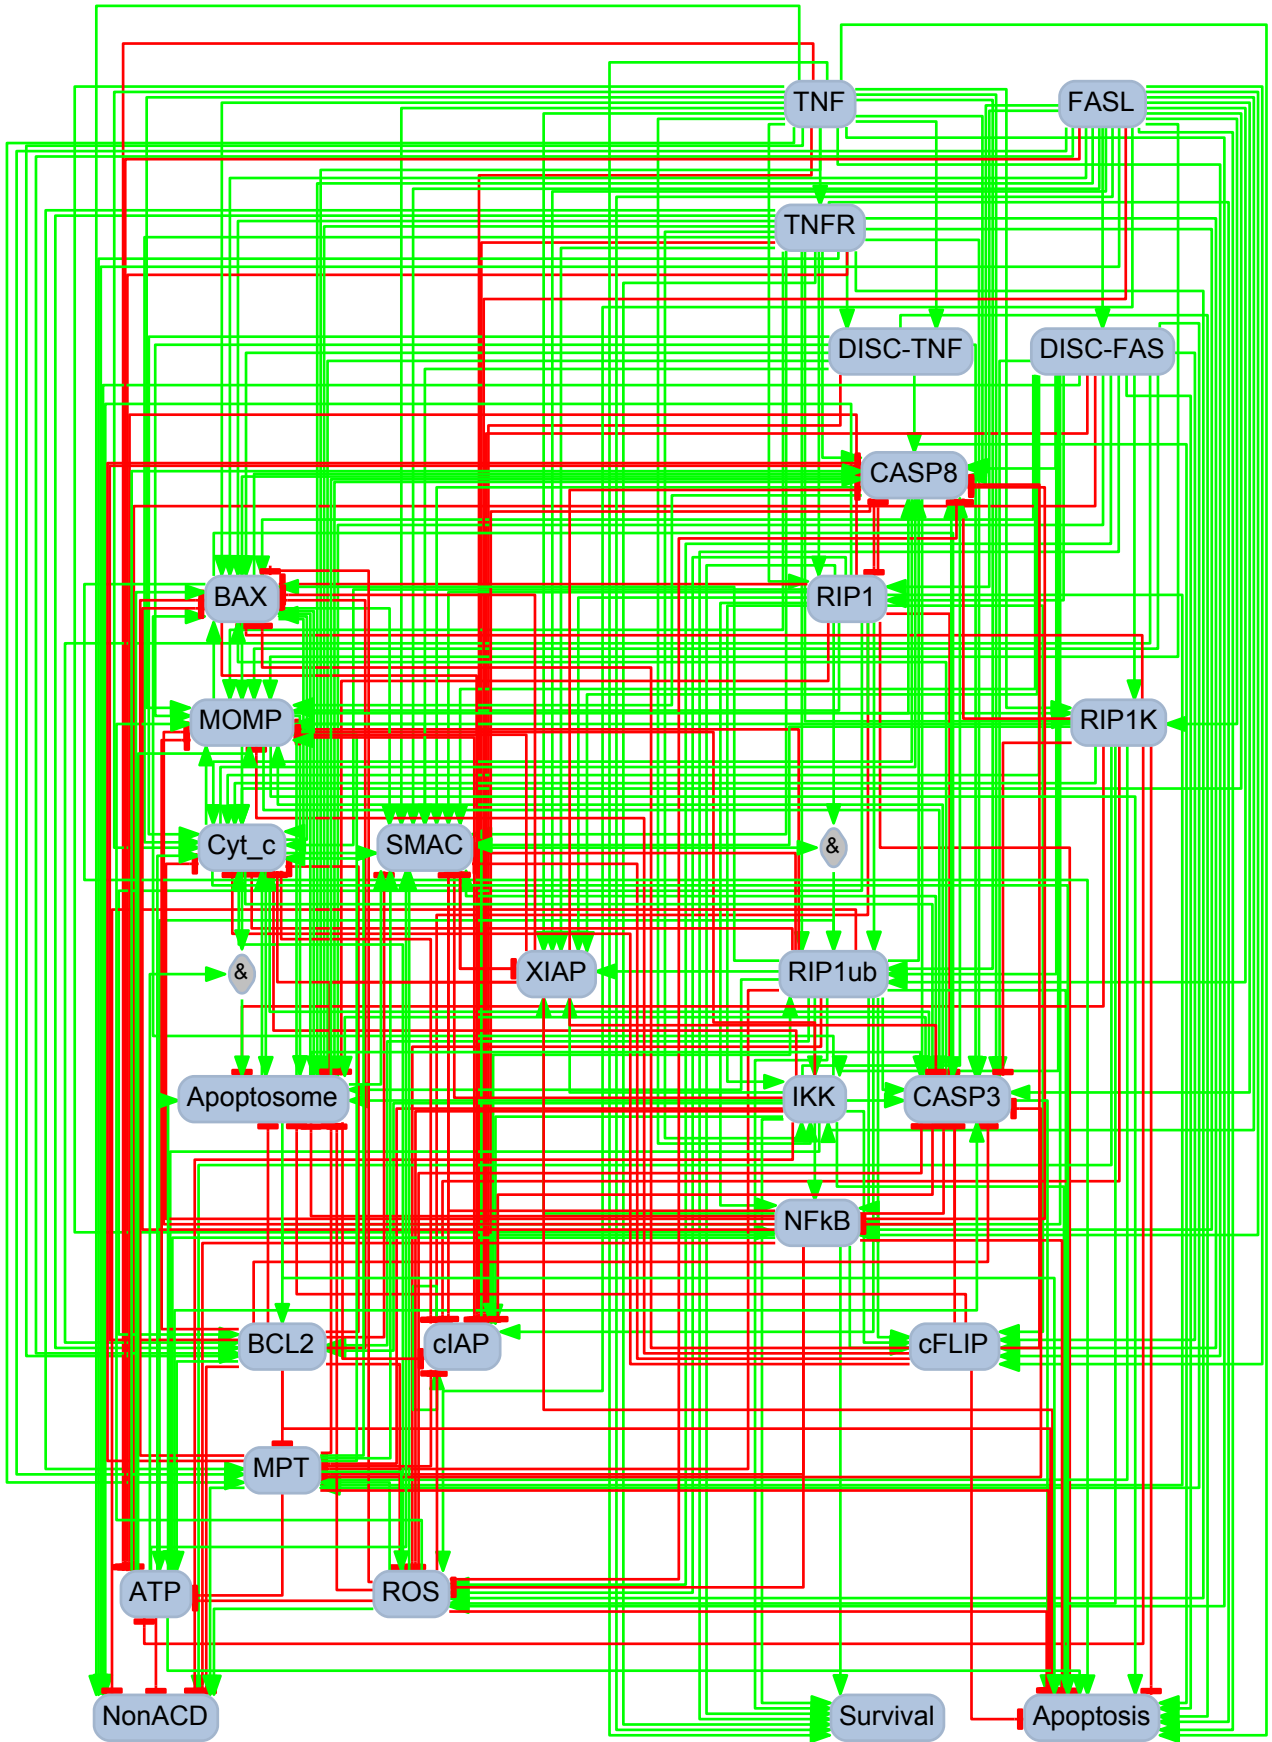

|            |   |            |
|------------|---|------------|
| BCL2       | → | ATP        |
| DISC-FAS   | ⊥ | ATP        |
| FASL       | ⊥ | ATP        |
| IKK        | → | ATP        |
| MPT        | ⊥ | ATP        |
| NFκB       | → | ATP        |
| RIP1       | ⊥ | ATP        |
| RIP1K      | ⊥ | ATP        |
| RIP1ub     | → | ATP        |
| ROS        | ⊥ | ATP        |
| TNF        | ⊥ | ATP        |
| TNFR       | ⊥ | ATP        |
| ATP        | → | Apoptosis  |
| Apoptosome | → | Apoptosis  |
| BAX        | → | Apoptosis  |
| BCL2       | ⊥ | Apoptosis  |
| CASP3      | → | Apoptosis  |
| CASP8      | → | Apoptosis  |
| Cyt_c      | → | Apoptosis  |
| DISC-FAS   | → | Apoptosis  |
| DISC-TNF   | → | Apoptosis  |
| FASL       | → | Apoptosis  |
| IKK        | → | Apoptosis  |
| MOMP       | → | Apoptosis  |
| MPT        | ⊥ | Apoptosis  |
| NFκB       | ⊥ | Apoptosis  |
| RIP1       | ⊥ | Apoptosis  |
| RIP1K      | ⊥ | Apoptosis  |
| RIP1ub     | → | Apoptosis  |
| ROS        | ⊥ | Apoptosis  |
| TNF        | → | Apoptosis  |
| TNFR       | → | Apoptosis  |
| XIAP       | ⊥ | Apoptosis  |
| cFLIP      | ⊥ | Apoptosis  |
| ATP        | → | Apoptosome |
| BAX        | → | Apoptosome |
| BCL2       | ⊥ | Apoptosome |
| CASP3      | → | Apoptosome |
| CASP8      | → | Apoptosome |
| Cyt_c      | → | Apoptosome |
| Cyt_c&ATP  | → | Apoptosome |
| DISC-FAS   | → | Apoptosome |
| DISC-TNF   | → | Apoptosome |
| FASL       | → | Apoptosome |
| IKK        | → | Apoptosome |
| MOMP       | → | Apoptosome |
| MPT        | ⊥ | Apoptosome |
| NFκB       | ⊥ | Apoptosome |
| RIP1       | ⊥ | Apoptosome |
| RIP1K      | ⊥ | Apoptosome |
| RIP1ub     | → | Apoptosome |
| ROS        | ⊥ | Apoptosome |
| TNF        | → | Apoptosome |
| TNFR       | → | Apoptosome |
| XIAP       | ⊥ | Apoptosome |
| cFLIP      | ⊥ | Apoptosome |
| ATP        | → | BAX        |
| Apoptosome | → | BAX        |
| BCL2       | ⊥ | BAX        |
| CASP3      | → | BAX        |
| CASP8      | → | BAX        |
| Cyt_c      | → | BAX        |
| DISC-FAS   | → | BAX        |
| DISC-TNF   | → | BAX        |
| FASL       | → | BAX        |
| IKK        | → | BAX        |

|            |   |       |
|------------|---|-------|
| MOMP       | → | BAX   |
| MPT        | ⊥ | BAX   |
| NFκB       | ⊥ | BAX   |
| RIP1       | ⊥ | BAX   |
| RIP1K      | ⊥ | BAX   |
| RIP1ub     | → | BAX   |
| ROS        | ⊥ | BAX   |
| TNF        | → | BAX   |
| TNFR       | → | BAX   |
| XIAP       | ⊥ | BAX   |
| cFLIP      | ⊥ | BAX   |
| DISC-FAS   | → | BCL2  |
| FASL       | → | BCL2  |
| IKK        | → | BCL2  |
| NFκB       | → | BCL2  |
| RIP1       | → | BCL2  |
| RIP1ub     | → | BCL2  |
| TNF        | → | BCL2  |
| TNFR       | → | BCL2  |
| ATP        | → | CASP3 |
| Apoptosome | → | CASP3 |
| BAX        | → | CASP3 |
| BCL2       | ⊥ | CASP3 |
| CASP8      | → | CASP3 |
| Cyt_c      | → | CASP3 |
| DISC-FAS   | → | CASP3 |
| DISC-TNF   | → | CASP3 |
| FASL       | → | CASP3 |
| IKK        | → | CASP3 |
| MOMP       | → | CASP3 |
| MPT        | ⊥ | CASP3 |
| NFκB       | ⊥ | CASP3 |
| RIP1       | ⊥ | CASP3 |
| RIP1K      | ⊥ | CASP3 |
| RIP1ub     | → | CASP3 |
| ROS        | ⊥ | CASP3 |
| TNF        | → | CASP3 |
| TNFR       | → | CASP3 |
| XIAP       | ⊥ | CASP3 |
| cFLIP      | ⊥ | CASP3 |
| ATP        | → | CASP8 |
| Apoptosome | → | CASP8 |
| BAX        | → | CASP8 |
| BCL2       | ⊥ | CASP8 |
| CASP3      | → | CASP8 |
| Cyt_c      | → | CASP8 |
| DISC-FAS   | → | CASP8 |
| DISC-TNF   | → | CASP8 |
| FASL       | → | CASP8 |
| IKK        | → | CASP8 |
| MOMP       | → | CASP8 |
| MPT        | ⊥ | CASP8 |
| NFκB       | ⊥ | CASP8 |
| RIP1       | ⊥ | CASP8 |
| RIP1K      | ⊥ | CASP8 |
| RIP1ub     | → | CASP8 |
| ROS        | ⊥ | CASP8 |
| TNF        | → | CASP8 |
| TNFR       | → | CASP8 |
| XIAP       | ⊥ | CASP8 |
| cFLIP      | ⊥ | CASP8 |
| ATP        | → | Cyt_c |
| Apoptosome | → | Cyt_c |
| BAX        | → | Cyt_c |
| BCL2       | ⊥ | Cyt_c |
| CASP3      | → | Cyt_c |

|            |   |          |
|------------|---|----------|
| CASP8      | → | Cyt_c    |
| DISC-FAS   | → | Cyt_c    |
| DISC-TNF   | → | Cyt_c    |
| FASL       | → | Cyt_c    |
| IKK        | ⊥ | Cyt_c    |
| MOMP       | → | Cyt_c    |
| MPT        | → | Cyt_c    |
| NFkB       | ⊥ | Cyt_c    |
| RIP1       | → | Cyt_c    |
| RIP1K      | → | Cyt_c    |
| RIP1ub     | ⊥ | Cyt_c    |
| ROS        | → | Cyt_c    |
| TNF        | → | Cyt_c    |
| TNFR       | → | Cyt_c    |
| XIAP       | ⊥ | Cyt_c    |
| cFLIP      | ⊥ | Cyt_c    |
| FASL       | → | DISC-FAS |
| TNF        | → | DISC-TNF |
| TNFR       | → | DISC-TNF |
| DISC-FAS   | → | IKK      |
| FASL       | → | IKK      |
| RIP1       | → | IKK      |
| RIP1ub     | → | IKK      |
| TNF        | → | IKK      |
| TNFR       | → | IKK      |
| ATP        | → | MOMP     |
| Apoptosome | → | MOMP     |
| BAX        | → | MOMP     |
| BCL2       | ⊥ | MOMP     |
| CASP3      | → | MOMP     |
| CASP8      | → | MOMP     |
| Cyt_c      | → | MOMP     |
| DISC-FAS   | → | MOMP     |
| DISC-TNF   | → | MOMP     |
| FASL       | → | MOMP     |
| IKK        | ⊥ | MOMP     |
| MPT        | → | MOMP     |
| NFkB       | ⊥ | MOMP     |
| RIP1       | → | MOMP     |
| RIP1K      | → | MOMP     |
| RIP1ub     | ⊥ | MOMP     |
| ROS        | → | MOMP     |
| TNF        | → | MOMP     |
| TNFR       | → | MOMP     |
| XIAP       | ⊥ | MOMP     |
| cFLIP      | ⊥ | MOMP     |
| BCL2       | ⊥ | MPT      |
| DISC-FAS   | → | MPT      |
| FASL       | → | MPT      |
| IKK        | ⊥ | MPT      |
| NFkB       | ⊥ | MPT      |
| RIP1       | → | MPT      |
| RIP1K      | → | MPT      |
| RIP1ub     | ⊥ | MPT      |
| ROS        | → | MPT      |
| TNF        | → | MPT      |
| TNFR       | → | MPT      |
| CASP3      | ⊥ | NFkB     |
| DISC-FAS   | → | NFkB     |
| FASL       | → | NFkB     |
| IKK        | → | NFkB     |
| RIP1       | → | NFkB     |
| RIP1ub     | → | NFkB     |
| TNF        | → | NFkB     |
| TNFR       | → | NFkB     |
| ATP        | ⊥ | NonACD   |

|            |   |          |
|------------|---|----------|
| BCL2       | ⊥ | NonACD   |
| DISC-FAS   | → | NonACD   |
| FASL       | → | NonACD   |
| IKK        | ⊥ | NonACD   |
| MPT        | → | NonACD   |
| NFkB       | ⊥ | NonACD   |
| RIP1       | → | NonACD   |
| RIP1K      | → | NonACD   |
| RIP1ub     | ⊥ | NonACD   |
| ROS        | → | NonACD   |
| TNF        | → | NonACD   |
| TNFR       | → | NonACD   |
| CASP8      | ⊥ | RIP1     |
| DISC-FAS   | → | RIP1     |
| FASL       | → | RIP1     |
| TNF        | → | RIP1     |
| TNFR       | → | RIP1     |
| DISC-FAS   | → | RIP1K    |
| FASL       | → | RIP1K    |
| RIP1       | → | RIP1K    |
| TNF        | → | RIP1K    |
| TNFR       | → | RIP1K    |
| DISC-FAS   | → | RIP1ub   |
| FASL       | → | RIP1ub   |
| RIP1       | → | RIP1ub   |
| TNF        | → | RIP1ub   |
| TNFR       | → | RIP1ub   |
| cIAP       | → | RIP1ub   |
| cIAP&RIP1  | → | RIP1ub   |
| BCL2       | ⊥ | ROS      |
| DISC-FAS   | → | ROS      |
| FASL       | → | ROS      |
| IKK        | ⊥ | ROS      |
| MPT        | → | ROS      |
| NFkB       | ⊥ | ROS      |
| RIP1       | → | ROS      |
| RIP1K      | → | ROS      |
| RIP1ub     | ⊥ | ROS      |
| TNF        | → | ROS      |
| TNFR       | → | ROS      |
| ATP        | → | SMAC     |
| Apoptosome | → | SMAC     |
| BAX        | → | SMAC     |
| BCL2       | ⊥ | SMAC     |
| CASP3      | → | SMAC     |
| CASP8      | → | SMAC     |
| Cyt_c      | → | SMAC     |
| DISC-FAS   | → | SMAC     |
| DISC-TNF   | → | SMAC     |
| FASL       | → | SMAC     |
| IKK        | ⊥ | SMAC     |
| MOMP       | → | SMAC     |
| MPT        | → | SMAC     |
| NFkB       | ⊥ | SMAC     |
| RIP1       | → | SMAC     |
| RIP1K      | → | SMAC     |
| RIP1ub     | ⊥ | SMAC     |
| ROS        | → | SMAC     |
| TNF        | → | SMAC     |
| TNFR       | → | SMAC     |
| XIAP       | ⊥ | SMAC     |
| cFLIP      | ⊥ | SMAC     |
| DISC-FAS   | → | Survival |
| FASL       | → | Survival |
| IKK        | → | Survival |
| NFkB       | → | Survival |

|            |   |          |
|------------|---|----------|
| RIP1       | → | Survival |
| RIP1ub     | → | Survival |
| TNF        | → | Survival |
| TNFR       | → | Survival |
| TNF        | → | TNFR     |
| DISC-FAS   | → | XIAP     |
| FASL       | → | XIAP     |
| IKK        | → | XIAP     |
| NFkB       | → | XIAP     |
| RIP1       | → | XIAP     |
| RIP1ub     | → | XIAP     |
| SMAC       | ⊥ | XIAP     |
| TNF        | → | XIAP     |
| TNFR       | → | XIAP     |
| DISC-FAS   | → | cFLIP    |
| FASL       | → | cFLIP    |
| IKK        | → | cFLIP    |
| NFkB       | → | cFLIP    |
| RIP1       | → | cFLIP    |
| RIP1ub     | → | cFLIP    |
| TNF        | → | cFLIP    |
| TNFR       | → | cFLIP    |
| Apoptosome | ⊥ | cIAP     |
| BAX        | ⊥ | cIAP     |
| CASP3      | ⊥ | cIAP     |
| CASP8      | ⊥ | cIAP     |
| Cyt_c      | ⊥ | cIAP     |
| DISC-FAS   | ⊥ | cIAP     |
| DISC-TNF   | ⊥ | cIAP     |
| FASL       | ⊥ | cIAP     |
| IKK        | → | cIAP     |
| MOMP       | ⊥ | cIAP     |
| MPT        | ⊥ | cIAP     |
| NFkB       | → | cIAP     |
| RIP1       | ⊥ | cIAP     |
| RIP1K      | ⊥ | cIAP     |
| RIP1ub     | → | cIAP     |
| ROS        | ⊥ | cIAP     |
| SMAC       | ⊥ | cIAP     |
| TNF        | ⊥ | cIAP     |
| TNFR       | ⊥ | cIAP     |
| cIAP       | → | cIAP     |

# Cell-fate decision model: in-silico PKN 2 (10% noise)

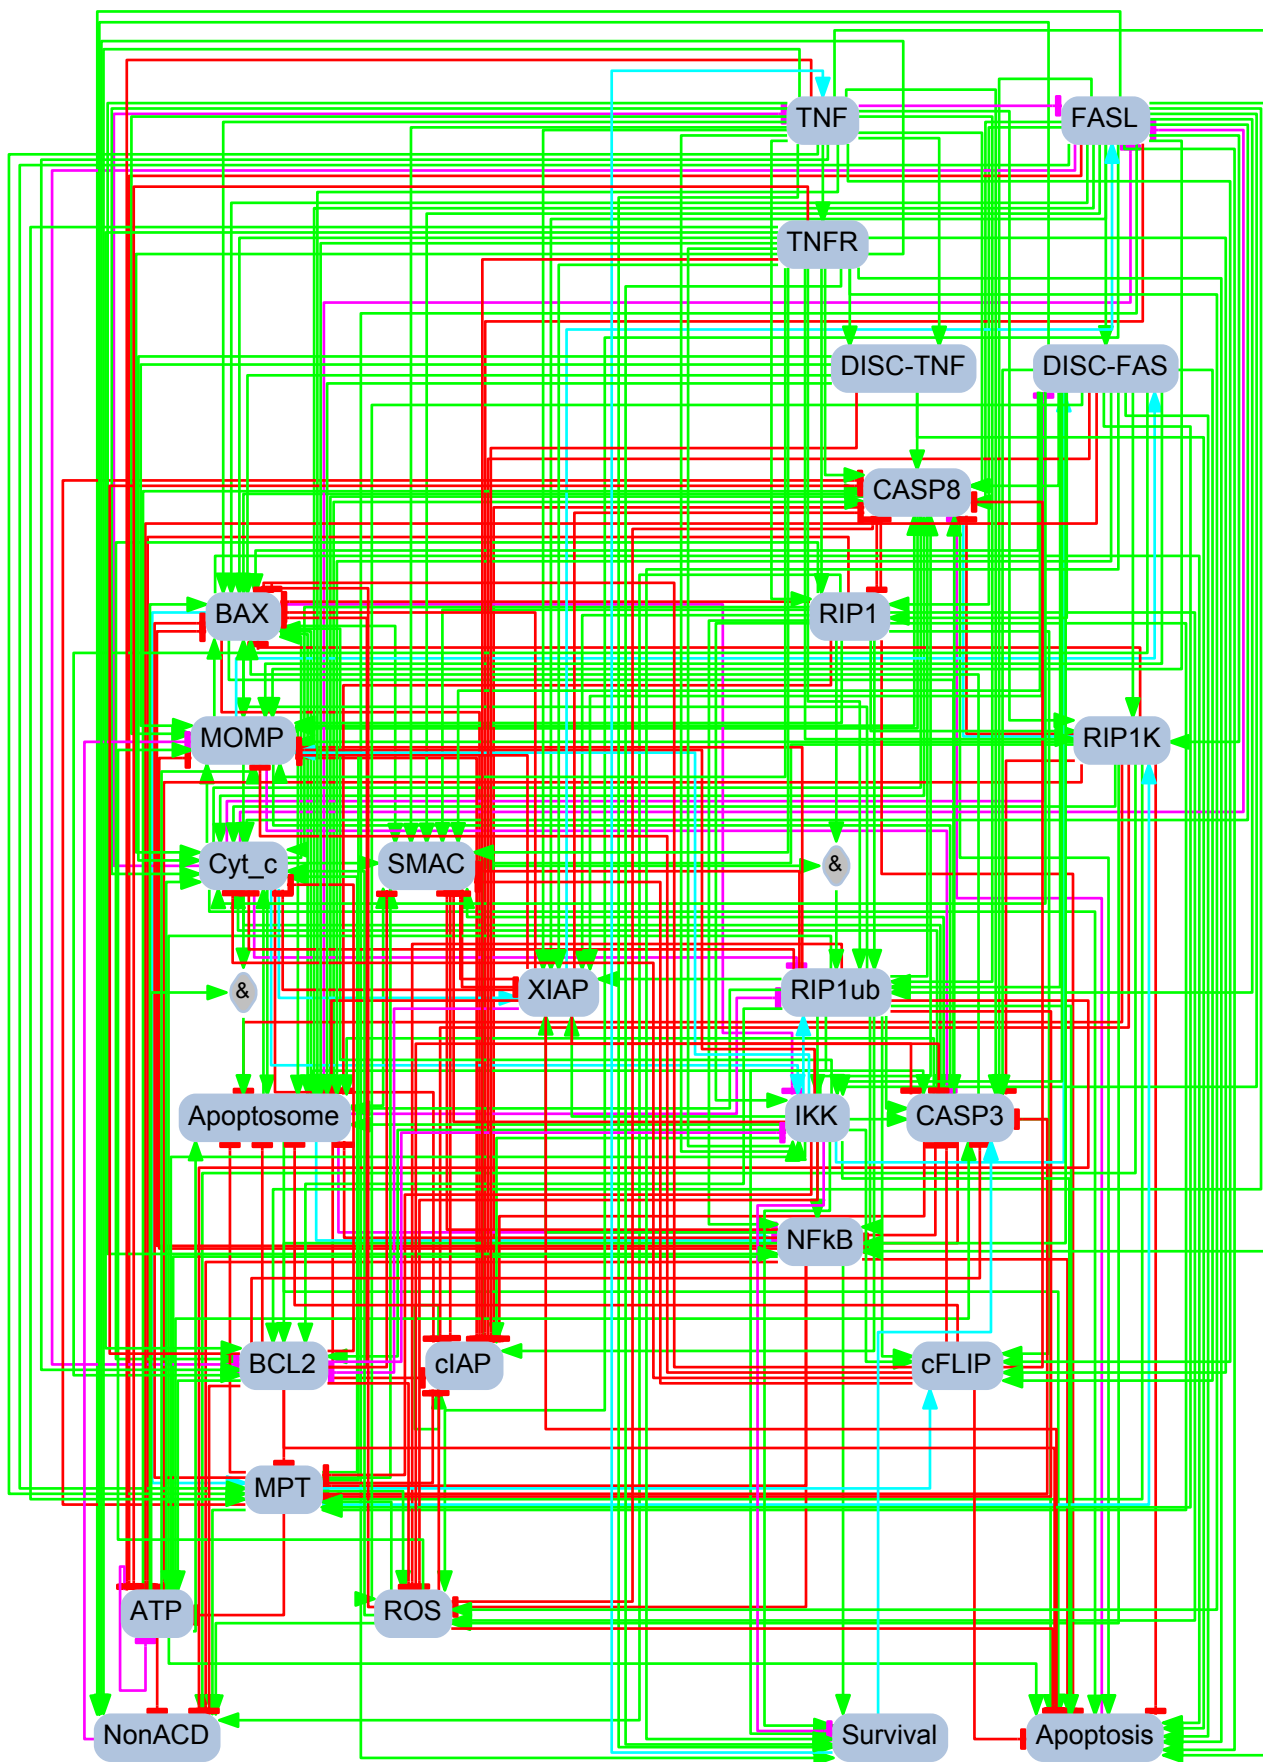

|            |   |            |
|------------|---|------------|
| BCL2       | → | ATP        |
| DISC-FAS   | ⊥ | ATP        |
| FASL       | ⊥ | ATP        |
| IKK        | → | ATP        |
| MPT        | ⊥ | ATP        |
| NFκB       | → | ATP        |
| RIP1       | ⊥ | ATP        |
| RIP1K      | ⊥ | ATP        |
| RIP1ub     | → | ATP        |
| TNF        | ⊥ | ATP        |
| TNFR       | ⊥ | ATP        |
| ATP        | ⊥ | ATP        |
| ATP        | → | Apoptosis  |
| Apoptosome | → | Apoptosis  |
| BAX        | → | Apoptosis  |
| BCL2       | ⊥ | Apoptosis  |
| CASP3      | → | Apoptosis  |
| CASP8      | → | Apoptosis  |
| Cyt_c      | → | Apoptosis  |
| DISC-FAS   | → | Apoptosis  |
| DISC-TNF   | → | Apoptosis  |
| FASL       | → | Apoptosis  |
| IKK        | → | Apoptosis  |
| NFκB       | ⊥ | Apoptosis  |
| RIP1       | ⊥ | Apoptosis  |
| RIP1K      | ⊥ | Apoptosis  |
| RIP1ub     | → | Apoptosis  |
| ROS        | ⊥ | Apoptosis  |
| TNF        | → | Apoptosis  |
| TNFR       | → | Apoptosis  |
| XIAP       | ⊥ | Apoptosis  |
| cFLIP      | ⊥ | Apoptosis  |
| ATP        | → | Apoptosome |
| BAX        | → | Apoptosome |
| BCL2       | ⊥ | Apoptosome |
| CASP3      | → | Apoptosome |
| CASP8      | → | Apoptosome |
| Cyt_c      | → | Apoptosome |
| Cyt_c&ATP  | → | Apoptosome |
| DISC-FAS   | → | Apoptosome |
| DISC-TNF   | → | Apoptosome |
| FASL       | → | Apoptosome |
| IKK        | → | Apoptosome |
| MOMP       | → | Apoptosome |
| MPT        | ⊥ | Apoptosome |
| NFκB       | ⊥ | Apoptosome |
| RIP1       | ⊥ | Apoptosome |
| RIP1K      | ⊥ | Apoptosome |
| RIP1ub     | → | Apoptosome |
| TNF        | → | Apoptosome |
| TNFR       | → | Apoptosome |
| XIAP       | ⊥ | Apoptosome |
| cFLIP      | ⊥ | Apoptosome |
| ATP        | → | BAX        |
| Apoptosome | → | BAX        |
| BCL2       | ⊥ | BAX        |
| CASP3      | → | BAX        |
| CASP8      | → | BAX        |
| Cyt_c      | → | BAX        |
| DISC-FAS   | → | BAX        |
| DISC-TNF   | → | BAX        |
| FASL       | → | BAX        |
| IKK        | → | BAX        |
| MOMP       | → | BAX        |
| MPT        | ⊥ | BAX        |
| NFκB       | ⊥ | BAX        |



|            |   |       |
|------------|---|-------|
| RIP1       | ⊥ | BAX   |
| RIP1K      | ⊥ | BAX   |
| RIP1ub     | → | BAX   |
| ROS        | ⊥ | BAX   |
| TNF        | → | BAX   |
| TNFR       | → | BAX   |
| XIAP       | ⊥ | BAX   |
| cFLIP      | ⊥ | BAX   |
| DISC-FAS   | → | BCL2  |
| FASL       | → | BCL2  |
| IKK        | → | BCL2  |
| NFκB       | → | BCL2  |
| RIP1       | → | BCL2  |
| RIP1ub     | → | BCL2  |
| TNF        | → | BCL2  |
| TNFR       | → | BCL2  |
| FASL       | ⊥ | BCL2  |
| XIAP       | ⊥ | BCL2  |
| ATP        | → | CASP3 |
| Apoptosome | → | CASP3 |
| BAX        | → | CASP3 |
| BCL2       | ⊥ | CASP3 |
| Cyt_c      | → | CASP3 |
| DISC-FAS   | → | CASP3 |
| FASL       | → | CASP3 |
| IKK        | → | CASP3 |
| MOMP       | → | CASP3 |
| MPT        | ⊥ | CASP3 |
| NFκB       | ⊥ | CASP3 |
| RIP1K      | ⊥ | CASP3 |
| RIP1ub     | → | CASP3 |
| ROS        | ⊥ | CASP3 |
| TNF        | → | CASP3 |
| XIAP       | ⊥ | CASP3 |
| cFLIP      | ⊥ | CASP3 |
| MOMP       | ⊥ | CASP3 |
| Survival   | → | CASP3 |
| ATP        | → | CASP8 |
| Apoptosome | → | CASP8 |
| BCL2       | ⊥ | CASP8 |
| CASP3      | → | CASP8 |
| Cyt_c      | → | CASP8 |
| DISC-FAS   | → | CASP8 |
| DISC-TNF   | → | CASP8 |
| FASL       | → | CASP8 |
| IKK        | → | CASP8 |
| MOMP       | → | CASP8 |
| MPT        | ⊥ | CASP8 |
| RIP1       | ⊥ | CASP8 |
| RIP1K      | ⊥ | CASP8 |
| RIP1ub     | → | CASP8 |
| ROS        | ⊥ | CASP8 |
| TNF        | → | CASP8 |
| TNFR       | → | CASP8 |
| XIAP       | ⊥ | CASP8 |
| cFLIP      | ⊥ | CASP8 |
| Apoptosis  | ⊥ | CASP8 |
| ATP        | → | Cyt_c |
| Apoptosome | → | Cyt_c |
| BCL2       | ⊥ | Cyt_c |
| CASP3      | → | Cyt_c |
| CASP8      | → | Cyt_c |
| DISC-FAS   | → | Cyt_c |
| DISC-TNF   | → | Cyt_c |
| FASL       | → | Cyt_c |
| MOMP       | → | Cyt_c |

|            |   |          |
|------------|---|----------|
| MPT        | → | Cyt_c    |
| RIP1       | → | Cyt_c    |
| RIP1K      | → | Cyt_c    |
| RIP1ub     | † | Cyt_c    |
| ROS        | → | Cyt_c    |
| TNF        | → | Cyt_c    |
| TNFR       | → | Cyt_c    |
| XIAP       | † | Cyt_c    |
| cFLIP      | † | Cyt_c    |
| FASL       | → | DISC-FAS |
| Cyt_c      | † | DISC-FAS |
| IKK        | → | DISC-FAS |
| MOMP       | → | DISC-FAS |
| TNF        | → | DISC-TNF |
| TNFR       | → | DISC-TNF |
| Apoptosome | † | FASL     |
| Cyt_c      | † | FASL     |
| TNF        | † | FASL     |
| XIAP       | → | FASL     |
| DISC-FAS   | → | IKK      |
| FASL       | → | IKK      |
| RIP1       | → | IKK      |
| RIP1ub     | → | IKK      |
| TNF        | → | IKK      |
| TNFR       | → | IKK      |
| BAX        | † | IKK      |
| BCL2       | † | IKK      |
| Cyt_c      | → | IKK      |
| ATP        | → | MOMP     |
| BAX        | → | MOMP     |
| CASP8      | → | MOMP     |
| Cyt_c      | → | MOMP     |
| DISC-FAS   | → | MOMP     |
| DISC-TNF   | → | MOMP     |
| FASL       | → | MOMP     |
| IKK        | † | MOMP     |
| MPT        | → | MOMP     |
| NFkB       | † | MOMP     |
| RIP1       | → | MOMP     |
| RIP1K      | → | MOMP     |
| RIP1ub     | † | MOMP     |
| ROS        | → | MOMP     |
| TNF        | → | MOMP     |
| TNFR       | → | MOMP     |
| XIAP       | † | MOMP     |
| cFLIP      | † | MOMP     |
| IKK        | → | MOMP     |
| NonACD     | † | MOMP     |
| BCL2       | † | MPT      |
| DISC-FAS   | → | MPT      |
| FASL       | → | MPT      |
| IKK        | † | MPT      |
| NFkB       | † | MPT      |
| RIP1       | → | MPT      |
| RIP1K      | → | MPT      |
| RIP1ub     | † | MPT      |
| ROS        | → | MPT      |
| TNF        | → | MPT      |
| TNFR       | → | MPT      |
| BAX        | → | MPT      |
| CASP3      | † | NFkB     |
| DISC-FAS   | → | NFkB     |
| FASL       | → | NFkB     |
| IKK        | → | NFkB     |
| RIP1       | → | NFkB     |
| RIP1ub     | → | NFkB     |

|            |   |          |
|------------|---|----------|
| TNF        | → | NFkB     |
| Apoptosome | → | NFkB     |
| Apoptosome | ⊥ | NFkB     |
| ATP        | ⊥ | NonACD   |
| BCL2       | ⊥ | NonACD   |
| DISC-FAS   | → | NonACD   |
| FASL       | → | NonACD   |
| MPT        | → | NonACD   |
| NFkB       | ⊥ | NonACD   |
| RIP1       | → | NonACD   |
| RIP1K      | → | NonACD   |
| RIP1ub     | ⊥ | NonACD   |
| ROS        | → | NonACD   |
| TNF        | → | NonACD   |
| TNFR       | → | NonACD   |
| CASP8      | ⊥ | RIP1     |
| DISC-FAS   | → | RIP1     |
| FASL       | → | RIP1     |
| TNF        | → | RIP1     |
| TNFR       | → | RIP1     |
| DISC-FAS   | → | RIP1K    |
| FASL       | → | RIP1K    |
| RIP1       | → | RIP1K    |
| TNF        | → | RIP1K    |
| TNFR       | → | RIP1K    |
| CASP8      | → | RIP1K    |
| MPT        | → | RIP1K    |
| DISC-FAS   | → | RIP1ub   |
| FASL       | → | RIP1ub   |
| RIP1       | → | RIP1ub   |
| TNF        | → | RIP1ub   |
| TNFR       | → | RIP1ub   |
| cIAP&RIP1  | → | RIP1ub   |
| Apoptosome | ⊥ | RIP1ub   |
| Cyt_c      | ⊥ | RIP1ub   |
| IKK        | → | RIP1ub   |
| BCL2       | ⊥ | ROS      |
| DISC-FAS   | → | ROS      |
| FASL       | → | ROS      |
| IKK        | ⊥ | ROS      |
| MPT        | → | ROS      |
| NFkB       | ⊥ | ROS      |
| RIP1       | → | ROS      |
| RIP1K      | → | ROS      |
| RIP1ub     | ⊥ | ROS      |
| TNFR       | → | ROS      |
| Apoptosome | → | SMAC     |
| BAX        | → | SMAC     |
| BCL2       | ⊥ | SMAC     |
| CASP3      | → | SMAC     |
| Cyt_c      | → | SMAC     |
| DISC-FAS   | → | SMAC     |
| FASL       | → | SMAC     |
| IKK        | ⊥ | SMAC     |
| MPT        | → | SMAC     |
| NFkB       | ⊥ | SMAC     |
| RIP1       | → | SMAC     |
| RIP1K      | → | SMAC     |
| RIP1ub     | ⊥ | SMAC     |
| TNF        | → | SMAC     |
| TNFR       | → | SMAC     |
| XIAP       | ⊥ | SMAC     |
| cFLIP      | ⊥ | SMAC     |
| DISC-FAS   | → | Survival |
| FASL       | → | Survival |
| IKK        | → | Survival |

|            |   |          |
|------------|---|----------|
| NFkB       | → | Survival |
| RIP1ub     | → | Survival |
| TNF        | → | Survival |
| TNFR       | → | Survival |
| IKK        | + | Survival |
| Cyt_c      | + | TNF      |
| Survival   | → | TNF      |
| TNF        | → | TNFR     |
| DISC-FAS   | → | XIAP     |
| FASL       | → | XIAP     |
| IKK        | → | XIAP     |
| NFkB       | → | XIAP     |
| RIP1       | → | XIAP     |
| RIP1ub     | → | XIAP     |
| SMAC       | + | XIAP     |
| TNF        | → | XIAP     |
| TNFR       | → | XIAP     |
| Cyt_c      | → | XIAP     |
| DISC-FAS   | → | cFLIP    |
| IKK        | → | cFLIP    |
| RIP1       | → | cFLIP    |
| RIP1ub     | → | cFLIP    |
| TNF        | → | cFLIP    |
| TNFR       | → | cFLIP    |
| MPT        | → | cFLIP    |
| Apoptosome | + | clAP     |
| BAX        | + | clAP     |
| CASP3      | + | clAP     |
| CASP8      | + | clAP     |
| Cyt_c      | + | clAP     |
| DISC-FAS   | + | clAP     |
| DISC-TNF   | + | clAP     |
| FASL       | + | clAP     |
| IKK        | → | clAP     |
| MOMP       | + | clAP     |
| MPT        | + | clAP     |
| RIP1K      | + | clAP     |
| RIP1ub     | → | clAP     |
| ROS        | + | clAP     |
| SMAC       | + | clAP     |
| TNFR       | + | clAP     |
| clAP       | → | clAP     |

# Cell-fate decision model: in-silico PKN 3 (20% noise)

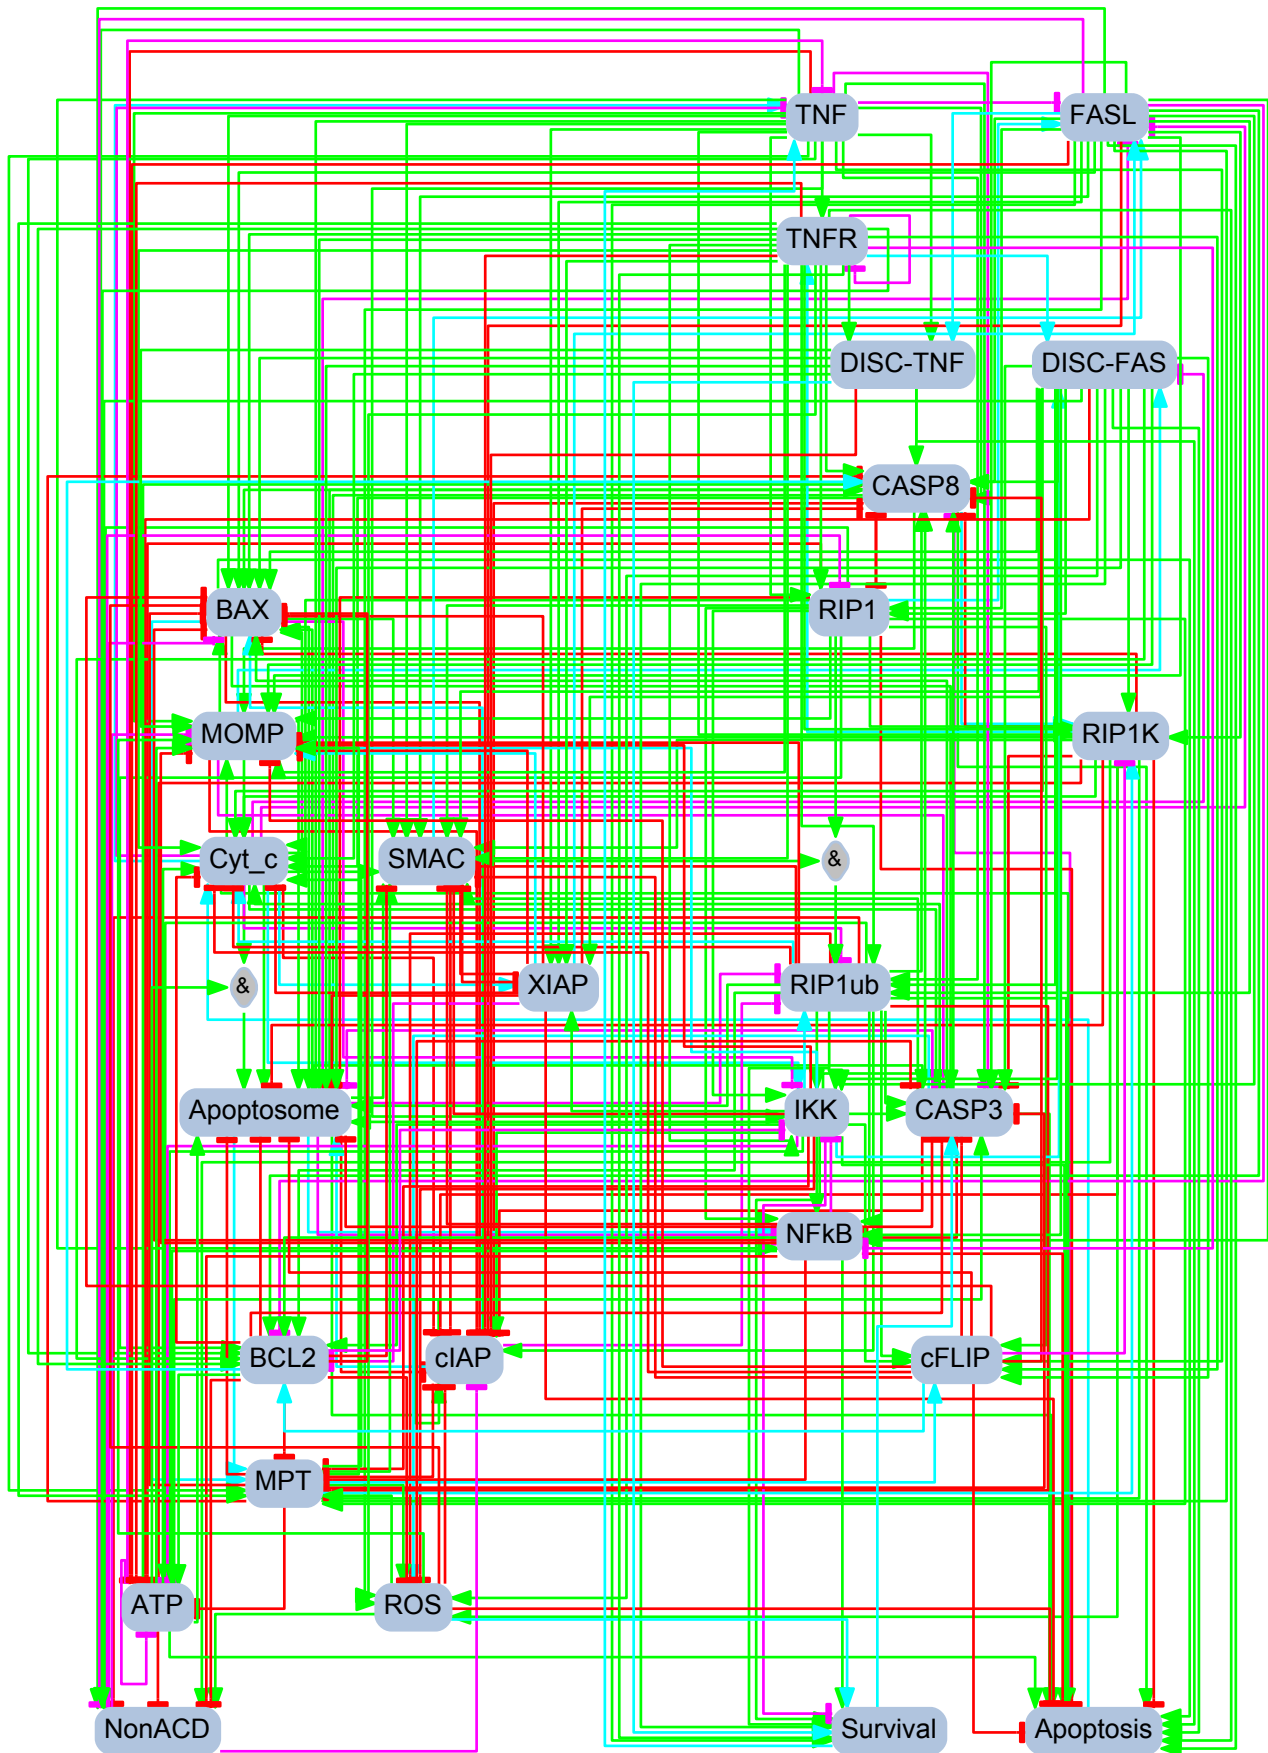

|            |   |            |
|------------|---|------------|
| BCL2       | → | ATP        |
| DISC-FAS   | ⊥ | ATP        |
| FASL       | ⊥ | ATP        |
| IKK        | → | ATP        |
| MPT        | ⊥ | ATP        |
| NFκB       | → | ATP        |
| RIP1       | ⊥ | ATP        |
| RIP1K      | ⊥ | ATP        |
| RIP1ub     | → | ATP        |
| TNF        | ⊥ | ATP        |
| TNFR       | ⊥ | ATP        |
| ATP        | ⊥ | ATP        |
| IKK        | ⊥ | ATP        |
| ATP        | → | Apoptosis  |
| Apoptosome | → | Apoptosis  |
| BAX        | → | Apoptosis  |
| CASP3      | → | Apoptosis  |
| CASP8      | → | Apoptosis  |
| Cyt_c      | → | Apoptosis  |
| DISC-FAS   | → | Apoptosis  |
| DISC-TNF   | → | Apoptosis  |
| FASL       | → | Apoptosis  |
| IKK        | → | Apoptosis  |
| NFκB       | ⊥ | Apoptosis  |
| RIP1       | ⊥ | Apoptosis  |
| RIP1K      | ⊥ | Apoptosis  |
| RIP1ub     | → | Apoptosis  |
| ROS        | ⊥ | Apoptosis  |
| TNFR       | → | Apoptosis  |
| XIAP       | ⊥ | Apoptosis  |
| cFLIP      | ⊥ | Apoptosis  |
| ATP        | → | Apoptosome |
| BAX        | → | Apoptosome |
| BCL2       | ⊥ | Apoptosome |
| CASP8      | → | Apoptosome |
| Cyt_c      | → | Apoptosome |
| Cyt_c&ATP  | → | Apoptosome |
| DISC-FAS   | → | Apoptosome |
| DISC-TNF   | → | Apoptosome |
| IKK        | → | Apoptosome |
| MOMP       | → | Apoptosome |
| MPT        | ⊥ | Apoptosome |
| NFκB       | ⊥ | Apoptosome |
| RIP1       | ⊥ | Apoptosome |
| RIP1K      | ⊥ | Apoptosome |
| RIP1ub     | → | Apoptosome |
| TNF        | → | Apoptosome |
| TNFR       | → | Apoptosome |
| XIAP       | ⊥ | Apoptosome |
| cFLIP      | ⊥ | Apoptosome |
| CASP3      | ⊥ | Apoptosome |
| cIAP       | → | Apoptosome |
| Apoptosome | → | BAX        |
| BCL2       | ⊥ | BAX        |
| CASP3      | → | BAX        |
| CASP8      | → | BAX        |
| Cyt_c      | → | BAX        |
| DISC-FAS   | → | BAX        |
| DISC-TNF   | → | BAX        |
| FASL       | → | BAX        |
| MOMP       | → | BAX        |
| MPT        | ⊥ | BAX        |
| NFκB       | ⊥ | BAX        |
| RIP1K      | ⊥ | BAX        |
| ROS        | ⊥ | BAX        |
| TNF        | → | BAX        |

|            |   |       |
|------------|---|-------|
| TNFR       | → | BAX   |
| XIAP       | ⊥ | BAX   |
| cFLIP      | ⊥ | BAX   |
| NonACD     | ⊥ | BAX   |
| cIAP       | → | BAX   |
| DISC-FAS   | → | BCL2  |
| FASL       | → | BCL2  |
| IKK        | → | BCL2  |
| NFκB       | → | BCL2  |
| RIP1       | → | BCL2  |
| RIP1ub     | → | BCL2  |
| TNF        | → | BCL2  |
| TNFR       | → | BCL2  |
| FASL       | ⊥ | BCL2  |
| XIAP       | ⊥ | BCL2  |
| cFLIP      | → | BCL2  |
| ATP        | → | CASP3 |
| Apoptosome | → | CASP3 |
| BAX        | → | CASP3 |
| BCL2       | ⊥ | CASP3 |
| Cyt_c      | → | CASP3 |
| DISC-FAS   | → | CASP3 |
| FASL       | → | CASP3 |
| IKK        | → | CASP3 |
| MPT        | ⊥ | CASP3 |
| NFκB       | ⊥ | CASP3 |
| RIP1K      | ⊥ | CASP3 |
| RIP1ub     | → | CASP3 |
| ROS        | ⊥ | CASP3 |
| TNF        | → | CASP3 |
| cFLIP      | ⊥ | CASP3 |
| MOMP       | ⊥ | CASP3 |
| Survival   | → | CASP3 |
| TNF        | ⊥ | CASP3 |
| ATP        | → | CASP8 |
| Apoptosome | → | CASP8 |
| CASP3      | → | CASP8 |
| DISC-FAS   | → | CASP8 |
| DISC-TNF   | → | CASP8 |
| FASL       | → | CASP8 |
| IKK        | → | CASP8 |
| MPT        | ⊥ | CASP8 |
| RIP1       | ⊥ | CASP8 |
| RIP1K      | ⊥ | CASP8 |
| RIP1ub     | → | CASP8 |
| TNF        | → | CASP8 |
| TNFR       | → | CASP8 |
| XIAP       | ⊥ | CASP8 |
| cFLIP      | ⊥ | CASP8 |
| Apoptosis  | ⊥ | CASP8 |
| BCL2       | → | CASP8 |
| ATP        | → | Cyt_c |
| BCL2       | ⊥ | Cyt_c |
| CASP3      | → | Cyt_c |
| CASP8      | → | Cyt_c |
| DISC-FAS   | → | Cyt_c |
| DISC-TNF   | → | Cyt_c |
| MOMP       | → | Cyt_c |
| MPT        | → | Cyt_c |
| RIP1       | → | Cyt_c |
| RIP1K      | → | Cyt_c |
| RIP1ub     | ⊥ | Cyt_c |
| TNFR       | → | Cyt_c |
| XIAP       | ⊥ | Cyt_c |
| cFLIP      | ⊥ | Cyt_c |
| Apoptosis  | → | Cyt_c |

|            |   |          |
|------------|---|----------|
| RIP1ub     | → | Cyt_c    |
| Cyt_c      | ⊥ | DISC-FAS |
| IKK        | → | DISC-FAS |
| MOMP       | → | DISC-FAS |
| TNFR       | → | DISC-FAS |
| TNF        | → | DISC-TNF |
| TNFR       | → | DISC-TNF |
| FASL       | → | DISC-TNF |
| Apoptosome | ⊥ | FASL     |
| Cyt_c      | ⊥ | FASL     |
| RIP1       | → | FASL     |
| SMAC       | → | FASL     |
| TNF        | ⊥ | FASL     |
| XIAP       | → | FASL     |
| DISC-FAS   | → | IKK      |
| FASL       | → | IKK      |
| RIP1       | → | IKK      |
| RIP1ub     | → | IKK      |
| TNF        | → | IKK      |
| TNFR       | → | IKK      |
| BAX        | ⊥ | IKK      |
| BCL2       | ⊥ | IKK      |
| Cyt_c      | → | IKK      |
| NFkB       | ⊥ | IKK      |
| ATP        | → | MOMP     |
| CASP8      | → | MOMP     |
| Cyt_c      | → | MOMP     |
| DISC-FAS   | → | MOMP     |
| DISC-TNF   | → | MOMP     |
| FASL       | → | MOMP     |
| IKK        | ⊥ | MOMP     |
| MPT        | → | MOMP     |
| NFkB       | ⊥ | MOMP     |
| RIP1       | → | MOMP     |
| RIP1K      | → | MOMP     |
| RIP1ub     | ⊥ | MOMP     |
| ROS        | → | MOMP     |
| TNF        | → | MOMP     |
| TNFR       | → | MOMP     |
| XIAP       | ⊥ | MOMP     |
| cFLIP      | ⊥ | MOMP     |
| IKK        | → | MOMP     |
| NonACD     | ⊥ | MOMP     |
| XIAP       | → | MOMP     |
| BCL2       | ⊥ | MPT      |
| FASL       | → | MPT      |
| IKK        | ⊥ | MPT      |
| NFkB       | ⊥ | MPT      |
| RIP1       | → | MPT      |
| RIP1K      | → | MPT      |
| RIP1ub     | ⊥ | MPT      |
| ROS        | → | MPT      |
| TNF        | → | MPT      |
| TNFR       | → | MPT      |
| Apoptosome | → | MPT      |
| BAX        | → | MPT      |
| CASP3      | ⊥ | NFkB     |
| DISC-FAS   | → | NFkB     |
| FASL       | → | NFkB     |
| IKK        | → | NFkB     |
| RIP1       | → | NFkB     |
| RIP1ub     | → | NFkB     |
| TNF        | → | NFkB     |
| Apoptosome | → | NFkB     |
| Apoptosome | ⊥ | NFkB     |
| TNFR       | ⊥ | NFkB     |



|            |   |          |
|------------|---|----------|
| ATP        | ⊥ | NonACD   |
| BCL2       | ⊥ | NonACD   |
| DISC-FAS   | → | NonACD   |
| FASL       | → | NonACD   |
| NFkB       | ⊥ | NonACD   |
| RIP1       | → | NonACD   |
| RIP1K      | → | NonACD   |
| RIP1ub     | ⊥ | NonACD   |
| ROS        | → | NonACD   |
| TNF        | → | NonACD   |
| TNFR       | → | NonACD   |
| FASL       | ⊥ | NonACD   |
| CASP8      | ⊥ | RIP1     |
| DISC-FAS   | → | RIP1     |
| FASL       | → | RIP1     |
| TNF        | → | RIP1     |
| TNFR       | → | RIP1     |
| NonACD     | ⊥ | RIP1     |
| DISC-FAS   | → | RIP1K    |
| FASL       | → | RIP1K    |
| RIP1       | → | RIP1K    |
| TNF        | → | RIP1K    |
| TNFR       | → | RIP1K    |
| CASP8      | → | RIP1K    |
| MPT        | → | RIP1K    |
| cFLIP      | ⊥ | RIP1K    |
| DISC-FAS   | → | RIP1ub   |
| FASL       | → | RIP1ub   |
| TNF        | → | RIP1ub   |
| TNFR       | → | RIP1ub   |
| cIAP&RIP1  | → | RIP1ub   |
| Apoptosome | ⊥ | RIP1ub   |
| Cyt_c      | ⊥ | RIP1ub   |
| IKK        | → | RIP1ub   |
| cIAP       | ⊥ | RIP1ub   |
| BCL2       | ⊥ | ROS      |
| DISC-FAS   | → | ROS      |
| FASL       | → | ROS      |
| IKK        | ⊥ | ROS      |
| MPT        | → | ROS      |
| RIP1K      | → | ROS      |
| RIP1ub     | ⊥ | ROS      |
| TNFR       | → | ROS      |
| CASP3      | → | ROS      |
| Apoptosome | → | SMAC     |
| BAX        | → | SMAC     |
| BCL2       | ⊥ | SMAC     |
| CASP3      | → | SMAC     |
| Cyt_c      | → | SMAC     |
| DISC-FAS   | → | SMAC     |
| FASL       | → | SMAC     |
| IKK        | ⊥ | SMAC     |
| MPT        | → | SMAC     |
| NFkB       | ⊥ | SMAC     |
| RIP1       | → | SMAC     |
| RIP1K      | → | SMAC     |
| RIP1ub     | ⊥ | SMAC     |
| TNF        | → | SMAC     |
| TNFR       | → | SMAC     |
| XIAP       | ⊥ | SMAC     |
| cFLIP      | ⊥ | SMAC     |
| DISC-FAS   | → | Survival |
| FASL       | → | Survival |
| IKK        | → | Survival |
| NFkB       | → | Survival |
| RIP1ub     | → | Survival |

|            |   |          |
|------------|---|----------|
| TNFR       | → | Survival |
| DISC-TNF   | → | Survival |
| IKK        | + | Survival |
| ROS        | → | Survival |
| ATP        | + | TNF      |
| Cyt_c      | → | TNF      |
| Cyt_c      | + | TNF      |
| Survival   | → | TNF      |
| TNF        | → | TNFR     |
| RIP1K      | → | TNFR     |
| TNFR       | + | TNFR     |
| DISC-FAS   | → | XIAP     |
| FASL       | → | XIAP     |
| IKK        | → | XIAP     |
| SMAC       | + | XIAP     |
| TNF        | → | XIAP     |
| TNFR       | → | XIAP     |
| Cyt_c      | → | XIAP     |
| DISC-FAS   | → | cFLIP    |
| IKK        | → | cFLIP    |
| RIP1       | → | cFLIP    |
| RIP1ub     | → | cFLIP    |
| TNF        | → | cFLIP    |
| TNFR       | → | cFLIP    |
| MPT        | → | cFLIP    |
| Apoptosome | + | clAP     |
| BAX        | + | clAP     |
| CASP3      | + | clAP     |
| CASP8      | + | clAP     |
| Cyt_c      | + | clAP     |
| DISC-TNF   | + | clAP     |
| FASL       | + | clAP     |
| IKK        | → | clAP     |
| MOMP       | + | clAP     |
| MPT        | + | clAP     |
| RIP1K      | + | clAP     |
| RIP1ub     | → | clAP     |
| ROS        | + | clAP     |
| SMAC       | + | clAP     |
| TNFR       | + | clAP     |
| clAP       | → | clAP     |
| NonACD     | + | clAP     |

# Cell-fate decision model: in-silico PKN 4 (30% noise)

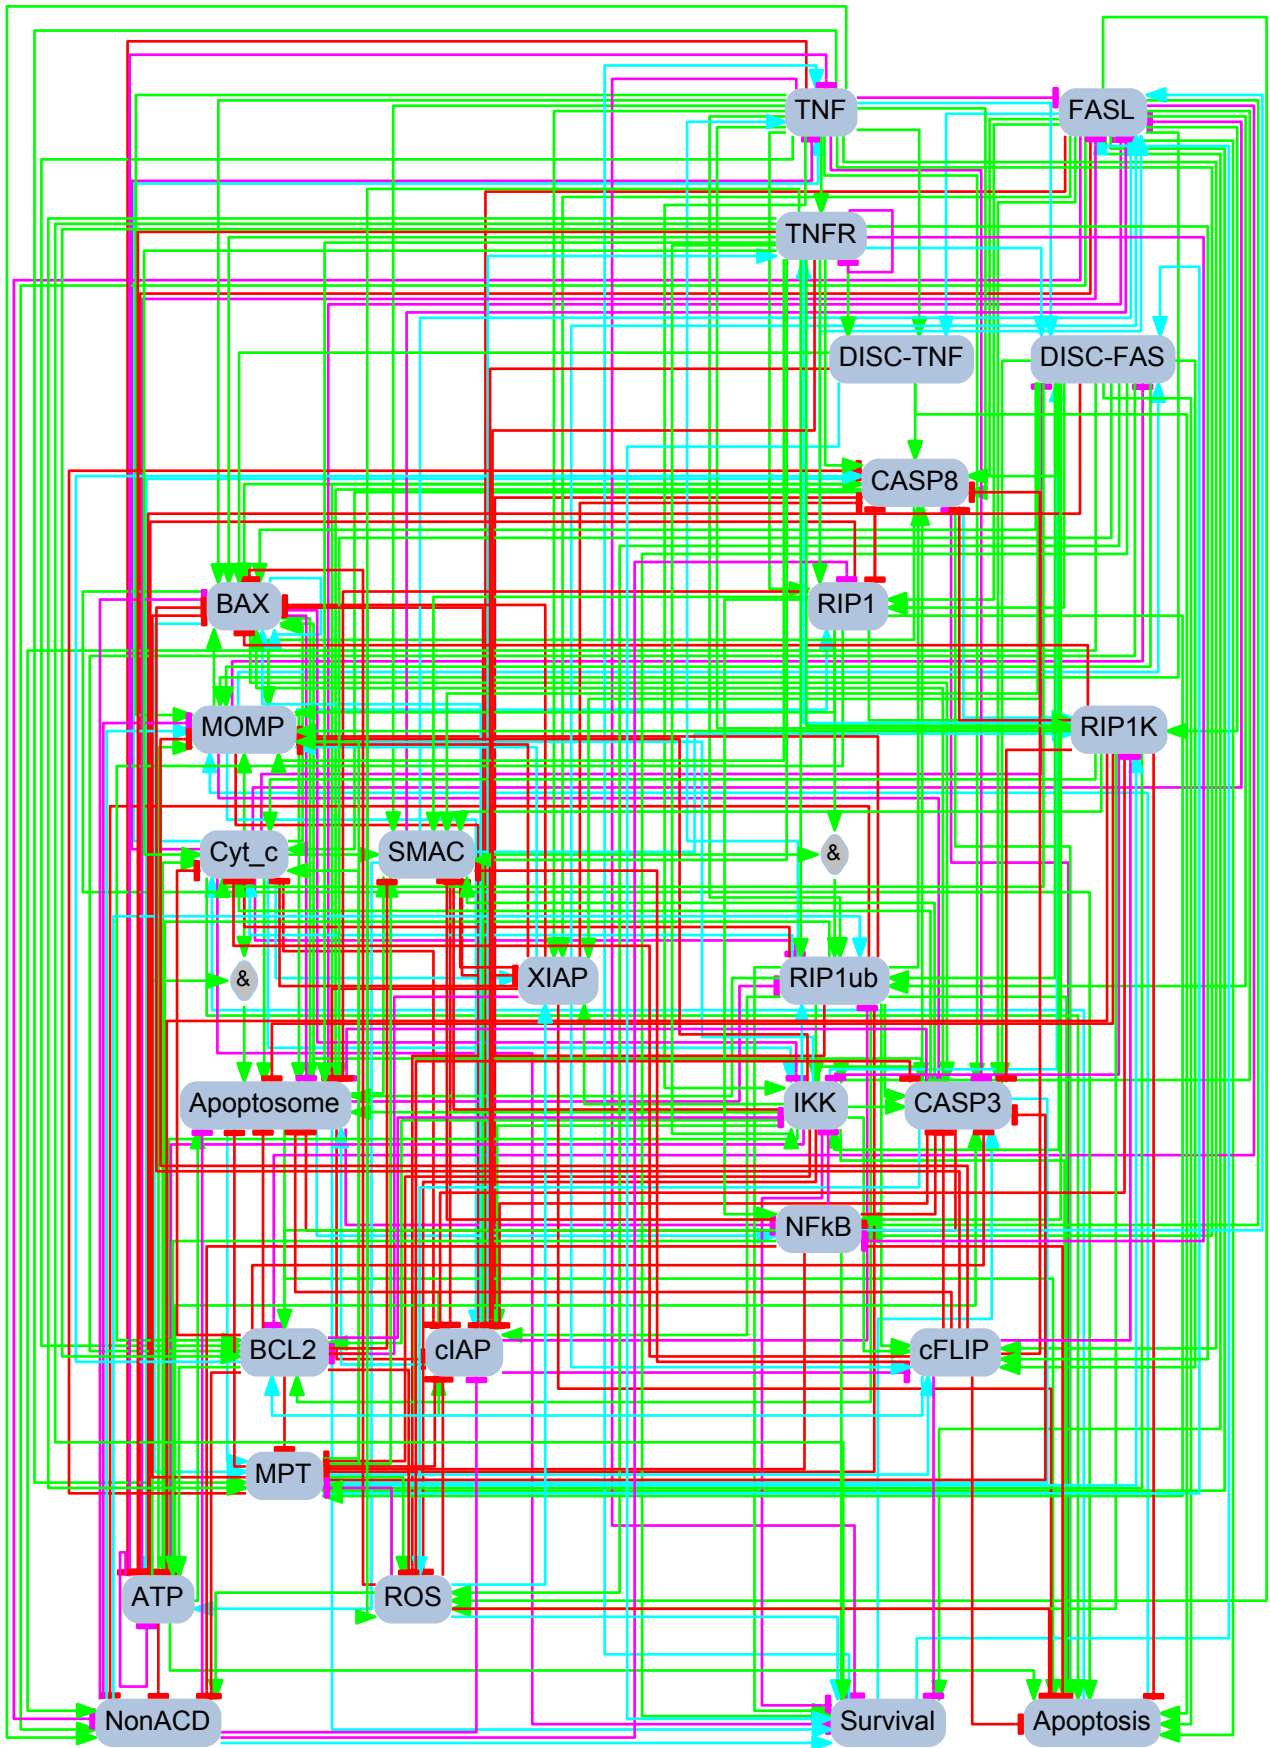

|            |   |            |
|------------|---|------------|
| BCL2       | → | ATP        |
| DISC-FAS   | ⊥ | ATP        |
| FASL       | ⊥ | ATP        |
| IKK        | → | ATP        |
| NFkB       | → | ATP        |
| RIP1       | ⊥ | ATP        |
| RIP1K      | ⊥ | ATP        |
| RIP1ub     | → | ATP        |
| TNF        | ⊥ | ATP        |
| TNFR       | ⊥ | ATP        |
| ATP        | ⊥ | ATP        |
| CASP8      | → | ATP        |
| IKK        | ⊥ | ATP        |
| SMAC       | → | ATP        |
| ATP        | → | Apoptosis  |
| Apoptosome | → | Apoptosis  |
| BAX        | → | Apoptosis  |
| CASP8      | → | Apoptosis  |
| Cyt_c      | → | Apoptosis  |
| DISC-FAS   | → | Apoptosis  |
| DISC-TNF   | → | Apoptosis  |
| FASL       | → | Apoptosis  |
| IKK        | → | Apoptosis  |
| NFkB       | ⊥ | Apoptosis  |
| RIP1K      | ⊥ | Apoptosis  |
| RIP1ub     | → | Apoptosis  |
| ROS        | ⊥ | Apoptosis  |
| XIAP       | ⊥ | Apoptosis  |
| cFLIP      | ⊥ | Apoptosis  |
| ATP        | → | Apoptosome |
| BAX        | → | Apoptosome |
| BCL2       | ⊥ | Apoptosome |
| CASP8      | → | Apoptosome |
| Cyt_c      | → | Apoptosome |
| Cyt_c&ATP  | → | Apoptosome |
| DISC-FAS   | → | Apoptosome |
| IKK        | → | Apoptosome |
| MOMP       | → | Apoptosome |
| MPT        | ⊥ | Apoptosome |
| NFkB       | ⊥ | Apoptosome |
| RIP1       | ⊥ | Apoptosome |
| RIP1K      | ⊥ | Apoptosome |
| RIP1ub     | → | Apoptosome |
| TNFR       | → | Apoptosome |
| XIAP       | ⊥ | Apoptosome |
| cFLIP      | ⊥ | Apoptosome |
| BAX        | ⊥ | Apoptosome |
| CASP3      | ⊥ | Apoptosome |
| NonACD     | ⊥ | Apoptosome |
| cIAP       | → | Apoptosome |
| Apoptosome | → | BAX        |
| BCL2       | ⊥ | BAX        |
| CASP3      | → | BAX        |
| CASP8      | → | BAX        |
| Cyt_c      | → | BAX        |
| DISC-FAS   | → | BAX        |
| DISC-TNF   | → | BAX        |
| MOMP       | → | BAX        |
| MPT        | ⊥ | BAX        |
| RIP1K      | ⊥ | BAX        |
| ROS        | ⊥ | BAX        |
| TNF        | → | BAX        |
| TNFR       | → | BAX        |
| XIAP       | ⊥ | BAX        |
| cFLIP      | ⊥ | BAX        |
| BAX        | → | BAX        |

|            |   |          |
|------------|---|----------|
| NonACD     | ⊥ | BAX      |
| cIAP       | → | BAX      |
| DISC-FAS   | → | BCL2     |
| IKK        | → | BCL2     |
| NFκB       | → | BCL2     |
| RIP1       | → | BCL2     |
| RIP1ub     | → | BCL2     |
| TNF        | → | BCL2     |
| TNFR       | → | BCL2     |
| FASL       | ⊥ | BCL2     |
| XIAP       | ⊥ | BCL2     |
| cFLIP      | → | BCL2     |
| ATP        | → | CASP3    |
| Apoptosome | → | CASP3    |
| BAX        | → | CASP3    |
| BCL2       | ⊥ | CASP3    |
| DISC-FAS   | → | CASP3    |
| FASL       | → | CASP3    |
| IKK        | → | CASP3    |
| MPT        | ⊥ | CASP3    |
| NFκB       | ⊥ | CASP3    |
| RIP1K      | ⊥ | CASP3    |
| RIP1ub     | → | CASP3    |
| ROS        | ⊥ | CASP3    |
| TNF        | → | CASP3    |
| cFLIP      | ⊥ | CASP3    |
| MOMP       | ⊥ | CASP3    |
| Survival   | → | CASP3    |
| TNF        | ⊥ | CASP3    |
| Apoptosome | → | CASP8    |
| DISC-FAS   | → | CASP8    |
| DISC-TNF   | → | CASP8    |
| FASL       | → | CASP8    |
| IKK        | → | CASP8    |
| MPT        | ⊥ | CASP8    |
| RIP1       | ⊥ | CASP8    |
| RIP1K      | ⊥ | CASP8    |
| RIP1ub     | → | CASP8    |
| TNF        | → | CASP8    |
| TNFR       | → | CASP8    |
| XIAP       | ⊥ | CASP8    |
| cFLIP      | ⊥ | CASP8    |
| Apoptosis  | ⊥ | CASP8    |
| BCL2       | → | CASP8    |
| ATP        | → | Cyt_c    |
| BCL2       | ⊥ | Cyt_c    |
| CASP3      | → | Cyt_c    |
| CASP8      | → | Cyt_c    |
| DISC-FAS   | → | Cyt_c    |
| MPT        | → | Cyt_c    |
| RIP1K      | → | Cyt_c    |
| RIP1ub     | ⊥ | Cyt_c    |
| TNFR       | → | Cyt_c    |
| XIAP       | ⊥ | Cyt_c    |
| cFLIP      | ⊥ | Cyt_c    |
| Apoptosis  | → | Cyt_c    |
| RIP1ub     | → | Cyt_c    |
| Cyt_c      | ⊥ | DISC-FAS |
| IKK        | → | DISC-FAS |
| MOMP       | → | DISC-FAS |
| MOMP       | ⊥ | DISC-FAS |
| MPT        | → | DISC-FAS |
| TNF        | → | DISC-FAS |
| TNFR       | → | DISC-FAS |
| TNF        | → | DISC-TNF |
| TNFR       | → | DISC-TNF |

|            |   |          |
|------------|---|----------|
| FASL       | → | DISC-TNF |
| ATP        | ⊥ | FASL     |
| Apoptosome | ⊥ | FASL     |
| Cyt_c      | ⊥ | FASL     |
| NFkB       | → | FASL     |
| RIP1       | → | FASL     |
| SMAC       | → | FASL     |
| SMAC       | ⊥ | FASL     |
| Survival   | → | FASL     |
| TNF        | ⊥ | FASL     |
| XIAP       | → | FASL     |
| DISC-FAS   | → | IKK      |
| FASL       | → | IKK      |
| RIP1ub     | → | IKK      |
| TNF        | → | IKK      |
| TNFR       | → | IKK      |
| BAX        | ⊥ | IKK      |
| BCL2       | ⊥ | IKK      |
| Cyt_c      | → | IKK      |
| NFkB       | ⊥ | IKK      |
| RIP1K      | ⊥ | IKK      |
| ATP        | → | MOMP     |
| CASP8      | → | MOMP     |
| Cyt_c      | → | MOMP     |
| DISC-FAS   | → | MOMP     |
| FASL       | → | MOMP     |
| IKK        | ⊥ | MOMP     |
| MPT        | → | MOMP     |
| RIP1       | → | MOMP     |
| RIP1K      | → | MOMP     |
| RIP1ub     | ⊥ | MOMP     |
| TNF        | → | MOMP     |
| TNFR       | → | MOMP     |
| XIAP       | ⊥ | MOMP     |
| cFLIP      | ⊥ | MOMP     |
| Apoptosis  | → | MOMP     |
| IKK        | → | MOMP     |
| NonACD     | → | MOMP     |
| NonACD     | ⊥ | MOMP     |
| XIAP       | → | MOMP     |
| BCL2       | ⊥ | MPT      |
| FASL       | → | MPT      |
| IKK        | ⊥ | MPT      |
| NFkB       | ⊥ | MPT      |
| RIP1       | → | MPT      |
| RIP1K      | → | MPT      |
| RIP1ub     | ⊥ | MPT      |
| ROS        | → | MPT      |
| TNF        | → | MPT      |
| TNFR       | → | MPT      |
| Apoptosome | → | MPT      |
| BAX        | → | MPT      |
| CASP3      | → | MPT      |
| ROS        | ⊥ | MPT      |
| CASP3      | ⊥ | NFkB     |
| DISC-FAS   | → | NFkB     |
| FASL       | → | NFkB     |
| RIP1       | → | NFkB     |
| TNF        | → | NFkB     |
| Apoptosome | → | NFkB     |
| Apoptosome | ⊥ | NFkB     |
| TNFR       | ⊥ | NFkB     |
| ATP        | ⊥ | NonACD   |
| BCL2       | ⊥ | NonACD   |
| DISC-FAS   | → | NonACD   |
| FASL       | → | NonACD   |

|            |   |          |
|------------|---|----------|
| NFkB       | ⊥ | NonACD   |
| RIP1ub     | ⊥ | NonACD   |
| ROS        | → | NonACD   |
| TNF        | → | NonACD   |
| FASL       | ⊥ | NonACD   |
| CASP8      | ⊥ | RIP1     |
| DISC-FAS   | → | RIP1     |
| FASL       | → | RIP1     |
| TNF        | → | RIP1     |
| TNFR       | → | RIP1     |
| MOMP       | → | RIP1     |
| NonACD     | ⊥ | RIP1     |
| FASL       | → | RIP1K    |
| RIP1       | → | RIP1K    |
| TNF        | → | RIP1K    |
| TNFR       | → | RIP1K    |
| CASP8      | → | RIP1K    |
| MPT        | → | RIP1K    |
| SMAC       | → | RIP1K    |
| cFLIP      | ⊥ | RIP1K    |
| DISC-FAS   | → | RIP1ub   |
| FASL       | → | RIP1ub   |
| TNF        | → | RIP1ub   |
| TNFR       | → | RIP1ub   |
| cIAP&RIP1  | → | RIP1ub   |
| Apoptosome | ⊥ | RIP1ub   |
| Cyt_c      | ⊥ | RIP1ub   |
| IKK        | → | RIP1ub   |
| NonACD     | → | RIP1ub   |
| cIAP       | ⊥ | RIP1ub   |
| BCL2       | ⊥ | ROS      |
| DISC-FAS   | → | ROS      |
| FASL       | → | ROS      |
| IKK        | ⊥ | ROS      |
| MPT        | → | ROS      |
| RIP1K      | → | ROS      |
| RIP1ub     | ⊥ | ROS      |
| TNFR       | → | ROS      |
| CASP3      | → | ROS      |
| Apoptosome | → | SMAC     |
| BCL2       | ⊥ | SMAC     |
| CASP3      | → | SMAC     |
| Cyt_c      | → | SMAC     |
| DISC-FAS   | → | SMAC     |
| IKK        | ⊥ | SMAC     |
| MPT        | → | SMAC     |
| NFkB       | ⊥ | SMAC     |
| RIP1       | → | SMAC     |
| RIP1K      | → | SMAC     |
| TNF        | → | SMAC     |
| TNFR       | → | SMAC     |
| XIAP       | ⊥ | SMAC     |
| cFLIP      | ⊥ | SMAC     |
| DISC-FAS   | → | Survival |
| FASL       | → | Survival |
| NFkB       | → | Survival |
| RIP1ub     | → | Survival |
| TNFR       | → | Survival |
| Apoptosome | → | Survival |
| Cyt_c      | ⊥ | Survival |
| DISC-TNF   | → | Survival |
| IKK        | ⊥ | Survival |
| NonACD     | → | Survival |
| ROS        | → | Survival |
| TNF        | ⊥ | Survival |
| cFLIP      | ⊥ | Survival |

|            |   |       |
|------------|---|-------|
| ATP        | + | TNF   |
| Cyt_c      | → | TNF   |
| Cyt_c      | + | TNF   |
| RIP1ub     | → | TNF   |
| Survival   | → | TNF   |
| TNF        | → | TNFR  |
| RIP1K      | → | TNFR  |
| TNFR       | + | TNFR  |
| cIAP       | → | TNFR  |
| DISC-FAS   | → | XIAP  |
| FASL       | → | XIAP  |
| IKK        | → | XIAP  |
| SMAC       | + | XIAP  |
| TNF        | → | XIAP  |
| Cyt_c      | → | XIAP  |
| ROS        | → | XIAP  |
| DISC-FAS   | → | cFLIP |
| IKK        | → | cFLIP |
| RIP1ub     | → | cFLIP |
| TNF        | → | cFLIP |
| TNFR       | → | cFLIP |
| MPT        | → | cFLIP |
| XIAP       | → | cFLIP |
| cIAP       | + | cFLIP |
| Apoptosome | + | cIAP  |
| BAX        | + | cIAP  |
| CASP3      | + | cIAP  |
| CASP8      | + | cIAP  |
| Cyt_c      | + | cIAP  |
| DISC-TNF   | + | cIAP  |
| FASL       | + | cIAP  |
| IKK        | → | cIAP  |
| MOMP       | + | cIAP  |
| MPT        | + | cIAP  |
| RIP1K      | + | cIAP  |
| RIP1ub     | → | cIAP  |
| ROS        | + | cIAP  |
| SMAC       | + | cIAP  |
| TNFR       | + | cIAP  |
| cIAP       | → | cIAP  |
| MOMP       | → | cIAP  |
| NonACD     | + | cIAP  |



Cell-fate decision model: in-silico PKN 5 (40% noise)

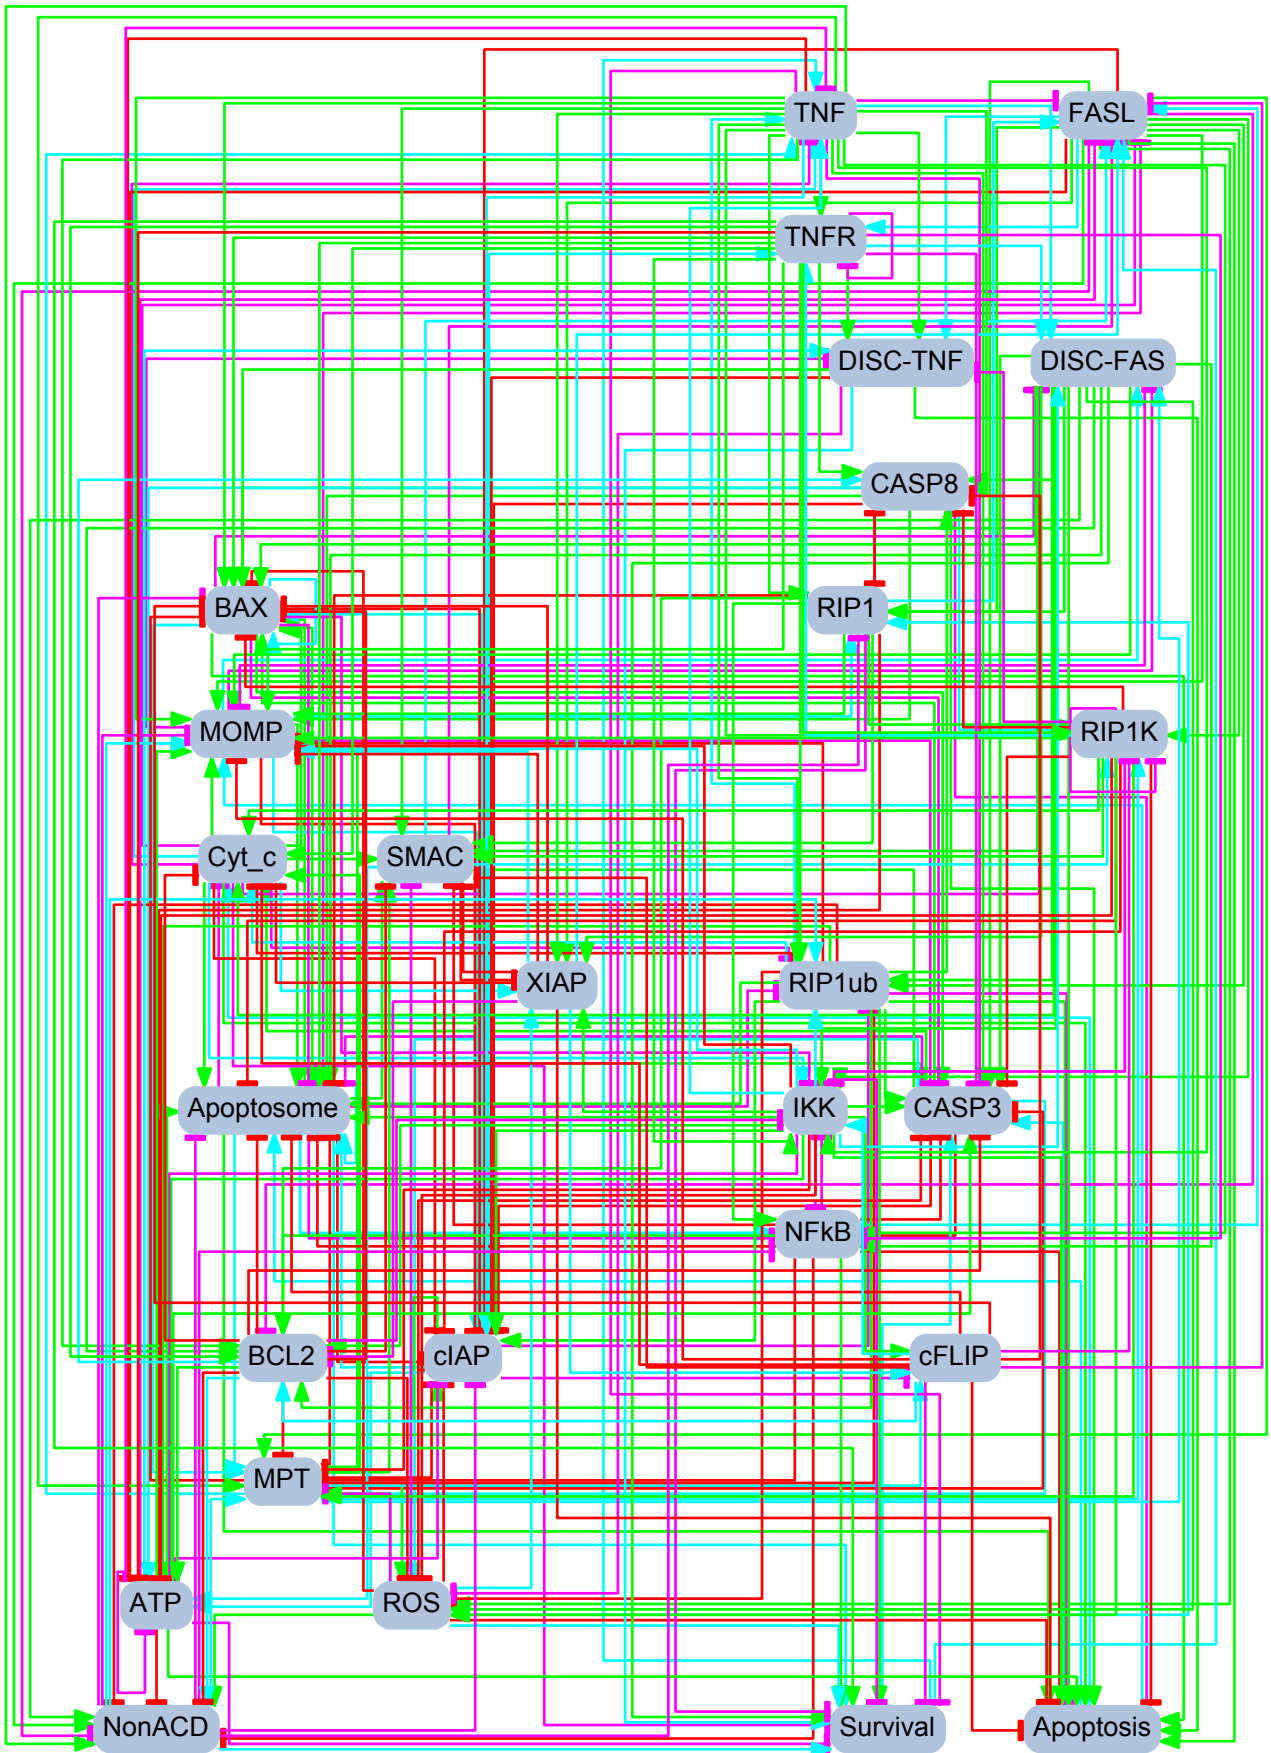

|            |   |            |
|------------|---|------------|
| BCL2       | → | ATP        |
| FASL       | ⊥ | ATP        |
| IKK        | → | ATP        |
| RIP1       | ⊥ | ATP        |
| RIP1K      | ⊥ | ATP        |
| RIP1ub     | → | ATP        |
| TNF        | ⊥ | ATP        |
| TNFR       | ⊥ | ATP        |
| ATP        | ⊥ | ATP        |
| CASP8      | → | ATP        |
| IKK        | ⊥ | ATP        |
| SMAC       | → | ATP        |
| cIAP       | → | ATP        |
| ATP        | → | Apoptosis  |
| Apoptosome | → | Apoptosis  |
| BAX        | → | Apoptosis  |
| CASP8      | → | Apoptosis  |
| Cyt_c      | → | Apoptosis  |
| DISC-FAS   | → | Apoptosis  |
| DISC-TNF   | → | Apoptosis  |
| FASL       | → | Apoptosis  |
| IKK        | → | Apoptosis  |
| NFkB       | ⊥ | Apoptosis  |
| RIP1K      | ⊥ | Apoptosis  |
| RIP1ub     | → | Apoptosis  |
| ROS        | ⊥ | Apoptosis  |
| XIAP       | ⊥ | Apoptosis  |
| cFLIP      | ⊥ | Apoptosis  |
| RIP1ub     | ⊥ | Apoptosis  |
| ATP        | → | Apoptosome |
| BAX        | → | Apoptosome |
| BCL2       | ⊥ | Apoptosome |
| CASP8      | → | Apoptosome |
| Cyt_c      | → | Apoptosome |
| DISC-FAS   | → | Apoptosome |
| IKK        | → | Apoptosome |
| MOMP       | → | Apoptosome |
| MPT        | ⊥ | Apoptosome |
| NFkB       | ⊥ | Apoptosome |
| RIP1       | ⊥ | Apoptosome |
| RIP1K      | ⊥ | Apoptosome |
| RIP1ub     | → | Apoptosome |
| TNFR       | → | Apoptosome |
| cFLIP      | ⊥ | Apoptosome |
| Apoptosis  | → | Apoptosome |
| Apoptosome | → | Apoptosome |
| BAX        | ⊥ | Apoptosome |
| CASP3      | ⊥ | Apoptosome |
| NonACD     | ⊥ | Apoptosome |
| cIAP       | → | Apoptosome |
| Apoptosome | → | BAX        |
| BCL2       | ⊥ | BAX        |
| CASP3      | → | BAX        |
| CASP8      | → | BAX        |
| Cyt_c      | → | BAX        |
| DISC-FAS   | → | BAX        |
| DISC-TNF   | → | BAX        |
| MPT        | ⊥ | BAX        |
| RIP1K      | ⊥ | BAX        |
| ROS        | ⊥ | BAX        |
| TNF        | → | BAX        |
| TNFR       | → | BAX        |
| XIAP       | ⊥ | BAX        |
| cFLIP      | ⊥ | BAX        |
| BAX        | → | BAX        |
| NonACD     | ⊥ | BAX        |

|            |   |          |
|------------|---|----------|
| cIAP       | → | BAX      |
| DISC-FAS   | → | BCL2     |
| IKK        | → | BCL2     |
| NFkB       | → | BCL2     |
| RIP1       | → | BCL2     |
| RIP1ub     | → | BCL2     |
| TNF        | → | BCL2     |
| TNFR       | → | BCL2     |
| FASL       | † | BCL2     |
| XIAP       | † | BCL2     |
| cFLIP      | → | BCL2     |
| ATP        | → | CASP3    |
| Apoptosome | → | CASP3    |
| BAX        | → | CASP3    |
| BCL2       | † | CASP3    |
| DISC-FAS   | → | CASP3    |
| FASL       | → | CASP3    |
| IKK        | → | CASP3    |
| MPT        | † | CASP3    |
| NFkB       | † | CASP3    |
| RIP1K      | † | CASP3    |
| RIP1ub     | → | CASP3    |
| ROS        | † | CASP3    |
| TNF        | → | CASP3    |
| Apoptosis  | → | CASP3    |
| BAX        | † | CASP3    |
| MOMP       | † | CASP3    |
| Survival   | → | CASP3    |
| TNF        | † | CASP3    |
| TNFR       | † | CASP3    |
| DISC-FAS   | → | CASP8    |
| RIP1       | † | CASP8    |
| RIP1K      | † | CASP8    |
| RIP1ub     | → | CASP8    |
| TNF        | → | CASP8    |
| TNFR       | → | CASP8    |
| cFLIP      | † | CASP8    |
| Apoptosis  | † | CASP8    |
| BCL2       | → | CASP8    |
| BCL2       | † | Cyt_c    |
| CASP3      | → | Cyt_c    |
| DISC-FAS   | → | Cyt_c    |
| MPT        | → | Cyt_c    |
| RIP1K      | → | Cyt_c    |
| RIP1ub     | † | Cyt_c    |
| TNFR       | → | Cyt_c    |
| XIAP       | † | Cyt_c    |
| cFLIP      | † | Cyt_c    |
| Apoptosis  | → | Cyt_c    |
| Apoptosome | † | Cyt_c    |
| RIP1ub     | → | Cyt_c    |
| BAX        | † | DISC-FAS |
| Cyt_c      | † | DISC-FAS |
| IKK        | → | DISC-FAS |
| MOMP       | → | DISC-FAS |
| MOMP       | † | DISC-FAS |
| MPT        | → | DISC-FAS |
| TNF        | → | DISC-FAS |
| TNFR       | → | DISC-FAS |
| TNF        | → | DISC-TNF |
| TNFR       | → | DISC-TNF |
| ATP        | → | DISC-TNF |
| FASL       | → | DISC-TNF |
| MOMP       | † | DISC-TNF |
| RIP1K      | † | DISC-TNF |
| ATP        | † | FASL     |

|            |   |        |
|------------|---|--------|
| Apoptosome | ⊥ | FASL   |
| Cyt_c      | ⊥ | FASL   |
| NFkB       | → | FASL   |
| RIP1       | → | FASL   |
| SMAC       | → | FASL   |
| SMAC       | ⊥ | FASL   |
| Survival   | → | FASL   |
| TNF        | ⊥ | FASL   |
| XIAP       | → | FASL   |
| cFLIP      | ⊥ | FASL   |
| DISC-FAS   | → | IKK    |
| FASL       | → | IKK    |
| TNF        | → | IKK    |
| TNFR       | → | IKK    |
| BAX        | ⊥ | IKK    |
| BCL2       | ⊥ | IKK    |
| Cyt_c      | → | IKK    |
| NFkB       | ⊥ | IKK    |
| RIP1K      | ⊥ | IKK    |
| cFLIP      | → | IKK    |
| ATP        | → | MOMP   |
| CASP8      | → | MOMP   |
| Cyt_c      | → | MOMP   |
| DISC-FAS   | → | MOMP   |
| FASL       | → | MOMP   |
| IKK        | ⊥ | MOMP   |
| MPT        | → | MOMP   |
| RIP1       | → | MOMP   |
| RIP1K      | → | MOMP   |
| RIP1ub     | ⊥ | MOMP   |
| TNF        | → | MOMP   |
| TNFR       | → | MOMP   |
| XIAP       | ⊥ | MOMP   |
| cFLIP      | ⊥ | MOMP   |
| Apoptosis  | → | MOMP   |
| DISC-FAS   | ⊥ | MOMP   |
| IKK        | → | MOMP   |
| NonACD     | → | MOMP   |
| NonACD     | ⊥ | MOMP   |
| XIAP       | → | MOMP   |
| BCL2       | ⊥ | MPT    |
| FASL       | → | MPT    |
| IKK        | ⊥ | MPT    |
| NFkB       | ⊥ | MPT    |
| RIP1K      | → | MPT    |
| RIP1ub     | ⊥ | MPT    |
| ROS        | → | MPT    |
| TNF        | → | MPT    |
| Apoptosome | → | MPT    |
| BAX        | → | MPT    |
| CASP3      | → | MPT    |
| NonACD     | → | MPT    |
| ROS        | ⊥ | MPT    |
| CASP3      | ⊥ | NFkB   |
| DISC-FAS   | → | NFkB   |
| RIP1       | → | NFkB   |
| TNF        | → | NFkB   |
| Apoptosome | → | NFkB   |
| Apoptosome | ⊥ | NFkB   |
| IKK        | ⊥ | NFkB   |
| NonACD     | ⊥ | NFkB   |
| TNFR       | ⊥ | NFkB   |
| ATP        | ⊥ | NonACD |
| BCL2       | ⊥ | NonACD |
| DISC-FAS   | → | NonACD |
| FASL       | → | NonACD |

|            |   |          |
|------------|---|----------|
| NFkB       | † | NonACD   |
| RIP1ub     | † | NonACD   |
| ROS        | → | NonACD   |
| TNF        | → | NonACD   |
| BCL2       | → | NonACD   |
| FASL       | † | NonACD   |
| CASP8      | † | RIP1     |
| DISC-FAS   | → | RIP1     |
| FASL       | → | RIP1     |
| TNF        | → | RIP1     |
| MOMP       | → | RIP1     |
| NonACD     | † | RIP1     |
| ROS        | → | RIP1     |
| FASL       | → | RIP1K    |
| RIP1       | → | RIP1K    |
| TNF        | → | RIP1K    |
| TNFR       | → | RIP1K    |
| CASP8      | → | RIP1K    |
| MPT        | → | RIP1K    |
| RIP1K      | † | RIP1K    |
| SMAC       | → | RIP1K    |
| cFLIP      | † | RIP1K    |
| DISC-FAS   | → | RIP1ub   |
| FASL       | → | RIP1ub   |
| TNF        | → | RIP1ub   |
| TNFR       | → | RIP1ub   |
| Apoptosome | † | RIP1ub   |
| Cyt_c      | † | RIP1ub   |
| IKK        | → | RIP1ub   |
| NonACD     | → | RIP1ub   |
| cIAP       | † | RIP1ub   |
| BCL2       | † | ROS      |
| DISC-FAS   | → | ROS      |
| FASL       | → | ROS      |
| IKK        | † | ROS      |
| MPT        | → | ROS      |
| RIP1K      | → | ROS      |
| RIP1ub     | † | ROS      |
| CASP3      | → | ROS      |
| DISC-TNF   | † | ROS      |
| Apoptosome | → | SMAC     |
| BCL2       | † | SMAC     |
| CASP3      | → | SMAC     |
| Cyt_c      | → | SMAC     |
| DISC-FAS   | → | SMAC     |
| MPT        | → | SMAC     |
| NFkB       | † | SMAC     |
| RIP1       | → | SMAC     |
| RIP1K      | → | SMAC     |
| TNF        | → | SMAC     |
| XIAP       | † | SMAC     |
| cFLIP      | † | SMAC     |
| ROS        | † | SMAC     |
| DISC-FAS   | → | Survival |
| NFkB       | → | Survival |
| RIP1ub     | → | Survival |
| TNFR       | → | Survival |
| ATP        | † | Survival |
| Apoptosome | → | Survival |
| Cyt_c      | † | Survival |
| DISC-TNF   | → | Survival |
| IKK        | † | Survival |
| NonACD     | → | Survival |
| RIP1       | † | Survival |
| ROS        | → | Survival |
| TNF        | † | Survival |

|            |   |          |
|------------|---|----------|
| cFLIP      | + | Survival |
| ATP        | + | TNF      |
| Cyt_c      | → | TNF      |
| Cyt_c      | + | TNF      |
| IKK        | → | TNF      |
| MPT        | → | TNF      |
| RIP1ub     | → | TNF      |
| Survival   | → | TNF      |
| TNF        | → | TNFR     |
| FASL       | → | TNFR     |
| RIP1K      | → | TNFR     |
| TNFR       | + | TNFR     |
| cIAP       | → | TNFR     |
| DISC-FAS   | → | XIAP     |
| FASL       | → | XIAP     |
| IKK        | → | XIAP     |
| SMAC       | + | XIAP     |
| TNF        | → | XIAP     |
| Cyt_c      | → | XIAP     |
| ROS        | → | XIAP     |
| IKK        | → | cFLIP    |
| MPT        | → | cFLIP    |
| XIAP       | → | cFLIP    |
| cIAP       | + | cFLIP    |
| Apoptosome | + | cIAP     |
| BAX        | + | cIAP     |
| CASP3      | + | cIAP     |
| CASP8      | + | cIAP     |
| Cyt_c      | + | cIAP     |
| DISC-TNF   | + | cIAP     |
| FASL       | + | cIAP     |
| IKK        | → | cIAP     |
| MOMP       | + | cIAP     |
| MPT        | + | cIAP     |
| RIP1K      | + | cIAP     |
| RIP1ub     | → | cIAP     |
| ROS        | + | cIAP     |
| cIAP       | → | cIAP     |
| ATP        | + | cIAP     |
| MOMP       | → | cIAP     |
| NonACD     | + | cIAP     |
| TNF        | → | cIAP     |

# Cell-fate decision model: in-silico PKN 6 (50% noise)

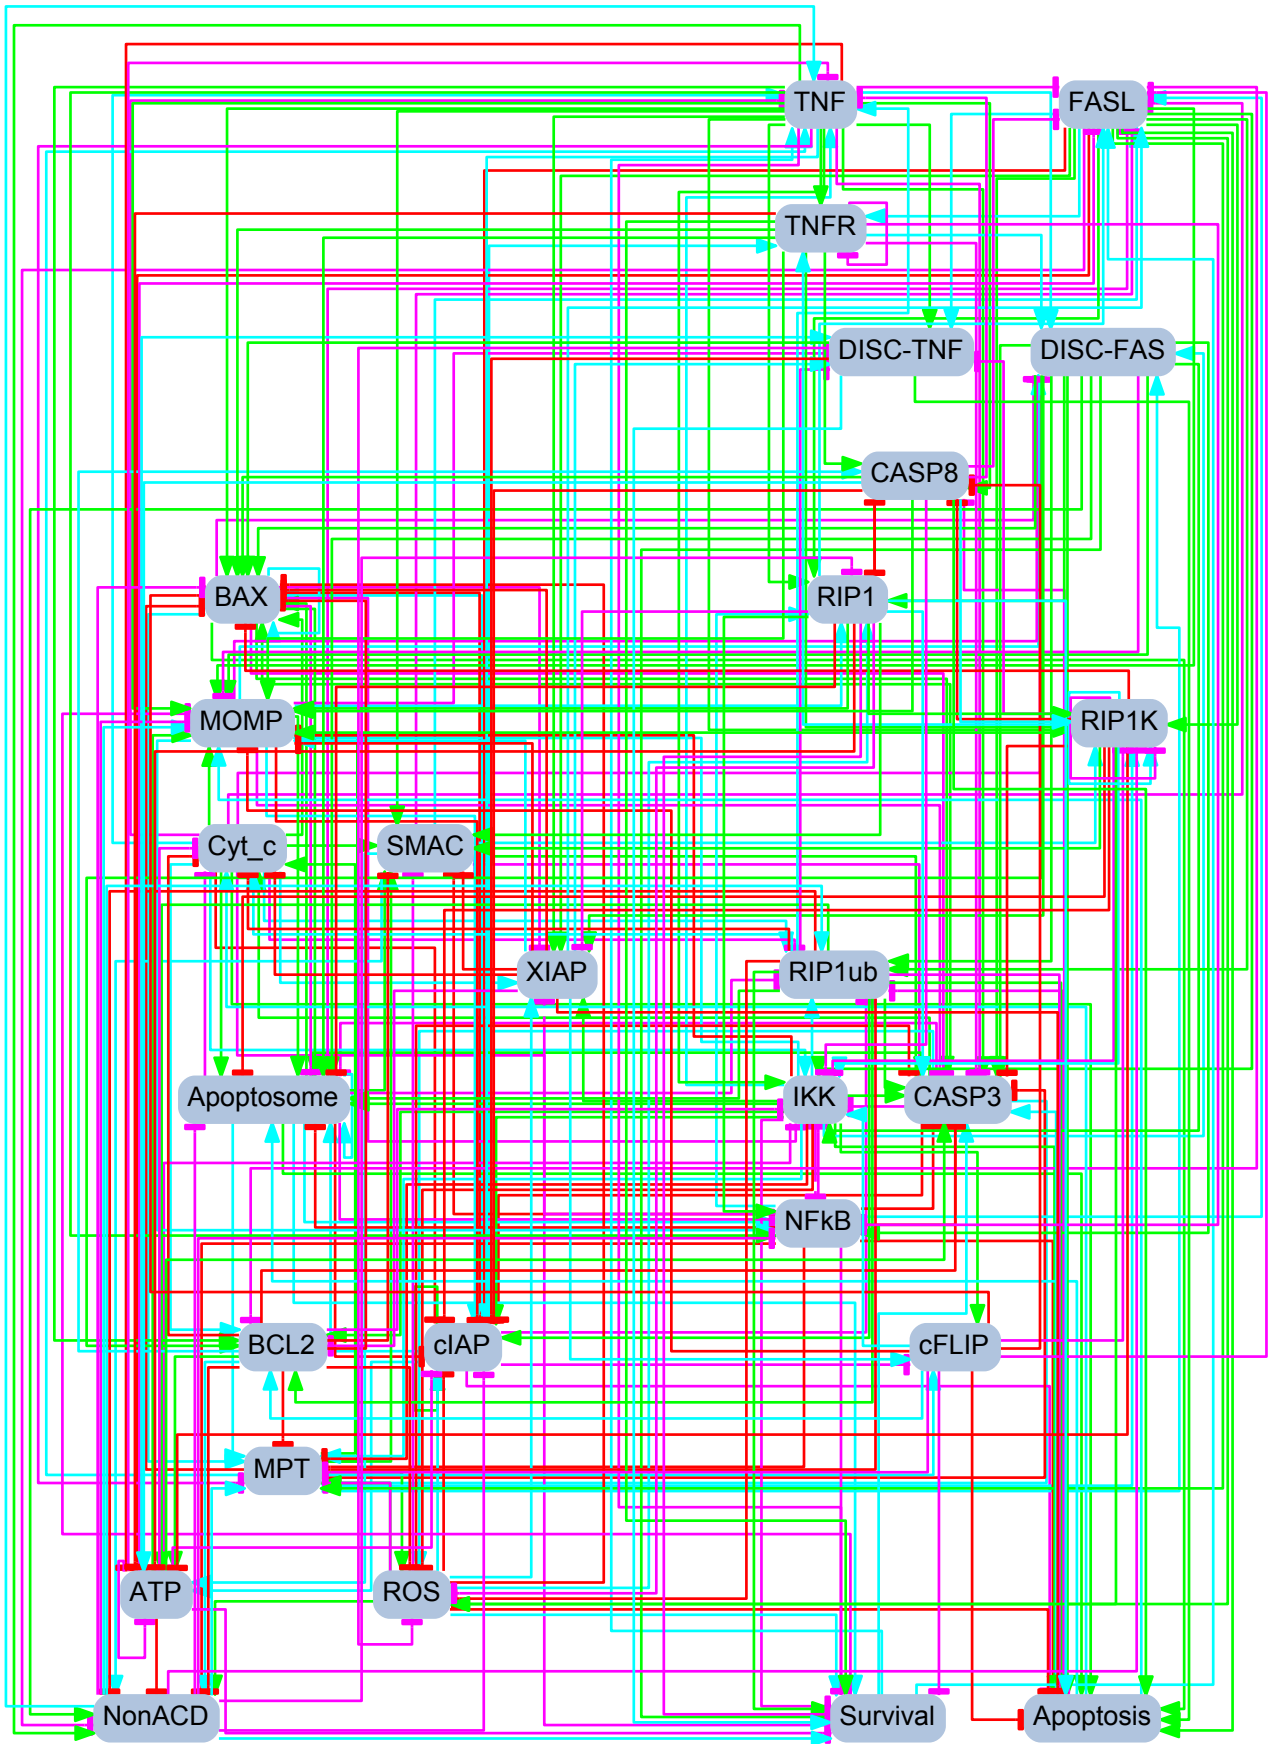

|            |   |            |
|------------|---|------------|
| BCL2       | → | ATP        |
| FASL       | ⊥ | ATP        |
| RIP1       | ⊥ | ATP        |
| RIP1K      | ⊥ | ATP        |
| RIP1ub     | → | ATP        |
| TNF        | ⊥ | ATP        |
| TNFR       | ⊥ | ATP        |
| ATP        | ⊥ | ATP        |
| CASP8      | → | ATP        |
| IKK        | ⊥ | ATP        |
| SMAC       | → | ATP        |
| cIAP       | → | ATP        |
| Apoptosome | → | Apoptosis  |
| BAX        | → | Apoptosis  |
| CASP8      | → | Apoptosis  |
| Cyt_c      | → | Apoptosis  |
| DISC-FAS   | → | Apoptosis  |
| DISC-TNF   | → | Apoptosis  |
| FASL       | → | Apoptosis  |
| IKK        | → | Apoptosis  |
| NFκB       | ⊥ | Apoptosis  |
| RIP1ub     | → | Apoptosis  |
| ROS        | ⊥ | Apoptosis  |
| XIAP       | ⊥ | Apoptosis  |
| cFLIP      | ⊥ | Apoptosis  |
| RIP1       | → | Apoptosis  |
| RIP1ub     | ⊥ | Apoptosis  |
| cIAP       | ⊥ | Apoptosis  |
| BAX        | → | Apoptosome |
| Cyt_c      | → | Apoptosome |
| DISC-FAS   | → | Apoptosome |
| IKK        | → | Apoptosome |
| MOMP       | → | Apoptosome |
| NFκB       | ⊥ | Apoptosome |
| RIP1       | ⊥ | Apoptosome |
| RIP1K      | ⊥ | Apoptosome |
| RIP1ub     | → | Apoptosome |
| TNFR       | → | Apoptosome |
| Apoptosis  | → | Apoptosome |
| Apoptosome | → | Apoptosome |
| BAX        | ⊥ | Apoptosome |
| CASP3      | ⊥ | Apoptosome |
| NonACD     | ⊥ | Apoptosome |
| cIAP       | → | Apoptosome |
| Apoptosome | → | BAX        |
| BCL2       | ⊥ | BAX        |
| CASP3      | → | BAX        |
| CASP8      | → | BAX        |
| Cyt_c      | → | BAX        |
| DISC-FAS   | → | BAX        |
| DISC-TNF   | → | BAX        |
| MPT        | ⊥ | BAX        |
| RIP1K      | ⊥ | BAX        |
| ROS        | ⊥ | BAX        |
| TNF        | → | BAX        |
| TNFR       | → | BAX        |
| XIAP       | ⊥ | BAX        |
| cFLIP      | ⊥ | BAX        |
| BAX        | → | BAX        |
| NonACD     | ⊥ | BAX        |
| cIAP       | → | BAX        |
| DISC-FAS   | → | BCL2       |
| IKK        | → | BCL2       |
| RIP1ub     | → | BCL2       |
| TNF        | → | BCL2       |
| Cyt_c      | → | BCL2       |



|            |   |          |
|------------|---|----------|
| FASL       | + | BCL2     |
| XIAP       | + | BCL2     |
| cFLIP      | → | BCL2     |
| ATP        | → | CASP3    |
| Apoptosome | → | CASP3    |
| BAX        | → | CASP3    |
| BCL2       | + | CASP3    |
| DISC-FAS   | → | CASP3    |
| FASL       | → | CASP3    |
| IKK        | → | CASP3    |
| MPT        | + | CASP3    |
| NFkB       | + | CASP3    |
| RIP1K      | + | CASP3    |
| RIP1ub     | → | CASP3    |
| ROS        | + | CASP3    |
| TNF        | → | CASP3    |
| Apoptosis  | → | CASP3    |
| BAX        | + | CASP3    |
| MOMP       | + | CASP3    |
| RIP1       | → | CASP3    |
| Survival   | → | CASP3    |
| TNF        | + | CASP3    |
| TNFR       | + | CASP3    |
| RIP1       | + | CASP8    |
| RIP1K      | + | CASP8    |
| TNF        | → | CASP8    |
| TNFR       | → | CASP8    |
| cFLIP      | + | CASP8    |
| Apoptosis  | + | CASP8    |
| BCL2       | → | CASP8    |
| BCL2       | + | Cyt_c    |
| CASP3      | → | Cyt_c    |
| MPT        | → | Cyt_c    |
| RIP1ub     | + | Cyt_c    |
| XIAP       | + | Cyt_c    |
| ATP        | + | Cyt_c    |
| Apoptosis  | → | Cyt_c    |
| Apoptosome | + | Cyt_c    |
| RIP1ub     | → | Cyt_c    |
| BAX        | + | DISC-FAS |
| Cyt_c      | + | DISC-FAS |
| IKK        | → | DISC-FAS |
| MOMP       | → | DISC-FAS |
| MOMP       | + | DISC-FAS |
| MPT        | → | DISC-FAS |
| TNF        | → | DISC-FAS |
| TNFR       | → | DISC-FAS |
| TNF        | → | DISC-TNF |
| ATP        | → | DISC-TNF |
| FASL       | → | DISC-TNF |
| MOMP       | + | DISC-TNF |
| RIP1K      | + | DISC-TNF |
| RIP1ub     | + | DISC-TNF |
| XIAP       | → | DISC-TNF |
| ATP        | + | FASL     |
| Apoptosome | + | FASL     |
| CASP8      | + | FASL     |
| Cyt_c      | + | FASL     |
| NFkB       | → | FASL     |
| RIP1       | → | FASL     |
| SMAC       | → | FASL     |
| SMAC       | + | FASL     |
| Survival   | → | FASL     |
| TNF        | + | FASL     |
| XIAP       | → | FASL     |
| cFLIP      | + | FASL     |

|            |   |        |
|------------|---|--------|
| DISC-FAS   | → | IKK    |
| FASL       | → | IKK    |
| TNF        | → | IKK    |
| BAX        | † | IKK    |
| BCL2       | † | IKK    |
| CASP3      | † | IKK    |
| CASP8      | † | IKK    |
| Cyt_c      | → | IKK    |
| NFkB       | † | IKK    |
| RIP1K      | → | IKK    |
| RIP1K      | † | IKK    |
| cFLIP      | → | IKK    |
| ATP        | → | MOMP   |
| CASP8      | → | MOMP   |
| Cyt_c      | → | MOMP   |
| DISC-FAS   | → | MOMP   |
| FASL       | → | MOMP   |
| IKK        | † | MOMP   |
| MPT        | → | MOMP   |
| RIP1       | → | MOMP   |
| RIP1K      | → | MOMP   |
| TNF        | → | MOMP   |
| TNFR       | → | MOMP   |
| XIAP       | † | MOMP   |
| cFLIP      | † | MOMP   |
| Apoptosis  | → | MOMP   |
| DISC-FAS   | † | MOMP   |
| IKK        | → | MOMP   |
| NonACD     | → | MOMP   |
| NonACD     | † | MOMP   |
| Survival   | † | MOMP   |
| XIAP       | → | MOMP   |
| BCL2       | † | MPT    |
| FASL       | → | MPT    |
| IKK        | † | MPT    |
| NFkB       | † | MPT    |
| RIP1ub     | † | MPT    |
| ROS        | → | MPT    |
| Apoptosome | → | MPT    |
| BAX        | → | MPT    |
| CASP3      | → | MPT    |
| IKK        | → | MPT    |
| NonACD     | → | MPT    |
| ROS        | † | MPT    |
| TNF        | † | MPT    |
| cFLIP      | † | MPT    |
| CASP3      | † | NFkB   |
| DISC-FAS   | → | NFkB   |
| RIP1       | → | NFkB   |
| TNF        | → | NFkB   |
| Apoptosome | → | NFkB   |
| Apoptosome | † | NFkB   |
| IKK        | † | NFkB   |
| MOMP       | → | NFkB   |
| NonACD     | † | NFkB   |
| TNFR       | † | NFkB   |
| ATP        | † | NonACD |
| BCL2       | † | NonACD |
| DISC-FAS   | → | NonACD |
| NFkB       | † | NonACD |
| RIP1ub     | † | NonACD |
| ROS        | → | NonACD |
| TNF        | → | NonACD |
| BCL2       | → | NonACD |
| FASL       | † | NonACD |
| SMAC       | → | NonACD |

|            |   |          |
|------------|---|----------|
| CASP8      | + | RIP1     |
| DISC-FAS   | → | RIP1     |
| FASL       | → | RIP1     |
| TNF        | → | RIP1     |
| MOMP       | → | RIP1     |
| NFkB       | → | RIP1     |
| NonACD     | + | RIP1     |
| ROS        | → | RIP1     |
| FASL       | → | RIP1K    |
| RIP1       | → | RIP1K    |
| TNF        | → | RIP1K    |
| TNFR       | → | RIP1K    |
| CASP8      | → | RIP1K    |
| MPT        | → | RIP1K    |
| NonACD     | + | RIP1K    |
| RIP1K      | → | RIP1K    |
| RIP1K      | + | RIP1K    |
| SMAC       | → | RIP1K    |
| cFLIP      | + | RIP1K    |
| DISC-FAS   | → | RIP1ub   |
| FASL       | → | RIP1ub   |
| Apoptosis  | + | RIP1ub   |
| Apoptosome | + | RIP1ub   |
| Cyt_c      | → | RIP1ub   |
| Cyt_c      | + | RIP1ub   |
| IKK        | → | RIP1ub   |
| NonACD     | → | RIP1ub   |
| cIAP       | + | RIP1ub   |
| BCL2       | + | ROS      |
| FASL       | → | ROS      |
| IKK        | + | ROS      |
| MPT        | → | ROS      |
| RIP1K      | → | ROS      |
| RIP1ub     | + | ROS      |
| CASP3      | → | ROS      |
| DISC-TNF   | + | ROS      |
| RIP1       | + | ROS      |
| Apoptosome | → | SMAC     |
| BCL2       | + | SMAC     |
| CASP3      | → | SMAC     |
| Cyt_c      | → | SMAC     |
| MPT        | → | SMAC     |
| NFkB       | + | SMAC     |
| RIP1       | → | SMAC     |
| RIP1K      | → | SMAC     |
| TNF        | → | SMAC     |
| XIAP       | + | SMAC     |
| CASP3      | + | SMAC     |
| ROS        | + | SMAC     |
| DISC-FAS   | → | Survival |
| RIP1ub     | → | Survival |
| TNFR       | → | Survival |
| ATP        | + | Survival |
| Apoptosome | → | Survival |
| Cyt_c      | + | Survival |
| DISC-TNF   | → | Survival |
| IKK        | + | Survival |
| NFkB       | + | Survival |
| NonACD     | → | Survival |
| RIP1       | + | Survival |
| ROS        | → | Survival |
| TNF        | + | Survival |
| cFLIP      | + | Survival |
| ATP        | + | TNF      |
| CASP8      | + | TNF      |
| Cyt_c      | → | TNF      |

|            |   |       |
|------------|---|-------|
| Cyt_c      | ⊥ | TNF   |
| IKK        | → | TNF   |
| MPT        | → | TNF   |
| NonACD     | → | TNF   |
| RIP1ub     | → | TNF   |
| Survival   | → | TNF   |
| TNF        | → | TNFR  |
| FASL       | → | TNFR  |
| RIP1K      | → | TNFR  |
| TNFR       | ⊥ | TNFR  |
| cIAP       | → | TNFR  |
| DISC-FAS   | → | XIAP  |
| FASL       | → | XIAP  |
| IKK        | → | XIAP  |
| TNF        | → | XIAP  |
| BAX        | ⊥ | XIAP  |
| Cyt_c      | → | XIAP  |
| NFkB       | ⊥ | XIAP  |
| RIP1       | ⊥ | XIAP  |
| ROS        | → | XIAP  |
| IKK        | → | cFLIP |
| MPT        | → | cFLIP |
| XIAP       | → | cFLIP |
| cIAP       | ⊥ | cFLIP |
| Apoptosome | ⊥ | cIAP  |
| BAX        | ⊥ | cIAP  |
| CASP3      | ⊥ | cIAP  |
| CASP8      | ⊥ | cIAP  |
| Cyt_c      | ⊥ | cIAP  |
| DISC-TNF   | ⊥ | cIAP  |
| FASL       | ⊥ | cIAP  |
| IKK        | → | cIAP  |
| MOMP       | ⊥ | cIAP  |
| RIP1K      | ⊥ | cIAP  |
| RIP1ub     | → | cIAP  |
| ROS        | ⊥ | cIAP  |
| cIAP       | → | cIAP  |
| ATP        | ⊥ | cIAP  |
| MOMP       | → | cIAP  |
| NonACD     | ⊥ | cIAP  |
| ROS        | → | cIAP  |
| TNF        | → | cIAP  |
