# Supplementary material for: Boolean regulatory network reconstruction using literature based knowledge with a genetic algorithm optimization method
Source: BMC Bioinformatics. 2016 Oct 6;17:410. doi: 10.1186/s12859-016-1287-z (PMC5053080; doi:10.1186/s12859-016-1287-z)
Supplement: Additional file 3: — Cell-fate decision model: single node perturbations. List of transitions between attractors from unperturbed to single node perturbations. Each line corresponds to one edge in the attractor reachability graph. Attractors with more than one state are replaced by the average over all states in the attractor. (PDF 63 kb) [file 12859_2016_1287_MOESM3_ESM.pdf]

## Cell-fate decision model: in-silico experiments

[illegible]



[illegible]

[illegible]

| Perturbation | Initial attractor |           |            |     |      |       |       |       |          |          |      |     |      |     |      |        |       |        |     |      | Perturbation | Final attractor |     |      |      |       |               |   |   |   |   |   |   |   |   |   |   |   |   |   |   |   |   |   |   |   |   |
|--------------|-------------------|-----------|------------|-----|------|-------|-------|-------|----------|----------|------|-----|------|-----|------|--------|-------|--------|-----|------|--------------|-----------------|-----|------|------|-------|---------------|---|---|---|---|---|---|---|---|---|---|---|---|---|---|---|---|---|---|---|---|
|              | ATP               | Apoptosis | Apoptosome | BAX | BCL2 | CASP3 | CASP8 | Cyt_c | DISC-FAS | DISC-TNF | FASL | IKK | MOMP | MPT | NFkB | NonACD | RIP1K | RIP1ub | ROS | SMAC |              | Survival        | TNF | TNFR | XIAP | cFLIP | cIAP          |   |   |   |   |   |   |   |   |   |   |   |   |   |   |   |   |   |   |   |   |
|              |                   |           |            |     |      |       |       |       |          |          |      |     |      |     |      |        |       |        |     |      |              |                 |     |      |      |       |               |   |   |   |   |   |   |   |   |   |   |   |   |   |   |   |   |   |   |   |   |
| Unperturbed  | 0                 | 0         | 0          | 0   | 0    | 0     | 0     | 1     | 0        | 0        | 0    | 0   | 1    | 1   | 0    | 1      | 0     | 0      | 0   | 1    | 1            | 0               | 0   | 0    | 0    | 0     | → OE CASP8    | 0 | 0 | 0 | 1 | 0 | 0 | 1 | 1 | 0 | 0 | 0 | 1 | 1 | 0 | 0 | 0 | 0 | 0 | 0 |   |
| Unperturbed  | 0                 | 0         | 0          | 0   | 0    | 0     | 0     | 1     | 0        | 0        | 0    | 0   | 1    | 1   | 0    | 1      | 0     | 0      | 0   | 1    | 1            | 0               | 0   | 0    | 0    | 0     | → OE Cyt_c    | 0 | 0 | 0 | 0 | 0 | 0 | 1 | 0 | 0 | 0 | 1 | 1 | 0 | 0 | 0 | 0 | 0 | 0 |   |   |
| Unperturbed  | 0                 | 0         | 0          | 0   | 0    | 0     | 0     | 1     | 0        | 0        | 0    | 0   | 1    | 1   | 0    | 1      | 0     | 0      | 0   | 1    | 1            | 0               | 0   | 0    | 0    | 0     | → OE DISC-FAS | 0 | 0 | 0 | 1 | 0 | 0 | 1 | 1 | 0 | 0 | 1 | 1 | 0 | 0 | 0 | 0 | 0 | 0 | 0 |   |
| Unperturbed  | 0                 | 0         | 0          | 0   | 0    | 0     | 0     | 1     | 0        | 0        | 0    | 0   | 1    | 1   | 0    | 1      | 0     | 0      | 0   | 1    | 1            | 0               | 0   | 0    | 0    | 0     | → OE DISC-TNF | 0 | 0 | 0 | 1 | 0 | 0 | 1 | 1 | 0 | 0 | 1 | 1 | 0 | 0 | 0 | 0 | 0 | 0 | 0 |   |
| Unperturbed  | 0                 | 0         | 0          | 0   | 0    | 0     | 0     | 1     | 0        | 0        | 0    | 0   | 1    | 1   | 0    | 1      | 0     | 0      | 0   | 1    | 1            | 0               | 0   | 0    | 0    | 0     | → OE FASL     | 0 | 0 | 0 | 1 | 0 | 0 | 1 | 1 | 0 | 1 | 1 | 0 | 0 | 0 | 0 | 0 | 0 | 0 | 0 |   |
| Unperturbed  | 0                 | 0         | 0          | 0   | 0    | 0     | 0     | 1     | 0        | 0        | 0    | 0   | 1    | 1   | 0    | 1      | 0     | 0      | 0   | 1    | 1            | 0               | 0   | 0    | 0    | 0     | → OE IKK      | 1 | 0 | 0 | 1 | 0 | 0 | 0 | 0 | 0 | 1 | 0 | 0 | 1 | 0 | 0 | 0 | 1 | 1 | 1 |   |
| Unperturbed  | 0                 | 0         | 0          | 0   | 0    | 0     | 0     | 1     | 0        | 0        | 0    | 0   | 1    | 1   | 0    | 1      | 0     | 0      | 0   | 1    | 1            | 0               | 0   | 0    | 0    | 0     | → OE IKK      | 1 | 1 | 1 | 1 | 0 | 1 | 1 | 1 | 0 | 0 | 0 | 0 | 0 | 0 | 0 | 0 | 0 | 0 |   |   |
| Unperturbed  | 0                 | 0         | 0          | 0   | 0    | 0     | 0     | 1     | 0        | 0        | 0    | 0   | 1    | 1   | 0    | 1      | 0     | 0      | 0   | 1    | 1            | 0               | 0   | 0    | 0    | 0     | → OE MOMP     | 0 | 0 | 0 | 0 | 0 | 0 | 1 | 0 | 0 | 0 | 1 | 1 | 0 | 1 | 0 | 0 | 0 | 0 | 0 |   |
| Unperturbed  | 0                 | 0         | 0          | 0   | 0    | 0     | 0     | 1     | 0        | 0        | 0    | 0   | 1    | 1   | 0    | 1      | 0     | 0      | 0   | 1    | 1            | 0               | 0   | 0    | 0    | 0     | → OE MPT      | 0 | 0 | 0 | 0 | 0 | 0 | 1 | 0 | 0 | 0 | 1 | 1 | 0 | 1 | 0 | 0 | 0 | 0 | 0 |   |
| Unperturbed  | 0                 | 0         | 0          | 0   | 0    | 0     | 0     | 1     | 0        | 0        | 0    | 0   | 1    | 1   | 0    | 1      | 0     | 0      | 0   | 1    | 1            | 0               | 0   | 0    | 0    | 0     | → OE NFkB     | 1 | 0 | 0 | 0 | 1 | 0 | 0 | 0 | 0 | 0 | 0 | 1 | 0 | 0 | 0 | 0 | 1 | 1 | 1 |   |
| Unperturbed  | 0                 | 0         | 0          | 0   | 0    | 0     | 0     | 1     | 0        | 0        | 0    | 0   | 1    | 1   | 0    | 1      | 0     | 0      | 0   | 1    | 1            | 0               | 0   | 0    | 0    | 0     | → OE NonACD   | 0 | 0 | 0 | 0 | 0 | 0 | 1 | 0 | 0 | 0 | 1 | 1 | 0 | 1 | 0 | 0 | 0 | 0 | 0 |   |
| Unperturbed  | 0                 | 0         | 0          | 0   | 0    | 0     | 0     | 1     | 0        | 0        | 0    | 0   | 1    | 1   | 0    | 1      | 0     | 0      | 0   | 1    | 1            | 0               | 0   | 0    | 0    | 0     | → OE RIP1     | 0 | 0 | 0 | 0 | 0 | 0 | 1 | 0 | 0 | 0 | 1 | 1 | 0 | 1 | 1 | 0 | 0 | 0 | 0 | 0 |
| Unperturbed  | 0                 | 0         | 0          | 0   | 0    | 0     | 0     | 1     | 0        | 0        | 0    | 0   | 1    | 1   | 0    | 1      | 0     | 0      | 0   | 1    | 1            | 0               | 0   | 0    | 0    | 0     | → OE RIP1K    | 0 | 0 | 0 | 0 | 0 | 0 | 1 | 0 | 0 | 0 | 1 | 1 | 0 |   |   |   |   |   |   |   |

| Perturbation | Initial attractor |           |            |     |      |       |       |       |          |          |      |     |      |     |      |        |      |       |        |     | Perturbation | Final attractor |          |     |      |      |       |      |     |           |            |     |      |       |       |       |          |          |      |     |      |     |      |        |      |       |        |     |      |          |     |      |      |       |      |   |   |   |   |
|--------------|-------------------|-----------|------------|-----|------|-------|-------|-------|----------|----------|------|-----|------|-----|------|--------|------|-------|--------|-----|--------------|-----------------|----------|-----|------|------|-------|------|-----|-----------|------------|-----|------|-------|-------|-------|----------|----------|------|-----|------|-----|------|--------|------|-------|--------|-----|------|----------|-----|------|------|-------|------|---|---|---|---|
|              | ATP               | Apoptosis | Apoptosome | BAX | BCL2 | CASP3 | CASP8 | Cyt_c | DISC-FAS | DISC-TNF | FASL | IKK | MOMP | MPT | NFkB | NonACD | RIP1 | RIP1K | RIP1ub | ROS |              | SMAC            | Survival | TNF | TNFR | XIAP | cFLIP | cIAP | ATP | Apoptosis | Apoptosome | BAX | BCL2 | CASP3 | CASP8 | Cyt_c | DISC-FAS | DISC-TNF | FASL | IKK | MOMP | MPT | NFkB | NonACD | RIP1 | RIP1K | RIP1ub | ROS | SMAC | Survival | TNF | TNFR | XIAP | cFLIP | cIAP |   |   |   |   |
| Unperturbed  | 0                 | 0         | 0          | 0   | 0    | 0     | 0     | 1     | 0        | 0        | 0    | 0   | 1    | 1   | 0    | 1      | 0    | 0     | 0      | 0   | 1            | 1               | 0        | 0   | 0    | 0    | 0     | →    | KO  | Survival  | 0          | 0   | 0    | 0     | 0     | 0     | 1        | 0        | 0    | 0   | 0    | 1   | 1    | 0      | 1    | 0     | 0      | 0   | 1    | 1        | 0   | 0    | 0    | 0     | 0    | 0 | 0 |   |   |
| Unperturbed  | 0                 | 0         | 0          | 0   | 0    | 0     | 0     | 1     | 0        | 0        | 0    | 0   | 1    | 1   | 0    | 1      | 0    | 0     | 0      | 1   | 1            | 0               | 0        | 0   | 0    | 0    | 0     | →    | KO  | TNF       | 0          | 0   | 0    | 0     | 0     | 1     | 0        | 0        | 0    | 0   | 1    | 1   | 0    | 1      | 0    | 0     | 0      | 1   | 1    | 0        | 0   | 0    | 0    | 0     | 0    | 0 | 0 |   |   |
| Unperturbed  | 0                 | 0         | 0          | 0   | 0    | 0     | 0     | 1     | 0        | 0        | 0    | 0   | 1    | 1   | 0    | 1      | 0    | 0     | 0      | 1   | 1            | 0               | 0        | 0   | 0    | 0    | 0     | →    | KO  | TNFR      | 0          | 0   | 0    | 0     | 0     | 1     | 0        | 0        | 0    | 0   | 1    | 1   | 0    | 1      | 0    | 0     | 0      | 1   | 1    | 0        | 0   | 0    | 0    | 0     | 0    | 0 | 0 |   |   |
| Unperturbed  | 0                 | 0         | 0          | 0   | 0    | 0     | 0     | 1     | 0        | 0        | 0    | 0   | 1    | 1   | 0    | 1      | 0    | 0     | 0      | 1   | 1            | 0               | 0        | 0   | 0    | 0    | 0     | →    | KO  | XIAP      | 0          | 0   | 0    | 0     | 0     | 1     | 0        | 0        | 0    | 0   | 1    | 1   | 0    | 1      | 0    | 0     | 0      | 1   | 1    | 0        | 0   | 0    | 0    | 0     | 0    | 0 | 0 | 0 |   |
| Unperturbed  | 0                 | 0         | 0          | 0   | 0    | 0     | 0     | 1     | 0        | 0        | 0    | 0   | 1    | 1   | 0    | 1      | 0    | 0     | 0      | 1   | 1            | 0               | 0        | 0   | 0    | 0    | 0     | →    | KO  | cFLIP     | 0          | 0   | 0    | 0     | 0     | 1     | 0        | 0        | 0    | 0   | 1    | 1   | 0    | 1      | 0    | 0     | 0      | 1   | 1    | 0        | 0   | 0    | 0    | 0     | 0    | 0 | 0 | 0 |   |
| Unperturbed  | 0                 | 0         | 0          | 0   | 0    | 0     | 0     | 1     | 0        | 0        | 0    | 0   | 1    | 1   | 0    | 1      | 0    | 0     | 0      | 1   | 1            | 0               | 0        | 0   | 0    | 0    | 0     | →    | KO  | cIAP      | 0          | 0   | 0    | 0     | 0     | 1     | 0        | 0        | 0    | 0   | 1    | 1   | 0    | 1      | 0    | 0     | 0      | 1   | 1    | 0        | 0   | 0    | 0    | 0     | 0    | 0 | 0 | 0 | 0 |
